# Supplementary material for: Evolution of antibody immunity to SARS-CoV-2
Source: Springer Nature journal article supplement (doi:10.1038/s41586-021-03207-w), 2021-01-18
Supplement: MOESM2 [file 41586_2021_3207_MOESM2_ESM.xlsx]

## Sheet: Sheet1
	Table 1. Cohort characteristics
					Age (years)		Temporal dynamics (days)						Acute disease severity by WHO (0-8) ¶				ELISA binding												Neutralization (NT50)
							Sx onset to initial visit (T1)		Sx onset to follow-up visit (T2)		Time between visits				Post-acute Sx persistence †		RBD (AUC)									N (AUC)
	Sex		n														IgG (T1)	IgG (T2)		IgM (T1)	IgM (T2)		IgA (T1)	IgA (T2)		IgG (T1)	IgG (T2)		(T1)	(T2)
	Male		52		44.5		39		190		148		2		25/52		11632	6697		2811	1502		1411	1218		18169.9	14716		648.5	77.5
					(24-76)		(21-63)		(165-211)		(119-178)		(0-6)		(48.1 %)											18169.9	14716
	Female		35		45		36		192		154		2		13/35		8884	6834		2358	1459		1235	1083		17671.5	14678.1		297	87
					(26-73)		(17-67)		(168-223)		(122-179		(0-5)		(37.1 %)											17671.5	14678.1
	Sx = Symptoms
	¶ = WHO Ordinal Scale for Clinical Improvement, COVID-19 Trial Design Synopsis
	† = Persistent fatigue, dyspnea, athletic deficit, or ≥ 3 other solicited symptoms beyond 6 weeks from Sx onset
	Reported data are median (range) unless stated otherwise
