# Supplementary material for: Evolution of antibody immunity to SARS-CoV-2
Source: Springer Nature journal article supplement (doi:10.1038/s41586-021-03207-w), 2021-01-18
Supplement: MOESM5 [file 41586_2021_3207_MOESM5_ESM.xlsx]

## Sheet: Sheet1
SI Table X Sequences of cloned recombinant antibodies
													EC50 [ng/ml]										Neutralization
Patient ID	Antibody ID	Timepoint	IGH V gene	IGH J gene	IGH VDJ (nt)	IGH VDJ (aa)		IGL V gene	IGL J gene	IGL VJ (nt)	IGL VJ (aa)		RBD	R346S	E484K	Q493R	N439K	N440K	A475V	S477N	V483A	V367F	IC50 [ng/ml]	IC90 [ng/ml]
													RBD	R346S	E484K	Q493R	N439K	N440K	A457V	S477N	V483A	V367F
COV47	C050	6.2m	VH3-53	JH4	GAGGTGCAGCTGGTGGAGTCTGGAGGAGGCTTGTTCCAGCCTGGGGGGTCCCTGAGACTCTCCTGTGCAGCCTCTGGGTTCAGCGTCAGAAACAACTACGTGAGCTGGGTCCGCCAGGCTCCAGGGAAGGGGCTGGAGTGGGTCTCAGTTATTTATAGTGGTGGTACCACATACTACGCAGACTCCGTGAAGGGCCGATTCACCATCTCCAGAGACATTTCCGAGAACACACTGTATCTTCAAATGAACAGCCTGAGAGCCGAGGACACGGCCGTCTATTACTGTGCGAGAGAAGGGGACGTAGAGGGGCTTCACGACTTTTGGAGTGGTTACTCTAGAGACCGTTACTACTTTGACTACTGGGGCCAGGGAACCCTGGTCACCGTCTCCTCAG	EVQLVESGGGLFQPGGSLRLSCAASGFSVRNNYVSWVRQAPGKGLEWVSVIYSGGTTYYADSVKGRFTISRDISENTLYLQMNSLRAEDTAVYYCAREGDVEGLHDFWSGYSRDRYYFDYWGQGTLVTVSS		VL2-14	JL1	CAGTCTGCCCTGACTCAGCCTGCCTCCGTGTCTGGGTCTCCTGGACAGTCGATCATCATCTCCTGCACTGGAACCAGCGGTGACATTGGTGGTTATAACTATGTCTCCTGGTATCAACAACACCCAGGCAAAGCCCCCAAACTCATGATTTATGATGTCAGTTTTCGGCCCTCAGGGGTTTCTAATCGTTTCTCTGGCTCCAAGTCTGACAACACGGCCTCCCTGACCATCTCTGGGCTCCAGGCTGAGGACGAGGCTGATTATTACTGCAGCTCATTTACAGGCAACAATACTCGAGTCTTCGGAACTGGGACCAAGGTCACCGTCCTAG	QSALTQPASVSGSPGQSIIISCTGTSGDIGGYNYVSWYQQHPGKAPKLMIYDVSFRPSGVSNRFSGSKSDNTASLTISGLQAEDEADYYCSSFTGNNTRVFGTGTKVTVL		1.929	1.668	>10000	1.449	1.471	1.793	1.676	1.513	1.877	1.781	12.9179	28.4052
	C051	6.2m	VH3-53	JH4	GAGGTGCAGCTGGTGGAGTCTGGAGGAGGCTTGATCCAGGCTGGGGGGTCCCTGAGACTCTCTTGTGCAGCCTCTGGGTTCGGCGTCAGAAACAACTACATGAGTTGGGTCCGCCAGGCTCCAGGGAAGGGGCTGGAGTGGGTCTCAGTTATTTATAGCGGTGGTACGACATACTACGCAGACTCCGTGAAGGGCCGATTCACCATCTCCAGAGACAACTCCAAGAACACGGTGTTTCTTCAAATGAACAGCCTGAGAGCCGAGGACACGGCCGTGTATTACTGTGCGAGAGAAGGAGACGTAGAAGGGTTTTCCGATTTGTGGAGTGGTTATTCTAGAGACCGTTACTACTTTGACTACTGGGGCCAGGGAACCCTGGTCACCGTCTCCTCAG	EVQLVESGGGLIQAGGSLRLSCAASGFGVRNNYMSWVRQAPGKGLEWVSVIYSGGTTYYADSVKGRFTISRDNSKNTVFLQMNSLRAEDTAVYYCAREGDVEGFSDLWSGYSRDRYYFDYWGQGTLVTVSS		VL2-14	JL1	CAGTCTGCCCTGACTCAGCCTGCCTCCGTGTCTGGGTCTCCTGGACAGTCGATCACCTTCTCCTGCACCGGAACCAGCAGTGACGTTGGTGGTTACAACTATGTCTCCTGGTATCAACAATACCCAGGCAAAGCCCCCAAACTGTTGATTTATGATGTCACTAATCGGCCCTCAGGGGTTTCTGATCGCTTCTCTGGCTCCAAGTCTGGCAACACGGCCTCCCTGACCATCTCTGGGCTCCAGGCTGAGGACGAGGCTGATTATTACTGCAGCTCGTTCACAAGCAGCAACACTCGAGTCTTCGGAACTGGGACCAAGGTCACCGTCCTA	QSALTQPASVSGSPGQSITFSCTGTSSDVGGYNYVSWYQQYPGKAPKLLIYDVTNRPSGVSDRFSGSKSGNTASLTISGLQAEDEADYYCSSFTSSNTRVFGTGTKVTVL		1.647	2.299	200.4	1.458	1.628	2.094	1.572	1.697	1.981	2.009	12.5108	91.6896
	C052	6.2m	VH3-53	JH4	GAGGTGCAGCTGGTGGAGTCCGGAGGAGGCTTGATCCGGCCTGGGGGGTCCCTGAGACTCTCCTGTGCAGCCTCCGGATTCAGCGTCAGTAACAACTACATGAGCTGGGTCCGCCAGGCTCCAGGGAAGGGGCTGGAGTGGGTCTCAGTTATTTATAGCGGTGGTACCACATACTACGCAGACTCCGTGAAGGGCCGATTCAACATCTCCAGAGACAACTCCAAGAATACGGTGTATCTTCAAATGAACAGCCTGAGAGCCGAGGACACGGCCGTATATTATTGTGCGAGAGAAGGGGACGTAGAAGGCTATTACGATTTTTGGAGTGGTTATTCTAGAGACCGTTACTATTTTGACTACTGGGGCCAGGGAGCCCTGGTCACCGTCTCCTCAG	EVQLVESGGGLIRPGGSLRLSCAASGFSVSNNYMSWVRQAPGKGLEWVSVIYSGGTTYYADSVKGRFNISRDNSKNTVYLQMNSLRAEDTAVYYCAREGDVEGYYDFWSGYSRDRYYFDYWGQGALVTVSS		VL2-14	JL1	CAGTCTGCCCTGACTCAGCCTGCCTCCGTGTCTGGGTCTCCTGGACAGTCGATCACCATCTCCTGCACTGGAACCAGCAGTGACGTTGGTGGTTATAACTATGTCTCCTGGTACCAACAACACCCAGGCAAAGCCCCCAAACTCATGATTTATGATGTCAGTAATCGGCCCTCAGGGGTTTCTAATCGCTTCTCTGGCTCCAAGTCTGGCAACACGGCCTCCCTGACCATCTCTGGGCTCCAGGCTGAGGACGAGGCTGATTATTACTGCAACTCATATACAAGCAACAACACTCGAGTCTTCGGAACTGGGACCAAGGTCACCGTCCTAG	QSALTQPASVSGSPGQSITISCTGTSSDVGGYNYVSWYQQHPGKAPKLMIYDVSNRPSGVSNRFSGSKSGNTASLTISGLQAEDEADYYCNSYTSNNTRVFGTGTKVTVL		1.234	1.3035	>10000	12.15	1.52	1.654	1.41	1.523	1.421	1.528	4.88849	27.7907
	C053	6.2m	VH3-53	JH4	GAGGTGCAGCTGGTGGAGTCTGGAGGAGGCTTGATCCAGCCTGGGGGGTCCCTGAGACTCTCCTGTGCAGCCTCTGGGTTCATCGTCAGTAACAACTACATGAGCTGGGTCCGCCAGGCTCCAGGGAAGGGGCTGGATTGGGTCTCAGTTATTTATAGTGGTGGTACTACATACTACGCAGACTCCGTGAAGGGCCGATTCACCATCTCCAGAGACAATTCCAAGAACACGCTGTATCTTCAAATGAACAGCCTGAGAGCCGAGGACACGGCCGTTTATTACTGTGCGAGAGAAGGAGATGTAGAAGGATATCACGATTCTTGGAGTGGTTATTCAAGAGACCGCTACTACTTTGACTACTGGGGCCAGGGAACCCTGGTCACCGTCTCCTCAG	EVQLVESGGGLIQPGGSLRLSCAASGFIVSNNYMSWVRQAPGKGLDWVSVIYSGGTTYYADSVKGRFTISRDNSKNTLYLQMNSLRAEDTAVYYCAREGDVEGYHDSWSGYSRDRYYFDYWGQGTLVTVSS		VL2-14	JL1	CAGTCTGCCCTGACTCAGCCTGCCTCCGTGTCTGGGTCTCCTGGACAGTCGATCACCATCTCCTGCACTGGAAGCAGCAGTGACGTTGGTGGTTATAATTTTGTCTCCTGGTACCAACAACACCCAGGCAGAGCCCCCAAACTCATGATTTATGATGTCAGCAATCGGCCCTCAGGGGTTTCTAATCGCTTCTCTGGCTCCAAGTCTGGCAACACGGCCTCCCTGACCATCTCTGGGCTCCAGGTTGAGGACGAGGCTGATTATTACTGCAGCTCATATACAAACAACAACACTCGAGTCTTCGGAACTGGGACCAAGGTCACCGTCCTAG	QSALTQPASVSGSPGQSITISCTGSSSDVGGYNFVSWYQQHPGRAPKLMIYDVSNRPSGVSNRFSGSKSGNTASLTISGLQVEDEADYYCSSYTNNNTRVFGTGTKVTVL		1.5255	1.568	>10000	2.118	1.653	1.821	1.612	1.562	1.831	1.625	8.23191	39.8012
	C054	6.2m	VH3-53	JH4	GAGGTGCAGCTGGTGGAGTCTGGAGGAGGCTTGATCCAGCCTGGGGGGTCCCTGAGACTCTCCTGTGCAGCCTCTGGGTTCACCGTCAGTAACAACTACATGAGCTGGGTCCGCCAGGCTCCAGGGAAGGGGCTGGAGTGGGTCTCAGTTATTTATAGCGGTGGTAGCACATACGACGCAGACTCCGTGAAGGGCCGATTCACCATCTCCAGAGACAATTCCAAGAACACGCTGTATCTTCAAATGAACAGCCTGAGCGCCGAGGACACGGCCGTGTATTACTGTGCGAGAGAAGGGGACGTAGAAGGGTATTACGATTTTTGGAGTGGTTATTCTAGAGACCGTTACTACTTTGACTACTGGGGCCAGGGAACCCTGGTCACCGTCTCCTCAG	EVQLVESGGGLIQPGGSLRLSCAASGFTVSNNYMSWVRQAPGKGLEWVSVIYSGGSTYDADSVKGRFTISRDNSKNTLYLQMNSLSAEDTAVYYCAREGDVEGYYDFWSGYSRDRYYFDYWGQGTLVTVSS		VL2-14	JL1	CAGTCTGCCCTGACTCAGCCTGCCTCCGTGTCTGGGTCTCCTGGACAGTCGATCACCATCTCCTGCACTGGAACCAGCAGTGACGTTGGTGGTTATAACTATGTCTCCTGGTACCAACAACACCCAGGCAAAGCCCCCAAACTCATGATTTATGATGTCAGTAATCGGCCCTCAGGGGTTTCTAATCGCTTCTCTGGCTCCAAGTCTGGCAACACGGCCTCCCTGACCATCTCTGGGCTCCAGGCTGAGGACGAGGCTGATTATTACTGCAGCTCATATACAAGCAGCAGCGCTCGAGTCTTCGGAACTGGGACCAAGGTCACCGTCCTAG	QSALTQPASVSGSPGQSITISCTGTSSDVGGYNYVSWYQQHPGKAPKLMIYDVSNRPSGVSNRFSGSKSGNTASLTISGLQAEDEADYYCSSYTSSSARVFGTGTKVTVL		1.5785	1.589	>10000	>10000	1.916	1.857	1.82	1.597	1.73	1.54	4.83531	15.4488
	C055	6.2m	VH3-66	JH3	GAGGTGCAGCTGGTGGAGTCTGGGGGAGGCTTGGTCCAGCCGGGGGGGTCCTTGAGACTCTCCTGTGCAGCCTCTGGATTCAGTGTCAGCACCAAGTACATGACATGGGTCCGTCAGGCTCCAGGGAAGGGGCTGGAGTGGGTCTCAGTTCTCTACAGCGGTCGGACTGACTACTACGCAGACTCCGTGAAGGGCAGATTCACCATCTCCAGAGACAGTTCCAAGAACATTTTATATCTTCAGATGAGCAGCTTAAGAGTCGAGGACACAGGTTTTTATTACTGTGCCAGAGACTCGTCGGAAGTCCGTGACCACCCCGGGCACCCAGGGCGCTCGGTGGGGGCTTTTGATATCTGGAGCCAAGGGACAATGGTCACCGTCTCTTCAG	EVQLVESGGGLVQPGGSLRLSCAASGFSVSTKYMTWVRQAPGKGLEWVSVLYSGRTDYYADSVKGRFTISRDSSKNILYLQMSSLRVEDTGFYYCARDSSEVRDHPGHPGRSVGAFDIWSQGTMVTVSS		VL2-23	JL3	CAGTCTGCCCTGACTCAGCCTGCCTCCGTGTCTGGGTCTCCTGGACAGTCGATCGCCATCTCCTGCACTGGAACCAGCAATGATGTTGGGAGTTATACCCTTGTCTCCTGGTACCAACAATACCCAGGCAAAGCCCCCAAACTCTTGATTTTTGAAGACTCTCAGCGGTCCTCAGGGATTTCTAATCGCTTCTCTGGTTCCAAGTCTGGCAACACGGCCTCCCTAACAATCTCTGGACTCCGGGGTGAAGACGAGGCTGATTATTATTGTTGCTCATATGCAGGTAGTCATACTTTTGTGTTCGGCGGAGGGACCAAAGTGACCGTCCTAG	QSALTQPASVSGSPGQSIAISCTGTSNDVGSYTLVSWYQQYPGKAPKLLIFEDSQRSSGISNRFSGSKSGNTASLTISGLRGEDEADYYCCSYAGSHTFVFGGGTKVTVL		1.2492	1.299	3.151	1.272	1.474	1.351	1.226	1.161	1.54	1.28	6.39615	36.8251
	C057	6.2m	VH1-2	JH3	CAGGTGCAGCTGGTGCAGTCTGGGGCTGAGGTGAAGAGGCCTGGGGCCTCAGTGAAGCTCTCCTGTAAGGCTTCTGGATACATCTTCACCGACTACTCTATACACTGGGTGCGACAGGCCCCTGGACAAGGGCTTGAGTGGATGGGATGGGTCAACCCTAACAGTGGCGGCGGAAACTCTGCACAGAAGTTTATGGACTGGGTCACCATGGCCAGGGACACATCCATCACCACAGTTTACATGGAACTGAGCAGGCTGAGATCTGACGACACGGCCGTGTATTACTGTGCGAGAGGCCCCTTATTTCACAAATTAGTCTACGATTCTTGGAGTGGCTATCATGATGGTTTTGACATATGGGGCCAAGGGACAATGGTCACCGTCTCTTCAG	QVQLVQSGAEVKRPGASVKLSCKASGYIFTDYSIHWVRQAPGQGLEWMGWVNPNSGGGNSAQKFMDWVTMARDTSITTVYMELSRLRSDDTAVYYCARGPLFHKLVYDSWSGYHDGFDIWGQGTMVTVSS		VL2-14	JL3	CAGTCTGCCCTGACTCAGCCTGCCTCCGTGTCTGGGTCTCCTGGACAGTCGATCACCATCTCCTGCACTGGAACCAGCAGTGACGTTGGTGCTTATAAGTTTGTCTCCTGGTACCAACAACACCCAGGCAAAGCCCCCCAACTCATCATTTATGAGGTCAGTAATCGGCCCTCAGGGGTTTCTAATCGCTTCTCTGGCTCCAAGTCTGGCAACACGGCCTCCCTGACCATCTCTGGGCTCCAGGCTGAGGACGAGGCTGATTATTATTGCAGCTCATATACAAACGCCAGCACCTGGGTGTTCGGCGGCGGGACCGAGCTGACCGTCCTAG	QSALTQPASVSGSPGQSITISCTGTSSDVGAYKFVSWYQQHPGKAPQLIIYEVSNRPSGVSNRFSGSKSGNTASLTISGLQAEDEADYYCSSYTNASTWVFGGGTELTVL		2.31	2.4325	>10000	9.78	1.718	1.827	1.831	1.4	1.998	1.956	2.77579	33.5925
	C058	1.3m	VH1-2	JH3	CAGGTGCAGCTGGTGCAGTCTGGGGCTGAGGTGAAGAAGCCTGGGGCCTCAGTGAAGGTCTCCTGCAAGGCTTCTGGATACATCTTCACCGACTACTCTATGCACTGGGTGCGACAGGCCCCTGGACAAGGGCTTGAGTGGATAGGATGGGTCAACCCTAACAGTGGTGGCACAAACTATGCACAGAAGTTTCAGGGCTGGGTCACCATGGCCAGGGACACATCCATCACCACAGTTTACATGGAGCTGAGCAGGCTGAAATCTGACGACACGGCCGTGTATTTCTGTGCGAGAGGCCCCTTATTTCACAGATTAGTCTACGATTTTTGGAGTGGTTATCATGATGGTTTTGATATGTGGGGCCAAGGGACAATGGTCACCGTCTCTTCAG	QVQLVQSGAEVKKPGASVKVSCKASGYIFTDYSMHWVRQAPGQGLEWIGWVNPNSGGTNYAQKFQGWVTMARDTSITTVYMELSRLKSDDTAVYFCARGPLFHRLVYDFWSGYHDGFDMWGQGTMVTVSS		VL2-14	JL3	CAGTCTGCCCTGACTCAGCCTGCCTCCGTGTCTGGGTCTCCTGGACAGTCGATCACCATCTCCTGCACTGGAACCAGCAGTGACGTTGGTGGTTATAAGTTTGTCTCCTGGTACCAACAGCACCCAGGCAAAGCCCCCAAACTCATGATTTATGAGGTCAGTAATCGGCCCTCAGGGGTTTCTAATCGCTTCTCTGGCTCCAAGTCTGGCAACACGGCCTCCCTGACCATCTCTGGGCTCCAGGCTGAGGACGAGGCTGATTATTACTGCAACTCATATACAAGCAGCAGCACTTGGGTGTTCGGCGGAGGGACCAAGCTGACCGTCCTAG	QSALTQPASVSGSPGQSITISCTGTSSDVGGYKFVSWYQQHPGKAPKLMIYEVSNRPSGVSNRFSGSKSGNTASLTISGLQAEDEADYYCNSYTSSSTWVFGGGTKLTVL		2.284	2.62	>10000	601.3	2.356	2.707	2.274	1.934	2.853	2.314	5.27913	31.5489
	C059	6.2m	VH1-2	JH3	CAGGTGCAGCTGGTGCAGTCTGGGGCTGAGGTGAAGAAGCCTGGGGCCTCAATCAAGGTCTCCTGCAAGGCCTCTGGATACACCTTCACCGACTACTCAATGCACTGGGTGCGACAGGCCCCTGGACAAGGGCTTGAGTGGATGGGATGGATCAACCCTAACAGTGGTGGCACAAAGTATGCACAGAAGTTTCAGGGCTGGGTCACCATGACCAGGGACATGTCCATCACTACAGTCTACATGGAGTTGACCAGGCTGAGATCTGACGCCACGGCCGTGTTTTACTGTGCGAGAGGCCCCTTATTTCACAAATTAGTCTACGATTCTTGGACTGGTTATCATGATGGTTTTGATATCTGGGGCCAAGGGACAATGGTCACCGTCTCTTCAG	QVQLVQSGAEVKKPGASIKVSCKASGYTFTDYSMHWVRQAPGQGLEWMGWINPNSGGTKYAQKFQGWVTMTRDMSITTVYMELTRLRSDATAVFYCARGPLFHKLVYDSWTGYHDGFDIWGQGTMVTVSS		VL2-14	JL3	CAGTCTGCCCTGACTCAGCCTGCCTCCGTGTCTGGGTCTCCTGGACAGTCGATCACCATCTCCTGCACTGGAACCAGCAGTGACGTTGGTGGTTATAACTATGTCTCCTGGTACCAACATTACCCAGGCAAAGCCCCCAAACTCATGATTTATGAGGTCACTCATCGGCCCTCAGGGGTTTCTAATCGCTTCTCTGGCTCCAAGTCTGGCAACACGGCCTCCCTGACCATCTCTGGGCTCCAGGCTGAGGACGAGGCTGATTATTACTGCAGCTCATCTACAAACAGCAGCACTTGGGTGTTCGGCGGAGGGACCAAGATGACCGTCCTA	QSALTQPASVSGSPGQSITISCTGTSSDVGGYNYVSWYQHYPGKAPKLMIYEVTHRPSGVSNRFSGSKSGNTASLTISGLQAEDEADYYCSSSTNSSTWVFGGGTKMTVL		1.88	2.2665	>10000	4.371	5.691	1.634	1.693	1.515	2.043	1.931	8.34901	24.4935
	C060	6.2m	VH3-66	JH6	GAGGTGCAGCTGGTGGAGTCTGGGGGAGGCTTGGTCCAGCCTGGGGGGTCCCAGAGACTCTCCTGTGCAGCCTCTGGATTCACCGTCAGTAGCAATTACATGAGCTGGATCCGCCAGGCTCCAGGGAAGGGGCTGGAGTGGGTCTCAGTTATTTATAGCGGTGGTAGCGCATACTACGTAGACTCCGTGAAGGGCAGATTCACCATCTCCAGAGACAATTCCAAGAACACCCTGTATCTTCAAATGAACAGCCTGAGACCCGAGGACACGGCTGTGTATTACTGTGCGAGAATCGCAAACTACATGGACGTCTGGGGCAAAGGGACCACGGTCACCGTCTCCTCAG	EVQLVESGGGLVQPGGSQRLSCAASGFTVSSNYMSWIRQAPGKGLEWVSVIYSGGSAYYVDSVKGRFTISRDNSKNTLYLQMNSLRPEDTAVYYCARIANYMDVWGKGTTVTVSS		VK3-15	JK4	GAAATAGTGATGACGCAGTCTCCAGCCACCCTGTCTGTGTCTCCAGGGGAAAGAGCCACCCTCTCCTGCAGGGCCAGTCAGAGTGTTAGCAGCCACTTAGCCTGGTACCAGCAGAAACCTGGCCAGGCTCCCAGGCTCCTCATCTATGGTGCATCCACCAGGGCCACTGGTATCCCAACCAGGTTCAGTGGCAGTGGGTCTGGGACAGAGTTCACTCTCACCATCAGCAGCCTGCAGTCTGAAGATTTTGCAGTTTATTACTGCCAGCAGTATAATAACTGGCCTCCGCTCACTTTCGGCGGAGGGACCAAGGTGGAGATCAAAC	EIVMTQSPATLSVSPGERATLSCRASQSVSSHLAWYQQKPGQAPRLLIYGASTRATGIPTRFSGSGSGTEFTLTISSLQSEDFAVYYCQQYNNWPPLTFGGGTKVEIK		43.54	22.02	4040	4328	111.7	773.5	>10000	38.21	1413	7849	>10000	>10000
	C062	6.2m	VH3-21	JH4	GAGGTGCAGCTGGTGGAGTCTGGGGGAGGCCTGGTCAAGCCTGGGGGGTCCCTGAGACTCACCTGTGCAGCCTCTGGATTCACCTTCAGTACCTATAGCATGAACTGGGTCCGCCAGGCTCCAGGGAAGGGGCTGGAGTGGGTCTCATCCATTAGTAGTAGTAGTAGTTACATATACTACGCAGACTCAGTGAAGGGCCGATTCACCATCTCCAGAGACAACGCCAAGAACTCACTGTATCTGCAAATGAACAGCCTGAGAGCCGAGGACACGGCTGTGTATTACTGTGCGAGAGAGAGGGGGTATTACGGTGGTAAAACCCCCCCATTTCTTGGGGGCCAGGGAACCCTGGTCACCGTCTCCTCAG	EVQLVESGGGLVKPGGSLRLTCAASGFTFSTYSMNWVRQAPGKGLEWVSSISSSSSYIYYADSVKGRFTISRDNAKNSLYLQMNSLRAEDTAVYYCARERGYYGGKTPPFLGGQGTLVTVSS		VL6-57	JL3	AATTTTATGCTGACTCAGCCCCACTCTGTGTCGGAGTCTCCGGGGAAGACGGTAACCATCTCCTGCACCGGCAGCAGTGGCAGCATTGCCAGCAACTATGTGCAGTGGTACCAGCAGCGCCCGGGCAGTGCCCCCACCACTGTGATCTATGAGGATAACCAAAGACCCTCTGGGGTCCCTGATCGGTTCTCTGGCTCCATCGACAGCTCCTCCAACTCTGCCTCCCTCACCATCTCTGGACTGAAGACTGAGGACGAGGCTGACTACTACTGTCAGTCTTATGATAGCAGCAATTATTGGGTGTTCGGCGGAGGGACCAAGCTGACCGTCCTAG	NFMLTQPHSVSESPGKTVTISCTGSSGSIASNYVQWYQQRPGSAPTTVIYEDNQRPSGVPDRFSGSIDSSSNSASLTISGLKTEDEADYYCQSYDSSNYWVFGGGTKLTVL		4.689	9.391	127.5	10.84	17.4	26.93	64.52	5.704	5.549	3.896	703.609	>10000
	C063	6.2m	VH5-51	JH4	GAGGTGCAGCTGGTGCAGTCTGGAGCAGAGGTGAAGAAGCCCGGGGACTCTCTGAAGATCTCCTGTAAGGCTTCTGGATACAGCTTTACCAGATATTGGATCGGCTGGGTGCGCCAGATGCCCGGGAAAGGCCTGGATTGGATGGGGATCATCTATCCTGGTGACTCTGATACCAGATACAGCTCGTCCTTCCAAGGCCAGGTCACCATCTCAGCCGACAAGTCCATCAGCACCGCCTACCTGCAGTGGAGCAGCCTGAAGGCCTCGGACACCAGTTTGTATTACTGTGTGAGACGGGCCAGCTCGACCAATTTTGAGTTCTGGGGCCAGGGAACCCTGGTCACCGTCTCCTCAG	EVQLVQSGAEVKKPGDSLKISCKASGYSFTRYWIGWVRQMPGKGLDWMGIIYPGDSDTRYSSSFQGQVTISADKSISTAYLQWSSLKASDTSLYYCVRRASSTNFEFWGQGTLVTVSS		VL3-21	JL1	TCCTATGAGCTGACTCAGCCACCCTCGGTGTCAGTGGCCCCAGGACAGACGGCCACGATTACCTGTGGGGGAAACAACATTGGAAGTAAAACTGTGCACTGGTACCAGCAGAAGCCAGGCCAGGCCCCTGTGGTGGTCGTCTATGATGATAGCGACCGGCCCTCAGGGATCCCTGAGCGATTCTCTGGCTCCAAGTCTGGGAGCACGGCCACCCTGACCATCACCAGGGTCGAAGCCGGGGATGAGGCCGACTATTACTGTCAGGTGTGGGACAGTACTAGTGATCATTATGTCTTCGGAACTGGGACCAAGGTCGCCGTCATAG	SYELTQPPSVSVAPGQTATITCGGNNIGSKTVHWYQQKPGQAPVVVVYDDSDRPSGIPERFSGSKSGSTATLTITRVEAGDEADYYCQVWDSTSDHYVFGTGTKVAVI		414	n.d.	n.d.	n.d.	n.d.	n.d.	n.d.	n.d.	n.d.	n.d.	>10000	>10000
	C064	6.2m	VH3-23	JH4	GAGGTGCAGCTGTTGGAGTCTGGGGGAGACTTGGTACAGCCTGGGGGGTCCCTGAGACTCTCCTGTGCAGCCTCTGGATTCACCTTTAGCAACTATGCCATGAGCTGGGTCCGCCAGGCTCCAGGGAAGGGGCTGGAGTGGGTCTCAGCTATTAGTGGTAGTGGTGGTAACACATACTACGCAGACTCCGTGAAGGGCCGGTTCACCATCTCCAGAGACAATTCCAAGAACACGCTGTATCTGCAAATGAACAGCCTGAGAGCCGAGGACACGGCCGTATATTACTGTGCGAAAGCCGTCCACTACGGTGGTAACTCCGATCGGAGATTTTCGGAACCCTCCGCGCCATTTGACTACTGGGGCCAGGGAACCCTGGTCACCGTCTCCTCAG	EVQLLESGGDLVQPGGSLRLSCAASGFTFSNYAMSWVRQAPGKGLEWVSAISGSGGNTYYADSVKGRFTISRDNSKNTLYLQMNSLRAEDTAVYYCAKAVHYGGNSDRRFSEPSAPFDYWGQGTLVTVSS		VL2-23	JL1	CAGTCTGCCCTGACTCAGCCTGCCTCCGTGTCTGGGTCTCCTGGACAGTCGATCACCATCTCCTGCACTGGAACCAGCAGTGATGTTGGGAGTTATAACCTTGTCTCCTGGTACCAACAGCACCCGGGCAAAGCCCCCAAACTCATGATTTATGAGGGCAGTAAGCGGCCCTCAGGGGTTTCTAATCGCTTCTCTGGCTCCAAGTCTGGCAACACGGCCTCCCTGACAATCTCTGGGCTCCAGGCTGAGGACGAGGCTGATTATTACTGCTGCTCATATGCAGGTAGTAGCACGCCTTATGTCTTCGGAACTGGGACCAAGGTCACCGTCCTAG	QSALTQPASVSGSPGQSITISCTGTSSDVGSYNLVSWYQQHPGKAPKLMIYEGSKRPSGVSNRFSGSKSGNTASLTISGLQAEDEADYYCCSYAGSSTPYVFGTGTKVTVL		362.7	n.d.	n.d.	n.d.	n.d.	n.d.	n.d.	n.d.	n.d.	n.d.	3053.48	>10000
	C065	6.2m	VH4-31	JH3	CAGGTGCAGCTGCAGGAGTCGGGCCCAGGACTGGTGAAGCCTTCACAGACCCTGTCCCTCACCTGCACTGTCTCTGGTGGCTCCATCAGCAGTAGTAATTACTACTGGAGCTGGATCCGCCAGCACCCAGGGAAGGGCCTGGAGTGGATTGGGTACATCGATTACAGTGGGGGCACCTACTACAACCCGTCCCTCAAGAGTCGAGTTACCATATCAGTAGACACGTCTAAGAACCAGTTCTCCCTGAAGCTGAGCTCTGTGACTGCCGCGGACACGGCCGTTTATTACTGTGCGAGAGTGTCGACTACGGTGACTACGTATTTGGTTGGTGGTTTTGATATCTGGGGCCAAGGGACAATGGTCACCGTCTCTTCAG	QVQLQESGPGLVKPSQTLSLTCTVSGGSISSSNYYWSWIRQHPGKGLEWIGYIDYSGGTYYNPSLKSRVTISVDTSKNQFSLKLSSVTAADTAVYYCARVSTTVTTYLVGGFDIWGQGTMVTVSS		VK1-33	JK1	CATCCGGATGACCCAGTCTCCATCCTCCCTGTCTGCATCTGTAGGAGACAGAGTCACCATCACTTGCCAGGCGAGTCAGGACATTACCAACTATTTAAATTGGTATCAGCAGAAACCAGGGAAAGCCCCTAAGCTCCTGCTCTACGATGCATCCAATTTGGAAACAGGGGTCCCATCAAGGTTCAGTGGAAGTGGATCTGGGACAGATTTTACTTTCACCATCAGCAGCCTGCAGCCTGAAGATATTGCAACATATTACTGTCAACAGTATGATAATCTCCCGTGGACGTTCGGCCAAGGGACCAAGGTGGAAATCAAAC	IRMTQSPSSLSASVGDRVTITCQASQDITNYLNWYQQKPGKAPKLLLYDASNLETGVPSRFSGSGSGTDFTFTISSLQPEDIATYYCQQYDNLPWTFGQGTKVEIK		29.13	n.d.	n.d.	n.d.	n.d.	n.d.	n.d.	n.d.	n.d.	n.d.	2746.14	>10000
	C066	6.2m	VH3-53	JH6	GAGGTGCAGCTGGTGGAGTCTGGAGGAGGCTTGATCCAGCCTGGGGGGTCCCTGAGACTCTCCTGTGCAGCCTCTGGGCTCCTCGTCAGTAGAAACTACATGACCTGGGTCCGCCAGGCTCCAGGGAAGGGGCTGGAGTGGGTCTCAGTTATTTACAGCGGTGGTAGCACATTCTACGCAGACTCCGTGAGGGGCCGATTCACCATCTCCAGAGACAATTCCAAGAACACGTTGTATCTTCAAATGGACAGCCTGAGAGCCGAGGACACGGCCGTGTATTACTGTGCGAGAGATGTTGGAGACTACTACGGTATGGACGTCTGGGGCCAAGGGACCACGGTCACCGTCTCCTCAG	EVQLVESGGGLIQPGGSLRLSCAASGLLVSRNYMTWVRQAPGKGLEWVSVIYSGGSTFYADSVRGRFTISRDNSKNTLYLQMDSLRAEDTAVYYCARDVGDYYGMDVWGQGTTVTVSS		VK1-9	JK4	GACATCCAGTTGACCCAGTCTCCAGCCTTCCTGTCTGCATCTGTAGGAGACAGAGTTACCATCACTTGCCGGGCCAGTCAGGGCATGAGCAATTATTTAGCCTGGTATCAGCAAAAACCAGGGAAAGCCCCTAACCTCCTGATCTATACTGCATCCACTTTGCAAAGTGGGGTCCCATCAAGGTTCAGCGGCAGTGGATCTGGGACAGAATTCACTCTCACAATCAGCAGCCTGCAGCCTGAAGATTTTGCAACTTATTACTGTCAACTTCTTAATAGTTACCCTCAGCTCACTTTCGGCGGAGGGACCAAGGTGGAGATCAAAC	DIQLTQSPAFLSASVGDRVTITCRASQGMSNYLAWYQQKPGKAPNLLIYTASTLQSGVPSRFSGSGSGTEFTLTISSLQPEDFATYYCQLLNSYPQLTFGGGTKVEIK		4.204	n.d.	n.d.	n.d.	n.d.	n.d.	n.d.	n.d.	n.d.	n.d.	22.7957	136.007
	C067	6.2m	VH3-30	JH3	AGGTGCAGCTGGTGGAGTCTGGGGGGGGCGTGGTCCAGCCTGGGAGGTCCCTGAGACTCTCCTGTGCAGCCTCTGGATTCAGCTTCAGAATCTTTGGCATGAACTGGGTCCGCCAGGCTCCAGGCAAGGGGCTGGATTGGGTGGCGGGTATCTCACATGATGGAAGTGATAAGTACTTTGCAGACTCCGTGAAGGGCCGATTCACCATCTCCAGAGACAATTCCAAGAACACTCTTTATCTGCAAATGAACAGCCTGAGAGCTGACGACACGGCTGTCTATTACTGTGCGAGAGATATGGAGGTGGATTACTATGATAGGAGTGGGCATTACCACGTCTTCCATGCTTTTGATATCTGGGGCCAAGGGACAATGGTCACCGTCTCTTCAG	VQLVESGGGVVQPGRSLRLSCAASGFSFRIFGMNWVRQAPGKGLDWVAGISHDGSDKYFADSVKGRFTISRDNSKNTLYLQMNSLRADDTAVYYCARDMEVDYYDRSGHYHVFHAFDIWGQGTMVTVSS		VK4-1	JK2	GACATCGTGATGACCCAGTCTCCAGACTCCCTGGCTGTGTCTCTGGGCGCGAGGGCCACCATCAACTGCAAGTCCAGCCAGAGTATTTTATACAGTTCCGACAATAAGAGCTCCTTAGCTTGGTACCAGCAGAAACCAGGACACCCTCCTAAACTGCTCATTTACTGGGCATCTACTCGGGAATCCGGGGTCCCTGACCGATTCAGTGGCAGCGAGTCTGGGACAGATTTCACTCTCACCATCAGCAACCTGCAGGGTGAAGATGTGGCAGTTTATTACTGTCAGCAATATTATAGTATTCCTCGTAGTTTTGGCCAGGGGACCAAGCTGGAGATCAAAC	DIVMTQSPDSLAVSLGARATINCKSSQSILYSSDNKSSLAWYQQKPGHPPKLLIYWASTRESGVPDRFSGSESGTDFTLTISNLQGEDVAVYYCQQYYSIPRSFGQGTKLEIK		6.976	n.d.	n.d.	n.d.	n.d.	n.d.	n.d.	n.d.	n.d.	n.d.	87.3262	350.232
	C068	6.2m	VH3-33	JH6	CAGGTGCAGCTGGTGGAGTCTGGGGGAGGCGTGGTCCAGCCTGGGAGGTCCCTCAGACTCTCCTGTGTAGCGTCTGGATTCAGCTTCAGTACCTATGGCATGCACTGGGTCCGCCAGGCTCCAGGCAAGGGGCTGGAGTGGGTGGCACTCATATGGTCTGATGGAAGTAATAAATACTATGGAGACGCCGCGGAGGGCCGATTTACCATCTCCAGAGACAATTCCAACAACACGCTGTACCTACAGATGAACAACCTGAGAGCCGAGGACACGGCTCTATATTATTGTGCGAGAGATCATAGCAGCAGCTCGTTCGTCTACTACTACTACATGGACGTCTGGGGCAAAGGGACCACGGTCACCGTCTCCTCAG	QVQLVESGGGVVQPGRSLRLSCVASGFSFSTYGMHWVRQAPGKGLEWVALIWSDGSNKYYGDAAEGRFTISRDNSNNTLYLQMNNLRAEDTALYYCARDHSSSSFVYYYYMDVWGKGTTVTVSS		VL2-11	JL1	CAGTCTGCCCTGACTCAGCCTCGCTCAGTGTCCGGGTCTCCTGGACAGTCAGTCACCATCTCCTGCACTGGAACCAGCAGTGATATTGGTGGTTATAATTATGTCTCCTGGTACCAACAGCACCCAGACAAAGCCCCCAAATTTATCATTTTTGATGTCAGTAAGCGGCCCTCAGGGGTCCCTGATCGCTTCTCTGGCTCCAAGTCTGGCAACACGGCCTCCCTGACCATCTCTGGTCTCCAGGCTGAGGATGAGGCTGATTATTACTGCTGCTCATATGCAGGCCCTTACCCTTATGTCTTCGGAACTGGGACCAAGGTCACCGTCCTCG	QSALTQPRSVSGSPGQSVTISCTGTSSDIGGYNYVSWYQQHPDKAPKFIIFDVSKRPSGVPDRFSGSKSGNTASLTISGLQAEDEADYYCCSYAGPYPYVFGTGTKVTVL		5.455	n.d.	n.d.	n.d.	n.d.	n.d.	n.d.	n.d.	n.d.	n.d.	54.6954	114.534
	C069	6.2m	VH1-69	JH4	CAGGTGCAGCTGGTGCAGTCTGGGGCTGAGGTGAAGAAGCCTGGGTCGTCGGTGAACGTCTCCTGCAAGGCTTCTGGAGGCACCTTCAGCACCTATGCTATCCACTGGGTGCGACAGGCCCCTGGACAAGGGCTTGAGTGGATGGGAGGGATCATCCCTCTCTTTCATACAGCAAACTACGCACAGAAGTTCCAGGGCAGAGTCACGATTACCGCGGACGAATCCACGAGCACAGCCTACATGGAGCTGAGCAGCCTGAGATCTGAGGACACGGCCATGTATTACTGTGCGATCAACACTCAGTGGGACCTAGTCCCAAGGTGGGGCCGGGGAACCCTGGTCACCGTCTCCTCAG	QVQLVQSGAEVKKPGSSVNVSCKASGGTFSTYAIHWVRQAPGQGLEWMGGIIPLFHTANYAQKFQGRVTITADESTSTAYMELSSLRSEDTAMYYCAINTQWDLVPRWGRGTLVTVSS		VK3-20	JK2	GAAATTGTGTTGACGCAGTCTCCAGGCACCCTGTCTTTGGCTCCAGGGGAAAGAGCCACCCTCTCCTGCAGGGCCAGTCAGAGTGTTAACAGTAACTACTTAGCCTGGTATCAGCAAAAACCTGGCCAGGCTCCCAGGCTCCTCATCTATGGTGCTTCCAGCAGGGCCACTGGCATCCCAGACAGGTTCAGTGGCAGTGGGTCTGGGACAGACTTCACTCTCACCATCAGCAGACTGGAGCCTGAAGATTTTGCAGTGTATTATTGTCAGCAGTATGGTTTCTCACTTTACAGTTTTGGCCAGGGGACCAAGCTGGAGATCAAAC	EIVLTQSPGTLSLAPGERATLSCRASQSVNSNYLAWYQQKPGQAPRLLIYGASSRATGIPDRFSGSGSGTDFTLTISRLEPEDFAVYYCQQYGFSLYSFGQGTKLEIK		381.4	n.d.	n.d.	n.d.	n.d.	n.d.	n.d.	n.d.	n.d.	n.d.	10.0409	99.1525
	C081	1.3m	VH3-15	JH4	GAGGTGCAGCTGGTGGAGTCTGGGGGAGGCTTGGTAAAGCCTGGGGGGTCCCTTAGACTCTCCTGTGCAGCCTCTGGATTCACTTTCAGTAGCGCCTGGATGAGCTGGGTCCGCCAGGCTCCAGGGAAGGGGCTGGAGTGGGTTGGCCGTATTAAAACCAAAACTGATGGTGGGACAAAAGACTACGCTGCACCCGTGAAAGGCAGATTCACCATCTCAAGAGATGATTCAAAAAACACGCTGTATCTGCAAATGAACAGCCTGAAAACCGAGGACACAGCCGTGTATTATTGTACCACAACTAACGACTACGGTGACTATTCGCCCGCCTACTGGGGCCAGGGAACCCTGGTCACCGTCTCCTCAG	EVQLVESGGGLVKPGGSLRLSCAASGFTFSSAWMSWVRQAPGKGLEWVGRIKTKTDGGTKDYAAPVKGRFTISRDDSKNTLYLQMNSLKTEDTAVYYCTTTNDYGDYSPAYWGQGTLVTVSS		VK1-39	JK4	GACATCCAGTTGACCCAGTCTCCATCCTCCCTGTCTGCATCTGTAGGAGACAGAGTCACCATCACTTGCCGGGCAAGTCAGAGCATTAGCAGCTATTTAAATTGGTATCAGCAGAAACCAGGGAAAGCCCCTAAGCTCCTGATCTATGCTGCATCCAGTTTGCAAAGTGGGGTCCCATCAAGGTTCAGTGGCAGTGGATCTGGGACAGCTTTCACTCTCACCATCAGCAGTCTGCAACCTGAAGATTTTGCAACTTACTACTGTCAACAGAGTTACAGTACCCCCCTCACTTTCGGCGGAGGGACCAAGGTGGAAATCAAAC	DIQLTQSPSSLSASVGDRVTITCRASQSISSYLNWYQQKPGKAPKLLIYAASSLQSGVPSRFSGSGSGTAFTLTISSLQPEDFATYYCQQSYSTPLTFGGGTKVEIK		12.47	6.851	6.513	8.356	6.844	4.14	6.133	7.235	8.33	6.11	309.732	>10000
	C083	1.3m	VH3-21	JH4	GAGGTGCAGCTGGTGGAGTCTGGGGGAGGCCTGGTCAAGCCTGGGGGGTCCCTGAGACTCTCCTGTGCAGCCTCTGGATTCACCTTCAGTAGCTATAGCATGAACTGGGTCCGCCAGGCTCCAGGGAAGGGGCTGGAGTGGGTCTCATCCATTAGTAGTAGTACTAGTTACATATACTACGCAGACTCAGTGAAGGGCCGATTCACCATCTCCAGAGACAACGCCAAGAACTCACTGTATCTGCAAATGAACAGCCTGAGAGCCGAGGACACGGCTGTGTATTACTGTGCGAGAGAACGCTACGGTGACAACTGGGGCCAGGGAACCCTGGTCACCGTCTCCTCAG	EVQLVESGGGLVKPGGSLRLSCAASGFTFSSYSMNWVRQAPGKGLEWVSSISSSTSYIYYADSVKGRFTISRDNAKNSLYLQMNSLRAEDTAVYYCARERYGDNWGQGTLVTVSS		VL4-69	JL3	CAGCTTGTGCTGACTCAATCGCCCTCTGCCTCTGCCTCCCTGGGAGCCTCGGTCAAGCTCACCTGCACTCTGAGCAGTGGGCACAGCAGCTACGCCATCGCATGGCATCAGCAGCAGCCAGAGAAGGGCCCTCGCTACTTGATGAGTCTTAACAGTGATGGCAGCCACAGCAAGGGGGACGGGATCCCTGATCGCTTCTCAGGCTCCAGCTCTGGGGCTGAGCGCTACCTCACCATCTCCAGCCTCCAGTCTGAGGATGAGGCTGACTATTACTGTCAGACCTGGGGCCCTTGGGTGTTCGGCGGAGGGACCAAGCTGACCGTCCTAG	QLVLTQSPSASASLGASVKLTCTLSSGHSSYAIAWHQQQPEKGPRYLMSLNSDGSHSKGDGIPDRFSGSSSGAERYLTISSLQSEDEADYYCQTWGPWVFGGGTKLTVL		25.12	n.d.	n.d.	n.d.	n.d.	n.d.	n.d.	n.d.	n.d.	n.d.	253.56	>10000
	C085	1.3m	VH4-59	JH5	CAGGTGCAGCTGCAGGAGTCGGGCCCAGGACTGGTGAAGCCTTCGGAGACCCTGTCCCTCACCTGCACTGTCTCTGGTGACTCCATGAGTAGTTATTTCTGGACCTGGATCCGGCAGCCCCCAGGGAAGGGACTGGAGTGCATTGGGTACTTCTATCCCAGTGGGAGCACCAACTACAACCCCTCCCTCAAGAGTCGAGTCACCATATCAATAGACACGTCCAAGAACCAGTTCTCCCTGAAGCTGAGCTCTGTGACCGCCGCAGACACGGCCGTCTATTACTGTGCGAGACTTAAACAACAACTGGTCGGCTTTGGGTGGTTCGACCCCTGGGGCCAGGGAACCCTGGTCACCGTCTCCTCAG	QVQLQESGPGLVKPSETLSLTCTVSGDSMSSYFWTWIRQPPGKGLECIGYFYPSGSTNYNPSLKSRVTISIDTSKNQFSLKLSSVTAADTAVYYCARLKQQLVGFGWFDPWGQGTLVTVSS		VL1-40	JL3	CAGTCTGTGCTGACTCAGCCGCCCTCAGTGTCTGGGGCCCCAGGGCAGAGGGTCACCATCTCCTGCACTGGGAGCAGCTCCAACATCGGGGCAGATTATGATGTACACTGGTATCAACAGTTTCCAGGAACAGCCCCCAAAGTCCTCATCTATGCTAACACCAATCGGCCCTCAGGGGTCCCTGAGCGATTCTCTGGCTCCAAGTCTGGCACCTCAGCCTCCCTGGCCATCACTGGGCTCCAGGCTGAGGATGAGGCTGATTATTACTGCCAGTCCTATGACCACAGCCTGAATTGGGTGTTCGGCGGAGGGACCAAGTTGACCGTCCTAG	QSVLTQPPSVSGAPGQRVTISCTGSSSNIGADYDVHWYQQFPGTAPKVLIYANTNRPSGVPERFSGSKSGTSASLAITGLQAEDEADYYCQSYDHSLNWVFGGGTKLTVL		2.38	2.727	4.296	>10000	3.72	3.925	2.551	2.188	2.184	1.971	17.1823	76.8919
	C086	6.2m	VH4-59	JH5	CAGGTGCAGCTGCAGGAGTCGGGCCCAGGACTGGTGAAGCCTTCGGAGACCCTGTCCCTCACCTGCACTGTCTCTGGTGACTCCATCAGTACTTATTTCTGGGCCTGGATCCGGCAGCCCCCAGGGAGGGGACTGGAGTGCATTGGATCCTTCTTTCCCAGTGGGAGCACCTACTACAACCCCTCCCTCAAGAGTCGAGTCACCATTTCAGTAGACACGTCCAAGAATCAGTTCTCCCTGAAGCTGAATTCTGTGACCGCCGCAGACACGGCCGTCTATTACTGTGCGAGACTTAAGCAACAACTGGTCGGCTTTGGGTGGTTCGACCCCTGGGGCCAGGGATCCCTGGTCACCGTCTCCTCAG	QVQLQESGPGLVKPSETLSLTCTVSGDSISTYFWAWIRQPPGRGLECIGSFFPSGSTYYNPSLKSRVTISVDTSKNQFSLKLNSVTAADTAVYYCARLKQQLVGFGWFDPWGQGSLVTVSS		VL1-40	JL2	CAGTCTGTGCTGACTCAGCCGCCCTCAGTGTCTGGGGCCCCAGGGCAGAGGGTCACCATCTCCTGCACTGGGAGCATCTCCAACATCGGGGCAGATTATGAAGTACACTGGTATGTGCAGTTTCCGGGAACAGCCCCCAAAGTCCTCATCTATGCTAACACCAATCGGCCCTCAGGGGTCCCTGAGCGATTCTCTGCCTCCAAGTCTGGCACCTCAGCCTCCCTGGCCATCACCGGGCTCCAGGCTGAGGATGAGGCTGATTATTACTGCCAGTCGTATGACCACAGGCTGCATTGGGTGTTCGGCGGAGGGACCAAGTTGACCGTCCTAG	QSVLTQPPSVSGAPGQRVTISCTGSISNIGADYEVHWYVQFPGTAPKVLIYANTNRPSGVPERFSASKSGTSASLAITGLQAEDEADYYCQSYDHRLHWVFGGGTKLTVL		3.008	3.08	5.363	456	3.183	2.867	2.675	2.605	2.848	2.389	7.01674	40.8843
	C088	6.2m	VH1-46	JH5	CAGGTGCAGCTGGTGCAGTCTGGGGCTGAGGCGAAGAAGCCTGGGGCCTCAGTGAAGGTTTCCTGCAAGACATCTGGATACACCTTCACCAACTACTTTATGCACTGGGTGCGACAGGCCCCTGGACAAGGGCCTGAGTGGATGGGAATAATCGACTCTAGTGATGGTGGCGCAAGCTACGCACAGAAGTTCCAGGGCAGAGTCACCATGACCAGGGACACGTCCACGAGCACAGTCTACATGGAACTGCGCAGCCTGAAATTTGAAGACACGGCCGTGTATTATTGTGCTAGAGCGTCGACCTCCACTACTAGCTGGAGCGACGCCCTGTCCTTGGGTTCCTGGGGCCAGGGAACCCTGGTCACCGTCTCCTCAG	QVQLVQSGAEAKKPGASVKVSCKTSGYTFTNYFMHWVRQAPGQGPEWMGIIDSSDGGASYAQKFQGRVTMTRDTSTSTVYMELRSLKFEDTAVYYCARASTSTTSWSDALSLGSWGQGTLVTVSS		VL1-40	Jl2	CAGTCTGTGCTGACTCAGCCGCCCTCAGTGTCTGGGGCCCCAGGGCAGAGGGTCACCATCTCCTGCACTGGGAGCAGCTCCAATATTGGGGGGGGTTCCGTTGTACATTGGTACCAGCAGCTTCCAGGAACAGCCCCCAAACTCCTCATCTATGCTAACAGCAATCGGCCCTCAGGGGTCCCTGACCGATTCTCTGGCTCCAAGTCTGGCACCTCAGCCTCCCTGGCCATCGCTGGGCTCCAGGCTGAGGATGAGGCTGATTATTACTGCCAGTCCTGGGACAACGGCCTGAGTGCTTCGGGGGTGGTCTTCGGCGGAGGGACCAAGCTGACCGTCCTAG	QSVLTQPPSVSGAPGQRVTISCTGSSSNIGGGSVVHWYQQLPGTAPKLLIYANSNRPSGVPDRFSGSKSGTSASLAIAGLQAEDEADYYCQSWDNGLSASGVVFGGGTKLTVL		2.441	n.d.	n.d.	n.d.	n.d.	n.d.	n.d.	n.d.	n.d.	n.d.	14.5381	47.1518
	C089	1.3m	VH3-33	JH4	CAGGTGCAGCTGGTGGAGTCTGGGGGAGGCGTGGTCCAGCCTGGGAGGTCCCTGAGACTCTCCTGTGCAGCGTCTGGTTTCACCTTCCGTACCTATGCCATGCACTGGGTCCGCCAGGCTCCAGGCAAGGGGCTGGAGTGGGTGGCAGTTATATTGTCTGATGGAAATAATAAATATTATGCAGACTCTGTGAAGGGCCGATTCACCATCTCCAGAGACAATTCCAAGAACACGCTTTATCTGCAAATGAACAGCCTGAGAGCCGAGGACACGGCTATCTTTTACTGTGCGAGAGAACAGGAGGCGAATTACTATGATATTAGTGGTTATTACCACTGGGGGGAGTCGTTAGGGTACTGGGGCCAGGGAACCCTGGTCACCGTCTCCTCAG	QVQLVESGGGVVQPGRSLRLSCAASGFTFRTYAMHWVRQAPGKGLEWVAVILSDGNNKYYADSVKGRFTISRDNSKNTLYLQMNSLRAEDTAIFYCAREQEANYYDISGYYHWGESLGYWGQGTLVTVSS		VK1-9	VK4	GACATCCAGTTGACCCAGTCTCCATCCTTCCTGTCTGCATCTGTAGGAGACAGAGTCACCATCACTTGCCGGGCCAGTCAGGGCATTAGCAGTTATTTAGCCTGGTATCAGCAAAAACCAGGCAAAGCCCCTAAGCTCCTGATCTATGGTGCATCCACTCTGCAAAGTGGGGTCCCATCAAGGTTCAGCGGCAGTGGATCTGGGACAGAATTCACTCTCACAATCAGCAGCCTGCAGCCTGAAGATTTTGCAAGTTATTACTGTCAAAAGGTTAATAGTCACCCTCCAGGGCTCACTTTCGGCGGAGGGACCAAGGTGGAAATCAAAC	DIQLTQSPSFLSASVGDRVTITCRASQGISSYLAWYQQKPGKAPKLLIYGASTLQSGVPSRFSGSGSGTEFTLTISSLQPEDFASYYCQKVNSHPPGLTFGGGTKVEIK		4.694	9.324	>10000	11.64	40.61	49.85	58.56	10	10.74	125.3	>10000	>10000
	C090	6.2m	VH3-33	JH4	CAGGTGCAGCTGGTGGAGTCTGGGGGAGGCGTGGTCCAGCCTGGGAGGTCCCTGAGACTCTCCTGTGCAGCGTCTGGTTTCACCTTCCGTACCTATGCCATGCACTGGGTCCGCCAGGCTCCAGGCAAGGGGCTGGAGTGGGTGGCAGTTATATTGTCTGATGGAAATAATAAATATTATGCAGACTCTGTGAAGGGCCGATTCACCATCTCCAGAGACAATTCCAAGAACACGCTGTATCTGCAAATGAACAGCCTGAGAGCCGAGGACACGGCTATCTTTTACTGTGCGAGAGAACAGGAGGCGAATTACTATGATATTAGTGGTTATTACCACTGGGGGGAGTCGTTAGGGTACTGGGGCCAGGGAACCCTGGTCACCGTCTCCTCAG	QVQLVESGGGVVQPGRSLRLSCAASGFTFRTYAMHWVRQAPGKGLEWVAVILSDGNNKYYADSVKGRFTISRDNSKNTLYLQMNSLRAEDTAIFYCAREQEANYYDISGYYHWGESLGYWGQGTLVTVSS		VK1-9	VK4	GACATCCAGTTGACCCAGTCTCCATCCTTCCTGTCTGCATCTGTAGGAGACAGAGTCACCATCACTTGCCGGGCCAGTCAGGGCATTAGCAGTTATTTAGCCTGGTATCAGCAAAAACCAGGCAAAGCCCCTAAGTTCCTGATCTATGGTGCATCCACTCTGCAAAGTGGGGTCCCATCAAGGTTCAGCGGCAGTGGATCTGGGACAGAATTCACTCTCACAATCAGCAGCCTGCAGCCTGAAGATTTTGCAAGTTATTACTGTCAAAAGGTTAATAGTTACCCTCCAGGGCTCACTTTCGGCGGAGGGACCAAGGTGGAAATCAAAC	DIQLTQSPSFLSASVGDRVTITCRASQGISSYLAWYQQKPGKAPKFLIYGASTLQSGVPSRFSGSGSGTEFTLTISSLQPEDFASYYCQKVNSYPPGLTFGGGTKVEIK		6.216	11.82	40.01	18.65	31.23	100.2	42.96	10.51	9.695	84.08	>10000	>10000
	C518	6.2m	VH3-53	JH6	GAGGTGCAGCTGGTGGAGTCTGGAGGAGGCTTGATCCAGCCTGGGGGGTCCCTGAGACTCTCCTGTGCAGCCTCTGGGATCACCGTCAGTAGCAACTACATGAGCTGGGTCCGCCAAGCTCCAGGGAAGGGGCTGGAGTGGGTCTCAGTTATGTATGCCGGTGGTAGCTCGTTCTACGCAGACTCCGTGAAGGGCCGATTCACCATCTCCAGAGACAATTCGAAGAACACATTGTATCTTCAAATGAACAGCCTGAGAGTCGAGGACACGGCCGTGTACTACTGTGCGAGAGATCTGATTGCCCTTGGGGTGGACGTCTGGGGCCAAGGGACCACGGTCACCGTCTCCTCA	EVQLVESGGGLIQPGGSLRLSCAASGITVSSNYMSWVRQAPGKGLEWVSVMYAGGSSFYADSVKGRFTISRDNSKNTLYLQMNSLRVEDTAVYYCARDLIALGVDVWGQGTTVTVSS		VK1-9	JK2	GACATCCAGTTGACCCAGTCTCCATCCTTCCTGTCTGCATCTGTAGGAGACAGAGTCACCATCACTTGCCGGGCCAGTCAGGGCATTAGCAGTTATTTAGCCTGGTATCAGCAAAAACCAGGGAAAGCCCCTAAGCTCCTGATCTATGCTGCATCCACTTTGCAAAGTGGGGTCCCATCTAGGTTCAGCGGCAGTGGATCTGGGACAGAATTCACTCTCACAATCAGCAGCCTGCAGCCTGAAGATTTTGCAACTTATTACTGTCAACTGCTTAATAGTTACCCCATGTGCAGTTTTGGCCAGGGGACCAAGCTGGAGATCAAAC	DIQLTQSPSFLSASVGDRVTITCRASQGISSYLAWYQQKPGKAPKLLIYAASTLQSGVPSRFSGSGSGTEFTLTISSLQPEDFATYYCQLLNSYPMCSFGQGTKLEIK		1.13	n.d.	n.d.	n.d.	n.d.	n.d.	n.d.	n.d.	n.d.	n.d.	31.0298	78.5261
	C519	6.2m	VH4-4	JH4	CAGGTGCAGCTGCAGGAGTCGGGCCCAGGACTGGTGAAGCCTTCGGAGACCCTGTCCCTCACCTGCGCTGTCTCTGGTGGCTCCATCAGTAGTTATTACTGGAGTTGGATCCGGCAGCCTCCAGGGAAGGGACTGGAGTGGATTGGGTACATCGATACCAGTGGGAGCACCAACTACAACCCCTCCCTCAAGAGTCGAGTCACCATGTCAGTCGACACGTCCAAGAATCAGTTCTCTCTGAACGTGAACTCTGTGACCGCCGCAGACACGGCCGTGTATTTCTGTGGTGTTTGTGCTGGTGACTGCTATGCCGCCTCGGTCTTTGACTACCGGGGCCAGGGAACCCTGGTCACCGTCTCCTCAG	QVQLQESGPGLVKPSETLSLTCAVSGGSISSYYWSWIRQPPGKGLEWIGYIDTSGSTNYNPSLKSRVTMSVDTSKNQFSLNVNSVTAADTAVYFCGVCAGDCYAASVFDYRGQGTLVTVSS		VK1-33	JK4	GACATCCAGATGACCCAGTCTCCATCCTCCCTGTCTGCATCTGTAGGAGACAGAGTCACCATCACTTGCCAGGCGAGTCAGGACATTATCTTCTATTTAAATTGGTATCAGCAGAAACCAGGGAAAGCCCCTAAGCTCCTGATCTACGATGCATCCAATTTGAAAACAGGGGTCCCATCAAGGTTCAGTGGAAGTGGATCTGGGACAGATTTTGCTTTCACCATCAGCAGCCTGCAGCCTGAAGATATTGCAACATATTACTGTCAACAGTATGATAATCTCCCTCTCACTTTCGGCGGAGGGACCAAGGTGGAGATCAAAC	DIQMTQSPSSLSASVGDRVTITCQASQDIIFYLNWYQQKPGKAPKLLIYDASNLKTGVPSRFSGSGSGTDFAFTISSLQPEDIATYYCQQYDNLPLTFGGGTKVEIK		1.065	n.d.	n.d.	n.d.	n.d.	n.d.	n.d.	n.d.	n.d.	n.d.	23.8056	192.331
COV72	C501	6.2m	VH1-58	JH3	CAGGTGCAGCTGGTGCAGTCTGGGCCTGAGGTGAAGAAGCCTGGGACCTCAGTGAAGGTCTCCTGCAAGGCTTCCGGATTCACCTTTGGCAGTTCTGCTGTTCAGTGGGTGCGACAGGCTCGTGGACAACGCCTTGAGTGGATAGGATGGATCGTCGTTGGCAGTGGTAACACAGATTACGCACAGAGGTTTCAGGAAAGAGTCACCATCACCAGGGACATGTCCACAAACACAGTCTACATGGAGCTGAGCAGCCTGAGATTCGAGGACACGGCCGTGTATTACTGTGCGGCAGTGTATTGTAGTGGGACCACCTGCCATGATGCATTTGACATCTGGGGCCGGGGGACAATGGTCACCGTCTCTTCAG	QVQLVQSGPEVKKPGTSVKVSCKASGFTFGSSAVQWVRQARGQRLEWIGWIVVGSGNTDYAQRFQERVTITRDMSTNTVYMELSSLRFEDTAVYYCAAVYCSGTTCHDAFDIWGRGTMVTVSS		VK1	JK2	GACATCCAGATGACCCAGTCTCCATGCTCCCTGTCTGCATCTGTAGGAGACAGAGTCACCATCACTTGCCAGGCGACTCAGGACATTAGGAAGTATTTAAATTGGTTTCGGCGGAAACTAGAGAAAGCCCCTAAACTCCTGATCTACGATGCATCCACTTTGGATACAAGAGTCCCATCCAGGTTCAGTGGGAATAGATCTGCGACAGATTTTACTTTCACCATCTGCAGCCTGCAGCCTGAAGATAATGCAAGATATTCCTGTCAACAGTCTGACACTCTCCCTCCCCTTGGTGGCGACACACCGGACACTTTTGGCCACGGGACCAAGCTGGAGATCAAAC	DIQMTQSPCSLSASVGDRVTITCQATQDIRKYLNWFRRKLEKAPKLLIYDASTLDTRVPSRFSGNRSATDFTFTICSLQPEDNARYSCQQSDTLPPLGGDTPDTFGHGTKLEIK		>10000	n.d.	n.d.	n.d.	n.d.	n.d.	n.d.	n.d.	n.d.	n.d.	>10000	>10000
	C502	6.2m	VH1-69	JH3	CAGGTGCAGCTGGTGCAGTCTGGGGCTGAGGTGAAGAAGCCTGGGTCCTCGGTGAAGGTCTCCTGCAAGGCTTCTGGAGACACCTTCAGCAGCCATGCTATCAACTGGGTGCGACAGGCCCCTGGACAAGGGCTTGAGTGGATGGGAAGGAGCATCCCTATGCTTGGCGTAACAACCTCCGCACAGAAGTTCAAGGGCAGAGTCACGATTACCGCGGACCACTCCACGAGCACAGTCTTCATGGATCTGAGCAGCCTGAGATCTGACGACACGGCCATTTATTACTGTGCACGAGGGGTGGTAGGTGCTACTCCGGGGAGTTTTGATCTCTGGGGCCAAGGGACAATGGTCACCGTCTCTTCAG	QVQLVQSGAEVKKPGSSVKVSCKASGDTFSSHAINWVRQAPGQGLEWMGRSIPMLGVTTSAQKFKGRVTITADHSTSTVFMDLSSLRSDDTAIYYCARGVVGATPGSFDLWGQGTMVTVSS		VK3-15	JK4	GAAATAGTGATGACGCAGTCTCCAGCCACCCTGTCTGTGTCTCCAGGGAAAAGAGCCACCCTCTCCTGCAGGGCCAGTCAGAGTGTTAGGAGCAACTTAGCCTGGTACCAGCAGAGACCTGGCCAGGCTCCCAGGCTCCTCATCTATGATGCAGCCACCAGGGCCACTGGTATCCCAACCAGGTTCAGTGGCAGTGGGTCTGGGACAGAGTTCACTCTCACCATCAGCAGCCTGCAGTCTGAAGATTTTGCAGTTTATTACTGTCAGCAGTATGATAACGGGCTCACTTTCGGCGGAGGGACCAAGGTGGAGATCAAAC	EIVMTQSPATLSVSPGKRATLSCRASQSVRSNLAWYQQRPGQAPRLLIYDAATRATGIPTRFSGSGSGTEFTLTISSLQSEDFAVYYCQQYDNGLTFGGGTKVEIK		6.477	n.d.	n.d.	n.d.	n.d.	n.d.	n.d.	n.d.	n.d.	n.d.	12.4854	38.4646
	C503	6.2m	VH4-4	JH5	CAGGTGCAGCTGCAGGAGTCGGGCCCAGGACTGGTGCAGCCTTCGGGGACCCTGTCCCTCAGTTGCACTGTCACTGGTGGCTCCATCAGCAGCAATAACTGGTGGAGTTGGGTCCGCCAGTCCCCAGTGAAGGGACTGGAATGGATTGGGGAAATCTATCATAATGGAAATATCAACTACAACCCGTCCCTCAAGAGTCGAGTCACCATGTCCATAGACAAGTCCAAGAACCACTTCTCCCTGAAGCTGAGCTCTGTGACCGCCGCGGACACGGCCGTGTATTACTGTGCGAGAGGCGATGTTTTAGACTGGTTCGACCCCTGGGGCCAGGGAACCCTGGTCACCGTCTCCTC	QVQLQESGPGLVQPSGTLSLSCTVTGGSISSNNWWSWVRQSPVKGLEWIGEIYHNGNINYNPSLKSRVTMSIDKSKNHFSLKLSSVTAADTAVYYCARGDVLDWFDPWGQGTLVTVS		VL2-14	JL2	CAGTCTGCCCTGACTCAGCCTGCCTCCGTGTCTGGGTCTCCTGGACAGTCGATCACCTTCTCCTGCACTGGAACCAGCAGTGACGTTGGAGCTTACAACTATATCTCCTGGTACCAACAGCACCCCGGCAAAGCCCCCAAACTCATGATTTATGATGTCAATAACCGGCCCTCAGGGGTTTCTAGGCGCTTCTCTGGCTCCAAGTCTGGCAACACGGCCTCCCTGACCATCTCTGGGCTCCAGTCTGAGGACGAGGCTGATTATTTCTGCAGTTCATATGCAGGCAACAGCACCGTCCGATTCGGCGGAGGGACCAAGCTGACCGTCCTA	QSALTQPASVSGSPGQSITFSCTGTSSDVGAYNYISWYQQHPGKAPKLMIYDVNNRPSGVSRRFSGSKSGNTASLTISGLQSEDEADYFCSSYAGNSTVRFGGGTKLTVL		6.549	n.d.	n.d.	n.d.	n.d.	n.d.	n.d.	n.d.	n.d.	n.d.	21.5702	81.3175
	C504	6.2m	VH4-59	JH4	CAGGTGCAGCTGCAGGAGTCGGGCCCAGGACTGGTGAAGCCTTCGGAGACCCTGTCCCTCACCTGCACTGTCTCTGGTGGCTCCATCAGTAGTTCCTACTGGAACTGGATCCGGCAGTCCCCAGGGAAGGGACTGGAGTGGATTGGTTATATCTATTACGATGGCTACACCACCTTCAACCCCTCCCTCAAGAGTCGAGTCACCATATCAGTAGACACGTCCAAGAACCAATTCTCCCTGAAACTGAGCTCTGTGACCGCCGCAGACACGGCCTTCTATTACTGTGCCGCGGGGCTTAAGGGGCGTAGCAGCAGCTGGTACGAGTACTGGGGCCAGGGAACCCTGGTCACCGTCTCCTCAG	QVQLQESGPGLVKPSETLSLTCTVSGGSISSSYWNWIRQSPGKGLEWIGYIYYDGYTTFNPSLKSRVTISVDTSKNQFSLKLSSVTAADTAFYYCAAGLKGRSSSWYEYWGQGTLVTVSS		VK1-39	JK2	GACATCCAGATGACCCAGTCTCCATCCTCCCTGTCTGCATCTGTAGGAGACAGAGTCACCATCACTTGCCGGGCAAGTCAGAGCATTAGCAGCTATTTAAATTGGTATCAGCAGAAACCAGGGAAAGCCCCTAAGCTCCTGATCTATGCTACATCCAGTTTGCAAAGTGGGGTCCCTTCAAGGTTCAGTGGCAGTGGATCTGGGACAGATTTCACTCTCACCATCACCAGTCTACAACCTGAAGATTTTGCAACTTACTATTGTCAACAGACTTACAGTTCCCCTCACACTTTTGGCCAGGGGACCAAGCTGGAGATCAAAC	DIQMTQSPSSLSASVGDRVTITCRASQSISSYLNWYQQKPGKAPKLLIYATSSLQSGVPSRFSGSGSGTDFTLTITSLQPEDFATYYCQQTYSSPHTFGQGTKLEIK		9.082	n.d.	n.d.	n.d.	n.d.	n.d.	n.d.	n.d.	n.d.	n.d.	>10000	>10000
	C505	6.2m	VH3-23	JH6	GAGGTGCAGCTGTTGGAGTCTGGGGGAGGCTTGGTACAGCCTGGGGGGTCCCTGAGACTCTCCTGTGCAGACTCTGGATTCAGTTTTAGCACTTATGGCATGAGCTGGGTCCGCCAGGCTCCAGGGAAGGGGCTGGAGTGGGTCTCAACGATTAGTGGAAGTGGTGATAACACATACCACGCAGACTCCGTGAAGGGCCGGTTCACCATCTCCAGAGACAATTCCAAAAATACGCTGTATCTGCAAATGAACAGCCTGAGAGCCGAGGACACGGCCGTATATTACTGTGCGAAAAACATTGCAGAGATGTCTACGTTTGATGATTATTTCTACTACTACGGTATGGACGTCTGGGGCCAAGGGACCACGGTCACCGTCTCCTCA	EVQLLESGGGLVQPGGSLRLSCADSGFSFSTYGMSWVRQAPGKGLEWVSTISGSGDNTYHADSVKGRFTISRDNSKNTLYLQMNSLRAEDTAVYYCAKNIAEMSTFDDYFYYYGMDVWGQGTTVTVSS		VL3-1	JL1	TCCTATGAGCTGACACAGCCACCCTCAGTGTCCGTGTCCCCAGGACAGACAGCCAGCATCACCTGCTCTGGAGATAAATTGGGGGATAAATATGCTTGCTGGTATCAGCAGAAGCCAGGCCAGTCCCCTGTGATGGTCATCTATCAAGATACCAAGCGGCCCTCAGGGATCCCTGAGCGATTCTCTGGCTCCAACTCTGGGAACACAGCCACTCTGACCATCAGCGGGACCCAGGCTATGGATGAGGCTGACTATTACTGTCAGGCGTGGGACAGCAGCACTTTTTATGTCTTCGGAACTGGGACCAAGGTCACCGTCCTAG	SYELTQPPSVSVSPGQTASITCSGDKLGDKYACWYQQKPGQSPVMVIYQDTKRPSGIPERFSGSNSGNTATLTISGTQAMDEADYYCQAWDSSTFYVFGTGTKVTVL		15.98	n.d.	n.d.	n.d.	n.d.	n.d.	n.d.	n.d.	n.d.	n.d.	234.423	>10000
	C506	6.2m	VH3-13	JH2	GAGGTGCAGCTGGTGGAGTCTGGGGGAGGCTTGGTACAGCCTGGGGGGTCCCTGAGACTCTCCTGTGCAGCCTCTGGATTCACCTTCAGTAGCTACGACATGCACTGGGTCCGCCAAGGTACAGGAAAAGGTCTGGAGTGGGTCTCAGTTATTGGTACTGCTGGTGACGCATACTATCCAGGCTCCGTGAAGGGCCGATTCACCATCTCCAGAGAAAATGCCAAGAACTCCTTGTATCTTCAAATGAACAGCCTGAGAGCCGGGGACACGGCTGTGTATTACTGTGCAAGAATGGTCTATGATAGTAGTGGTTTCAAGGGGTACTTCGATCTCTGGGGCCGTGGCACCCTGGTCACCGTCTCCTCAG	EVQLVESGGGLVQPGGSLRLSCAASGFTFSSYDMHWVRQGTGKGLEWVSVIGTAGDAYYPGSVKGRFTISRENAKNSLYLQMNSLRAGDTAVYYCARMVYDSSGFKGYFDLWGRGTLVTVSS		VK1-39	JK2	GACATCCAGATGACCCAGTCTCCATCCTCCCTGTCTGCATCTGTAGGAGACAGAGTCACCATCACTTGCCGGGCAAGTCAGAGCATTAGCAGCTATTTAAATTGGTATCAGCAGAAACCAGGGAAAGCCCCTAAGCTCCTGATCTATGCTGCATCCAGTTTGCAAAGTGGAGTCCCATCAAGGTTCAGTGGCAGTGGATCTGGGACAGATTTCACTCTCACCATCAGCAATCTGCAACCTGAAGATTTTGCAACATACTACTGTCAACAGAGTTACAGTACCTCCATGTACACTTTTGGCCAGGGGACCAAGCTGGAGATCAAAC	DIQMTQSPSSLSASVGDRVTITCRASQSISSYLNWYQQKPGKAPKLLIYAASSLQSGVPSRFSGSGSGTDFTLTISNLQPEDFATYYCQQSYSTSMYTFGQGTKLEIK		5.942	n.d.	n.d.	n.d.	n.d.	n.d.	n.d.	n.d.	n.d.	n.d.	>10000	>10000
	C507	6.2m	VH3-30	JH4	GAGGTGCAGCTGGTGGAGTCTGGGGGAGGCGTGGTCCAGCCTGGGAGGTCCCTGAGACTCTCCTGTGCAGCCTCTGGATTCACCTTCAGTAGTTATGCCATACACTGGGTCCGCCAGGCTCCAGGCAAGGGGCTGGAGTGGGTGGCAGTTATATCATTTGATGGAAGTAATAAATACTATAGAGACTCCGTGAAGGGCCGATTCACCATCTCCAGAGACAATGGCAAGAACACGCTGTATCTGCAAATGAACAGCCTGAGAGCTGAGGACACGGCTGTGTATTACTGTGCGAAAGCAGCCTTAGGATATTGTACTAATGGTGTATGCTATTGCGACAACTGGGGCCAAGGAACCCTGGTCACCGTCTCCTCAG	EVQLVESGGGVVQPGRSLRLSCAASGFTFSSYAIHWVRQAPGKGLEWVAVISFDGSNKYYRDSVKGRFTISRDNGKNTLYLQMNSLRAEDTAVYYCAKAALGYCTNGVCYCDNWGQGTLVTVSS		VL6-57	JL3	AATTTTATGCTGACTCAGCCCCACTCTGTGTCGGAGTCTCCGGGGAAGACGGTAACCATCTCCTGCACCGGTAGCAGTGGCAGCATTGCCAGCAACTATGTGCAGTGGTACCAACAGCGCCCGGGCAGTGCCCCCACCACTGTAATCTATGAGGATAACCAAAGACCCTCTGGGGTCCCTGATCGGTTCTCTGGCTCCATCGACAGCTCCTCCAACTCTGCCTCCCTCAGCATCTCTGGACTGAAGACTGAGGACGAGGCTGACTACTACTGTCAGTCTTATGATATCAACAGTCTTTGGGTGTTCGGCGGGGGGACCAGGCTGACCGTCCTAG	NFMLTQPHSVSESPGKTVTISCTGSSGSIASNYVQWYQQRPGSAPTTVIYEDNQRPSGVPDRFSGSIDSSSNSASLSISGLKTEDEADYYCQSYDINSLWVFGGGTRLTVL		5.602	n.d.	n.d.	n.d.	n.d.	n.d.	n.d.	n.d.	n.d.	n.d.	1102.33	>10000
	C508	6.2m	VH4-39	JH4	CAGCTGCAGCTGCAGGAGTCGGGCCCAGGACTGGTGAAGCCTTCGGAGACCCTGTCCCTCACCTGCACTGTCTCTGGTGCCTCCATCAGGAATAGTAATTACTTCTGGGGCTGGATCCGCCAGCCCCCAGGGAAGGGACTGCAGTGGATTGGGAGTATCTATTATAGTGGGAGCACCTCGTACAACCCGTCCCTCAGGACTCGAGTCACCGTTTCCGTAGACACGTCCAAGAACCAGTTCTCCCTGAAGCTGAGCTCTGTGACCGCCGCAGACACGGCTGTATATTACTGTGCGAGACCCCGAGCCGGGGGGGATAGCAGTTTCTTCTGGGACTCCTGGGGCCGGGGAACCCTGGTCACCGTCTCCTCAG	QLQLQESGPGLVKPSETLSLTCTVSGASIRNSNYFWGWIRQPPGKGLQWIGSIYYSGSTSYNPSLRTRVTVSVDTSKNQFSLKLSSVTAADTAVYYCARPRAGGDSSFFWDSWGRGTLVTVSS		VL2-14	JL3	CAGTCTGCCCTGACTCAGCCTGCCTCCGTGTCTGGGTCTCCTGGACAGTCGATCACCATCTCCTGCACTGGAACCAGCAGTGACGTTGGTGGTTATAACTATGTCTCCTGGTACCAACAACACCCAGGCAAAGCCCCCAAACTCATGATTTATGATGTCAGTAATCGGCCCTCAGGGGTTTCTAATCGCTTCTCTGGCTCCAAGTCTGGCAACACGGCCTCCCTGACCATCTCTGGGCTCCAGGCTGAGGACGAGGCTGATTATTACTGCAGCTCATATACAAGCAGCAGCACTATGGTGTTCGGCGGAGGGACCAAGCTGACCGTCCTAG	QSALTQPASVSGSPGQSITISCTGTSSDVGGYNYVSWYQQHPGKAPKLMIYDVSNRPSGVSNRFSGSKSGNTASLTISGLQAEDEADYYCSSYTSSSTMVFGGGTKLTVL		>10000	n.d.	n.d.	n.d.	n.d.	n.d.	n.d.	n.d.	n.d.	n.d.	>10000	>10000
	C509	6.2m	VH4-4	JH5	CAGGTGCAGCTGCAGGAGTCGGGCCCAGGACTGGTGAAGCCTTCGGGGACCCTGTCCCTCACCTGCGCTGTCTCTGGTGGCTCCATCAGCAGTAGTAACTGGTGGAGTTGGGTCCGCCAGCCCCCAGGGAAGGGGCTGGAGTGGATTGGGGAAATCTATAATAGTGGGAGCACCAACTACAACCCGTCCCTCAAGAGTCGAGTCACCATATTAGTAGACAAGTCCAAGAACCAGTTCTCCCTGAAGCTGAGCTCTGTGACCGCCGCGGACACGGCCGTGTATTACTGTGCGGGTTCATACAGTAACTACATCGGGGGGGTCTGGTTCGACCCCTGGGGCCAGGGAACCCTGGTCACCGTCTCCTCAG	QVQLQESGPGLVKPSGTLSLTCAVSGGSISSSNWWSWVRQPPGKGLEWIGEIYNSGSTNYNPSLKSRVTILVDKSKNQFSLKLSSVTAADTAVYYCAGSYSNYIGGVWFDPWGQGTLVTVSS		VK3-11	JK4	GAAATTGTGTTGACACAGTCTCCAGCCACCCTGTCTTTGTCTCCAGGGGAAAGAGCCACCCTCTCCTGCAGGGCCAGTCAGAGTGTTAGCACCTACTTAGCCTGGTACCAACAGAAACCTGGCCAGGCTCCCAGGCTCCTCATCTATGATGCATCCAATAGGGCCACTGGCATCCCAGCCAGATTCAGTGGCAGTGGGTCTGGGACAGACTTCACTCTCACCATCAGCAGCCTAGAGCCTGAAGATTTTGCAGTTTATTACTGTCAGCAGCGTAACAACTGGCTCACTTTCGGCGGAGGGACCAAGGTGGAAATCAAAC	EIVLTQSPATLSLSPGERATLSCRASQSVSTYLAWYQQKPGQAPRLLIYDASNRATGIPARFSGSGSGTDFTLTISSLEPEDFAVYYCQQRNNWLTFGGGTKVEIK		4.439	n.d.	n.d.	n.d.	n.d.	n.d.	n.d.	n.d.	n.d.	n.d.	14.2126	112.094
	C510	6.2m	VH4-34	JH6	CAGGTGCAGCTACAGCAGTGGGGCGCAGGACTGTTGAAGCCTTCGGAGACCCTGTCCCGCACCTGCGCTGTTTATGGTGGGTCCTTCAGTGGTTACTACTGGAGCTGGTTCCGCCAGTCCCCAGGGAAGGGGCTGGAGTGGATTGGGGAAATCAATCATAGTGGAAGCACCAATTACAACCCGTCCCTCAAGAATCGAGTCACCATATCAGTAGACACGTCCAAGAACCAGTTCTCCCTGATGCTGAGCTCTGTGACCGCCGCGGACACGGCTGTGTATTACTGTGCGAGAGGCGGCTTTGGAGTGGTTATCAACTACTACTACTCCGGTATGGACGTCTGGGGCCGAGGGACCACGGTCACCGTCTCCTCA	QVQLQQWGAGLLKPSETLSRTCAVYGGSFSGYYWSWFRQSPGKGLEWIGEINHSGSTNYNPSLKNRVTISVDTSKNQFSLMLSSVTAADTAVYYCARGGFGVVINYYYSGMDVWGRGTTVTVSS		VK2-28	JK1	GATATTGTGATGACTCAGTCTCCACTCTCCCTGCCCGTCACCCCTGGAGAGCCGGCCTCCATCTCCTGCAGGTCTAGTCAGAGCCTCCTGCATAGTAATGGATACAATTATTTGGATTGGTACCTGCAGAAGTCAGGGCAGTCTCCACAGCTCCTGATCTATTTGGGTTCTAATCGGGCCTCCGGGGTCCCTGACAGGTTCAGTGGCAGTGGATCAGGCACAGATTTTACACTGAAAATCAGCAGAGTGGAGGCTGAAGATGTTGGGGTTTATTACTGCATGCAAGCTCTACAAACTCCTCCGACGTTCGGCCAAGGGACCAAGGTGGAAATCAAAC	DIVMTQSPLSLPVTPGEPASISCRSSQSLLHSNGYNYLDWYLQKSGQSPQLLIYLGSNRASGVPDRFSGSGSGTDFTLKISRVEAEDVGVYYCMQALQTPPTFGQGTKVEIK		308.5	n.d.	n.d.	n.d.	n.d.	n.d.	n.d.	n.d.	n.d.	n.d.	>10000	>10000
	C511	6.2m	VH3-66	JH4	GAGGTGCAGCTGGTGGAGTCTGGGGGAGGCTTGGTCCAGCCTGGGGGGTCCCTGAGACTCTCCTGTGCAGCCACTGAAATCACCGTCAGTAGCAACTACATGACCTGGGTCCGCCAGGCTCCAGGGAAGGGGCTGGAGTGGGTCTCAGTTATTTATCCTGGTGGCAGCACATTCTACGCAGACTCCGTGAAGGGCAGATTCTCCATCTCCAGAGACAATTCCAAGAACACTCTGTATCTTCAAATGAACAGCCTGAGAGCCGAGGACACGGCTGTGTATTACTGTGCGAGAGATTTAGTTGTCTATGGACTTGACTGCTGGGGCCAGGGAACCCTGGTCACCGTCTCCTCAG	EVQLVESGGGLVQPGGSLRLSCAATEITVSSNYMTWVRQAPGKGLEWVSVIYPGGSTFYADSVKGRFSISRDNSKNTLYLQMNSLRAEDTAVYYCARDLVVYGLDCWGQGTLVTVSSEVQLVESGGGLVQPGGSLRLSCAATEITVSSNYMTWVRQAPGKGLEWVSVIYPGGSTFYADSVKGRFSISRDNSKNTLYLQMNSLRAEDTAVYYCARDLVVYGLDCWGQGTLVTVSS		VK1-9	JK4	GACATCCAGTTGACCCAGTCTCCATCCTTCCTGTCTGCATCTGTAGGAGACAGAGTCACCATCACTTGCCGGGCCAGTCAGGGCATTAGCAGTTATTTAGCCTGGTATCAGCAAAAACCAGGGAAAGCCCCTAAGCTCCTGATCTATGCTGCATCCACTTTGCAAAGTGGGGTCCCATCAAGGTTCAGCGGCAGTGGATCTGGGACAGAATTCACTCTCACAATCAGCAGCCTGCAGCCTGAAGATTTTGCAACTTATTACTGTCAACAGCTTAATACTTACCCCCCTCCTTTCGGCGGAGGGACCAAGGTGGAGATCAAAC	DIQLTQSPSFLSASVGDRVTITCRASQGISSYLAWYQQKPGKAPKLLIYAASTLQSGVPSRFSGSGSGTEFTLTISSLQPEDFATYYCQQLNTYPPPFGGGTKVEIK		1.33	0.9596	1.243	1.434	0.9147	1.208	1.268	0.963	1.125	1.123	28.8257	89.1429
	C512	6.2m	VH4-4	JH4	CAGGTGCAGCTGCAGGAGTCGGGCCCAGGACTGGTGAAGCCTTCGGGGACCCTGTCCCTCACCTGCGCTGTCTCTGCTGGCTCCATCAGCAGTAATAACTGGTGGAGTTGGGTCCGCCAGCCCCCAGGGAAGGGGCTGGAATGGATTGGAGAAGTCTATCATAATGGCAATATCAACTACAACCCGTCCCTCAAGAGTCGAGTCACCCTGTCAGTAGACAAGTCCAAGAACCAGTTCTCCCTGAAGTTGAGCTCTGTGACCGCCGCGGACACGGCCGTGTATTACTGTGCGAAAGGGGGGGATAGAGCTATGGGCCCCGAATACTTTGACTCCTGGGGCCAGGGAACCCTGGTCACCGTCTCCTCAG	QVQLQESGPGLVKPSGTLSLTCAVSAGSISSNNWWSWVRQPPGKGLEWIGEVYHNGNINYNPSLKSRVTLSVDKSKNQFSLKLSSVTAADTAVYYCAKGGDRAMGPEYFDSWGQGTLVTVSS		VL2-14	JL3	CAGTCTGCCCTGACTCAGCCTGCCTCCGTGTCTGGGTCTCCTGGACAGTCGATCACCATCTCCTGCACTGGAACCAGCAGTGACGTTGGTGCTAACAACTATGTCTCCTGGTACCAACAACACCCAGGCAAAGCCCCCAAACTCATGATTTATGATGTCAATGAGCGGCCCTCAGGGGTTTCTAATCGCTTCTCTGGCTCCAAGTCTGGCAACACGGCCTCCCTGACCATCTCTGGCCTCCAGACTGAGGACGAGGCTGATTATTACTGCAGCTCATTTGCAAGTAGCAGCACTCTTTTGTTCGGCGGAGGGACCAAGCTGACCGTCCTAG	QSALTQPASVSGSPGQSITISCTGTSSDVGANNYVSWYQQHPGKAPKLMIYDVNERPSGVSNRFSGSKSGNTASLTISGLQTEDEADYYCSSFASSSTLLFGGGTKLTVL		1.6785	2.1335	1.4285	1.625	1.376	1.595	1.682	1.455	1.794	1.873	52.2278	274.995
	C513	6.2m	VH3-23	JH6	GAGGTGCAGCTGTTGGAGTCTGGGGGAGGCTTGGTACAGCCTGGGGGGTCCCTGAGACTCTCCTGTGTAGCCTCTGGATTCAGCTTTAGCACCTATGCCATGAGTTGGGTCCGCCAGGCTCCAGGGCAGGGGCTTGAGTGGGTCTCAACTATTACTGGTACTAGTATTGGCACATACTACGCAGACTCCGTGAAGGGCCGGTTCACCATCTCCAGAGACAATTCCAAGAACACAGTTTTTCTGCAAATGAAAAGCCTGAGAGCCGAGGACGCGGCCGTGTATTACTGTGCGAACCACCCTCTGGCATCAGGCGACGAGTACTACTACTACTACATGGACGTCTGGGGCAAAGGGACCACGGTCACCGTCTCCTCA	EVQLLESGGGLVQPGGSLRLSCVASGFSFSTYAMSWVRQAPGQGLEWVSTITGTSIGTYYADSVKGRFTISRDNSKNTVFLQMKSLRAEDAAVYYCANHPLASGDEYYYYYMDVWGKGTTVTVSS		VK3-20	JK4	GAAATTGTGTTGACGCAGTCTCCAGACACCCTGTCTTTGTCTCCAGGGGAAAGAGCCACCCTCTCCTGCAGGGCCAGTCAGAGTGTTCACAGCAAGCAGTTAGCCTGGTATCAGCAGAAACCTGGCCAGGCTCCCAGGCTCCTCATCTATGGTGCGTCCAGCAGGGCCACTGGCATCCCAGACAGGTTCAGTGGCAGTGGATCTGGGACAGACTTCACTCTCACCATCAGCAGACTGGAGCCTGAAGATTTTGCAGTGTATTACTGTCAGCAATATGGTAGTATAAGGGCGCTCACTTTCGGCGGAGGGACCAAGGTGGAGATCAAAC	EIVLTQSPDTLSLSPGERATLSCRASQSVHSKQLAWYQQKPGQAPRLLIYGASSRATGIPDRFSGSGSGTDFTLTISRLEPEDFAVYYCQQYGSIRALTFGGGTKVEIK		1.31	0.9926	1.415	1.211	1.312	1.284	1.403	1.118	1.038	1.112	12.8626	88.4353
	C514	6.2m	VH3-66	JH4	GAGGTGCAGCTGGTGGAGTCTGGGGGAGGCTTGGTCCAGCCTGGGGGGTCCCTGAGACTCTCCTGTGCAGCCTCTGAATTCATCGTCACTAGGAATTACATGAGTTGGGTCCGCCAGGCTCCAGGGAAGGGGCTGGAGTGGGTCTCACTTATTTATCCCGGTGGCAGCACATTCTACGCAGACTCCGTGAAGGGCAGATTCACCATCTCCAGAGACAATTCCAAGAACACGCTCTTTCTTCACATGAACAGTCTGAGAGCCGAGGACACAGCTGTGTATTACTGTGCGAGAGATTTGGCAGGTCGTCTTGACTACTGGGGCCAGGGAACCCTGGTCACCGTCTCCTCAG	EVQLVESGGGLVQPGGSLRLSCAASEFIVTRNYMSWVRQAPGKGLEWVSLIYPGGSTFYADSVKGRFTISRDNSKNTLFLHMNSLRAEDTAVYYCARDLAGRLDYWGQGTLVTVSS		VK1-33	JK4	GACATCCAGATGACCCAGTCTCCATCCTCCCTGTCTGCATCTGTAGGAGACAGAGTCACCATCACTTGCCAGGCGAGTCAGGACATTAACAACTTTTTAAATTGGTATCAGCAGAAACCAGGGAAAGCCCCTAAGCTCCTGATCTACGATGCATCCAATTTGGAAACAGGGGTCCCATCAAGGTTCAGTGGAAGTGGATCTGGGACAGATTTTACTTTCACCATCAGCAGCCTGCAGCCTGAGGATATTGCAATATATTACTGTCAACAGTATGATAGTCTCTCTCGACTCACTTTCGGCGGAGGGACCAAGGTGGAGATCAAAC	DIQMTQSPSSLSASVGDRVTITCQASQDINNFLNWYQQKPGKAPKLLIYDASNLETGVPSRFSGSGSGTDFTFTISSLQPEDIAIYYCQQYDSLSRLTFGGGTKVEIK		0.82	0.9783	0.8688	0.9353	0.9793	1.068	0.9336	0.9761	1.017	1.213	22.2825	86.3195
	C515	1.3m	VH3-66	JH4	GAGGTGCAGCTGGTGGAGTCTGGGGGAGGCTTGGTCCAGCCTGGGGGGTCCCTGAGACTCTCCTGTGCAGCCTCTGGATTCATCGTCAGTAGCAACTACATGAGCTGGGTCCGCCAGGCTCCAGGGAAGGGGCTGGAGTGGGTCTCAATTCTTTATAGCGGTGGTAGCACATACTACGCAGACTCCGTGAAGGGCAGATTCACCATCTCCAGAGACAATTCCAAGAACACGCTGTATCTTCAAATGAACAGCCTGAGAGCCGAGGACACGGCTGTGTATTACTGTGCGAGAGATTTAGTTGTCTACGGAGCTGACTACTGGGGCCAGGGAACCCTGGTCACCGTCTCCTCAG	EVQLVESGGGLVQPGGSLRLSCAASGFIVSSNYMSWVRQAPGKGLEWVSILYSGGSTYYADSVKGRFTISRDNSKNTLYLQMNSLRAEDTAVYYCARDLVVYGADYWGQGTLVTVSS		VK1-9	JK4	GACATCCAGTTGACCCAGTCTCCATCCTTCCTGTCTGCATCTGTAGGAGACAGAGTCACCATCACTTGCCGGGCCAGTCAGGGCATTAGCAGTTATTTAGCCTGGTATCAGCAAAAACCAGGGAAAGCCCCTAAGCTCCTGATCTATGCTGCATCCACTTTGCAAAGTGGGGTCCCATCAAGGTTCAGCGGCAGTGGATCTGGGACAGAATTCACTCTCACAATCAGCAGCCTGCAGCCTGAAGATTTTGCAACTTATTACTGTCAACAGCTTAATAGTTACCCCCCTCCTTTCGGCGGAGGGACCAAGGTGGAGATCAAAC	DIQLTQSPSFLSASVGDRVTITCRASQGISSYLAWYQQKPGKAPKLLIYAASTLQSGVPSRFSGSGSGTEFTLTISSLQPEDFATYYCQQLNSYPPPFGGGTKVEIK		1.73	1.35	2.486	3.49	1.436	1.603	10.72	1.28	1.428	1.548	11.0366	51.0047
	C516	1.3m	VH1-69	JH3	CAGGTGCAGCTGGTGCAGTCTGGGGCTGAGGTGAAGAAGCCTGGGTCCTCGGTGAAGGTCTCCTGCAAGGCTTCTGGAGGCACCTTCAGCAGCTATGCTATCAGCTGGGTGCGACAGGCCCCTGGACAAGGGCTTGAGTGGATGGGAAGGATCATCCCTATGCTTGTTATAGCAACCTACGCACGGAAGTTCCAGGGCAGAGTCACGATTACCGCGGACAAATCCACGAGCACAGCCTACATGGAGCTGAGCAGCCTGAGATCTGAGGACACGGCCGTGTATTACTGTGCGAGAGGGGTGGTAGCTGCTACTCCGGGGAATTTTGATATCTGGGGCCAAGGGACAATGGTCACCGTCTCTTCAG	QVQLVQSGAEVKKPGSSVKVSCKASGGTFSSYAISWVRQAPGQGLEWMGRIIPMLVIATYARKFQGRVTITADKSTSTAYMELSSLRSEDTAVYYCARGVVAATPGNFDIWGQGTMVTVSS		VK3-15	JK4	GAAATAGTGATGACGCAGTCTCCAGCCACCCTGTCTGTGTCTCCAGGGGAAAGAGCCACCCTCTCCTGCAGGGCCAGTCAGAGTGTTAGCAGCAACTTAGCCTGGTACCAGCAGAAACCTGGCCAGGCTCCCAGGCTCCTCATCTATGGTGCATCCACCAGGGCCACTGGTATCCCAGCCAGGTTCAGTGGCAGTGGGTCTGGGACAGAGTTCACTCTCACCATCAGCAGCCTGCAGTCTGAAGATTTTGCAGTTTATTACTGTCAGCAGTATAATAACGGGCTCACTTTCGGCGGAGGGACCAAGGTGGAAATCAAAC	EIVMTQSPATLSVSPGERATLSCRASQSVSSNLAWYQQKPGQAPRLLIYGASTRATGIPARFSGSGSGTEFTLTISSLQSEDFAVYYCQQYNNGLTFGGGTKVEIK		5.718	n.d.	n.d.	n.d.	n.d.	n.d.	n.d.	n.d.	n.d.	n.d.	8.85267	35.2393
	C517	1.3m	VH3-66	JH4	GAGGTGCAGCTGGTGGAGTCTGGGGGAGGCTTGGTCCAGCCTGGGGGATCCCTGAGACTCTCCTGTGCAGCCTCTGAATTCATCGTCAGTAGGAACTACATGAGCTGGGTCCGCCAGGCTCCAGGGAAGGGGCTGGAGTGGGTCTCACTTATTTATAGCGGTGGTAGCACATACTACGCAGACTCCGTGAAGGGCAGATTCACCATCTCCAGAGACAACTCCAAGAACACACTGTATCTTCAAATGAACAGCCTGAGAGCCGAGGACACGGCTATGTATTACTGTGCGAGAGATATAGCAGGTCGTCTTGACTACTGGGGCCAGGGAACCCTGGTCACCGTCTCCTCAG	EVQLVESGGGLVQPGGSLRLSCAASEFIVSRNYMSWVRQAPGKGLEWVSLIYSGGSTYYADSVKGRFTISRDNSKNTLYLQMNSLRAEDTAMYYCARDIAGRLDYWGQGTLVTVSS		VK1-33	JK4	GACATCCAGATGACCCAGTCTCCATCCTCCCTGTCTGCATCTGTAGGAGACAGAGTCACCATCACTTGCCAGGCGAGTCAGGACATTAGCAAGTATTTAAATTGGTATCAGCAGAAACCAGGGAAAGCCCCTAAGCTCCTGATCTACGATGCATCCAATTTGGAAACAGGGGTCCCATCAAGGTTCAGTGGAAGTGGATCTGGGACAGATTTTACTTTCACCATCAGCAGCCTGCAGCCTGAAGATTTCGCAACATATTACTGTCAACACTATGATAGTCTCTCTCGACTCACTTTCGGCGGAGGGACCAAGGTGGAGATCAAAC	DIQMTQSPSSLSASVGDRVTITCQASQDISKYLNWYQQKPGKAPKLLIYDASNLETGVPSRFSGSGSGTDFTFTISSLQPEDFATYYCQHYDSLSRLTFGGGTKVEIK		0.87	1.025	1.185	1.2	1.26	1.385	1.248	1.239	1.292	1.441	11.3084	49.5146
	C597	1.3m	VH1-58	JH3	CAGGTGCAGCTGGTGCAGTCTGGGCCTGAGGTGAAGAAGCCTGGGACCTCAGTGAAGGTCTCCTGCAAGGCTTCTGGATTCACCTTTACTAACTCTGCTGTGCAGTGGGTGCGACAGTCTCGTAGACAACGCCTTGAGTGGATAGGATGGATCGTCGTTGGCAGTGGTAACACAAACTACGCACAGAAGTTCCAGGAAAGAGTCACCATTACCAGGGACATGTCCACAAGCACAGCCTACATGGAGCTGAGCAGCCTGAGATCCGAGGACACGGCCGTGTATTACTGTGCGGCAGTGGATTGTAATAGTACCAGCTGCTATGATGCTTTTGATATCTGGGGCCAAGGGACAATGGTCACCGTCTCTTCAG	QVQLVQSGPEVKKPGTSVKVSCKASGFTFTNSAVQWVRQSRRQRLEWIGWIVVGSGNTNYAQKFQERVTITRDMSTSTAYMELSSLRSEDTAVYYCAAVDCNSTSCYDAFDIWGQGTMVTVSS		VK3-20	JK1	GAAATTGTGTTGACGCAGTCTCCAGGCACCCTGTCTTTGTCTCCAGGGGAAAGAGCCACCCTCTCCTGCAGGGCCAGTCAGAGTTTTAGGAGCAGCTACTTAGCCTGGTACCAGCAGAAACCTGGCCAGGCTCCCAGGCTCCTCATCTATGGTGCATCCAGCAGGGCCACTGGCATCCCAGACAGGTTCAGTGGCAGTGGGTCTGGGTCAGACTTCACTCTCACCATCAGCAGACTGGAGCCTGAAGATTTTGCAGTGTATTACTGTCAGCAGTATGATATCTCACCTTGGACGTTCGGCCAGGGGACCAAGGTGGAAATCAAAC	EIVLTQSPGTLSLSPGERATLSCRASQSFRSSYLAWYQQKPGQAPRLLIYGASSRATGIPDRFSGSGSGSDFTLTISRLEPEDFAVYYCQQYDISPWTFGQGTKVEIK		3.766	2.45	4.416	4.196	2.08	1.953	2.573	2.007	2.171	2.189	5.08553	20.0453
	C598	6.2m	VH1-58	JH3	CAGGTGCAGCTGGTGCAGTCTGGGCCTGAGGTGAAGAAGCCTGGGACCTCAGTGAAGGTCTCCTGTAAGGCTTCTGGATTCACCTTTAGTAGCTCTGCTGTGCAGTGGGTGCGACAGGCTCGTGGACAACGCCTTGAGTGGATAGGATGGATCGTCGTTGGCAGTGGAAACACAAACTACGCACAGAAGTTCCAGGAAAGAGTCACCATTACCAGGGACATGTCCACAAGCACAGCCTACATGGAGCTGAGCAGTCTGAGATCCGAGGACACGGCCGTGTTTTACTGTGCGGCCCCCTATTGTAATGTTACCACCTGCTTTGATGGTTTTAATATCTGGGGCCGAGGGACAATGGTCACCGTCTCTTCAG	QVQLVQSGPEVKKPGTSVKVSCKASGFTFSSSAVQWVRQARGQRLEWIGWIVVGSGNTNYAQKFQERVTITRDMSTSTAYMELSSLRSEDTAVFYCAAPYCNVTTCFDGFNIWGRGTMVTVSS		VK3-20	JK1	GAAATTGTGTTGACGCAGTCTCCAGGCACCCTGTCTTTGTCTCCAGGGGAAAGAGCCACCCTCTCCTGCAGGGCCAGTCAGAGTGTTAGAAGCAGCTACTTCGCCTGGTACCAGCAGAAACCTGGCCAGGCTCCCAGGCTCCTCATCTATGCTGCATCCAGCAGGGCCACTGGCATCCCTGACAGGTTCAGTGGCAGTGGGTCTGGGACAGACTTCACTCTCACCATCAGCAGACTGGAGCCTGAAGATTTTGCACTGTATTACTGTCAGCAATATGGTAGTTCACCGTGGACGTTCGGCCAAGGGACCAAGGTGGAAATCAAAC	EIVLTQSPGTLSLSPGERATLSCRASQSVRSSYFAWYQQKPGQAPRLLIYAASSRATGIPDRFSGSGSGTDFTLTISRLEPEDFALYYCQQYGSSPWTFGQGTKVEIK		3.782	2.573	3.158	3.019	2.056	2.084	2.445	2.161	2.266	2.211	7.11819	31.2855
COV96	C523	6.2m	VH4-59	JH4	CAGGTGCAGCTGCAGGAGTCGGGCCCAGGACTGGTGAAGCCTTCGGAGACCCTGTCCCTCACCTGCACTGTCTCTGGTGCCTCCATCAGTAGTCACTACTGGAGCTGGATCCGGCAGCCCCCAGGGAAGGGACTGGAGTGGATCGGGTATATCCATTACATTGGAAGCACCAACTACAACCCCTCCCTCAAGAGTCGAGTCACCATATTATTAGACACGTCCAAGAACCAGTTCTCCCTGAGGCTGCGCTCTGTGACCGCTGCGGACACGGCCGTGTATTACTGTGCGAGAGGGTGGCCATATTGTGGTGTTGACTGCTATTCGGGGTTTGACTACTGGGGCCAGGGAACCCTGGTCACCGTCTCCTCAG	QVQLQESGPGLVKPSETLSLTCTVSGASISSHYWSWIRQPPGKGLEWIGYIHYIGSTNYNPSLKSRVTILLDTSKNQFSLRLRSVTAADTAVYYCARGWPYCGVDCYSGFDYWGQGTLVTVSS		VL1-44	JL3	CAGTCTGTGCTGACTCAGCCACCCTCAGCGTCTGGGACCCCCGGGCAGAGGGTCACCATCTCTTGTTCTGGAAGCAGCTCCAACATCGGAAGTAATACTGTAAACTGGTACCAGCAGCTCCCAGGAACGGCCCCCAAACTCCTCATCTATAGTAATAATCAGCGGCCCTCAGGGGTCCCTGACCGATTCTCTGGCTCCAAGTCTGGCACCTCAGCCTCCCTGGCCATCAGTGGGCTCCAGTCTGAGGATGAGGCTGATTATTACTGTGCAGCATGGGATGACAGTCTGAATGGTCTTTGGGTGTTCGGCGGAGGGACCAAGCTGACCGTCCTAG	QSVLTQPPSASGTPGQRVTISCSGSSSNIGSNTVNWYQQLPGTAPKLLIYSNNQRPSGVPDRFSGSKSGTSASLAISGLQSEDEADYYCAAWDDSLNGLWVFGGGTKLTVL		9.076	n.d.	n.d.	n.d.	n.d.	n.d.	n.d.	n.d.	n.d.	n.d.	973.582	>10000
	C524	6.2m	VH3-53	JH4	GAGGTGCAGCTGGTGGAGTCTGGAGGAGACTTGATCCAGCCTGGGGGGTCCCTGAGACTCTCCTGTGCAGCCTCTGGGTTCAGCGTCAGTAACAGTTACATGAGCTGGGTCCGCCAGGCTCCAGGGAAGGGGCTGGAGTGGGTCTCAATTATTTATAGCGGTGGTAGCACATACTACGCAGACTCCGTGAAGGGCCGATTCACCATCTCCAGAGACAATTCCAAGAACACGCTGTATCTTCAAATGAACAGCCTGAGAGCCGAGGACACGGCCGTGTATTTCTGTGCGAAAACTCCCCGGGGGGACTATGATAGTAGTGGTACCTCAGCCTACTGGGGCCAGGGAACCCTGGTCACCGTCTCCTCAG	EVQLVESGGDLIQPGGSLRLSCAASGFSVSNSYMSWVRQAPGKGLEWVSIIYSGGSTYYADSVKGRFTISRDNSKNTLYLQMNSLRAEDTAVYFCAKTPRGDYDSSGTSAYWGQGTLVTVSS		VL4-69	JL3	CAGCTTGTGCTGACTCAATCGCCCTCTGCCTCTGCCTCCCTGGGAGCCTCGGTCAACCTCACCTGCACTCTGAGCAGTGGGCACAGCAGCTACGCCATCGCATGGCATCAGCAGCAGCCAGAGAAGGGCCCTCGATTCTTGATGAAGCTTAGCAGTGATGGCAGCCACAACAAGGGGGACGGGATCCCTGATCGCTTCTCAGGCTCCAGCTCTGGGGCTGAGCGCTTCCTCACCATTTCCAGCCTCCAGTCTGAGGATGAGGCTGACTATTACTGTCAGACCTGGGGCATTGGCTCTGATTGGGTGTTCGGCGGAGGGACCAAGCTGACCGTCCTA	QLVLTQSPSASASLGASVNLTCTLSSGHSSYAIAWHQQQPEKGPRFLMKLSSDGSHNKGDGIPDRFSGSSSGAERFLTISSLQSEDEADYYCQTWGIGSDWVFGGGTKLTVL		4.996	n.d.	n.d.	n.d.	n.d.	n.d.	n.d.	n.d.	n.d.	n.d.	8.01425	38.5546
	C525	6.2m	VH3-9	JH4	GAGGTGCAGCTGGTGGAGTCTGGGGGACGCTTGGTACAGCCTGGCAGGTCCCTGAGACTCTCCTGTGCAGCCTCTGGATTCACCTTTGATGATTATGCCATACACTGGGTCCGGCAAGCTCCAGGGAAGGGCCTGGAGTGGGTCTCAGGTATTAGTTGGAATAGTGGTAGTATAGGCTATGCGGACTCTGTGAGGGGCCGATTCACCATCTCCAGAGACAACGCCAAGAACTCCCTGTATCTGCAAATGAACAGTCTGAGAGCTGAGGACACGGCCTTGTATTACTGTGCAAAAGGGTTAGATAGCAGCTCGTCTGCCAGCCCGGACTACTGGGGCCAGGGAACCCTGGTCACCGTCTCCTCAG	EVQLVESGGRLVQPGRSLRLSCAASGFTFDDYAIHWVRQAPGKGLEWVSGISWNSGSIGYADSVRGRFTISRDNAKNSLYLQMNSLRAEDTALYYCAKGLDSSSSASPDYWGQGTLVTVSS		VK1D-1	JK4	GACATCCAGATGACCCAGTCTCCATCTTCTGTGTCTGCATCTGTAGGAGACAGAGTCACCATCACTTGTCGGGCGAGTCAGGATATTAGCAGCTGGTTAGCCTGGTATCAGCAGAAACCAGGGAAAGCCCCTAAGCTCCTGATCTATCTTGCATCCAGTTTGCAAAGTGGGGTCCCATCAAGGTTCAGCGGCAGTGGATCTGGGACAGATTTCATTCTCACTATCAGCAGCCTGCAGCCTGAAGATTTTGGAACTTACTATTGTCAACAGGGTAACAGTTTCCCCCTCACTTTCGGCGGAGGGACCAAGGTGGAAATCAAAC	DIQMTQSPSSVSASVGDRVTITCRASQDISSWLAWYQQKPGKAPKLLIYLASSLQSGVPSRFSGSGSGTDFILTISSLQPEDFGTYYCQQGNSFPLTFGGGTKVEIK		10.56	n.d.	n.d.	n.d.	n.d.	n.d.	n.d.	n.d.	n.d.	n.d.	317.73	3940.15
	C526	6.2m	VH1-46	JH4	CAGGTGCAGCTGGTGCAGTCTGGGGCTGAGGTGAAGAAGCCTGGGGCCTCAGTGAAGGTTTCCTGCAAGGCATCTGGACACACCTTCACCACCTACTATCTGCACTGGGTGCGACAGGCCCCTGGACAAGGGCTTGAGTGGATGGGAAGAATCGACCCTAGTGGTGGTAGCACAACCTACGCACAGAAGTTCCAGGGCAGAGTCACCATGACCAGGGACACGTCCACGAGCACAGTCTACATGGAGCTGAGCAGCCTGAGATCTGAGGACACGGCCCTGTATTACTGTGCGAGGGGTGGATATTGTGGTAGCACCAGCTGCTCGCCAGATGACTACTTTGACTACTGGGGCCAGGGAACCCTGGTCACCGTCTCCTCAG	QVQLVQSGAEVKKPGASVKVSCKASGHTFTTYYLHWVRQAPGQGLEWMGRIDPSGGSTTYAQKFQGRVTMTRDTSTSTVYMELSSLRSEDTALYYCARGGYCGSTSCSPDDYFDYWGQGTLVTVSS		VL3-21	JL1	TCCTATGAGCTGACTCAGCCACCCTCAGTGTCAGTGGCCCCAGGAAAGACGGCCAGGATTACCTGTGGGGGAAACAACATTGGAAGTAAAAGTGTGCACTGGTACCAGCAGAAGCCAGGCCAGGCCCCTGTGCTGGTCATCTATTATGATAGCGACCGGCCCTCAGGGATCCCTGAGCGATTCTCTGGCTCCAACTCTGGGAACACGGCCACCCTGACCATCAGCAGGGTCGAAGCCGGGGATGAGGCCGACTATTACTGTCAGGTGTGGGATAGTAGTAGTGATCATTACTATGTCTTCGGAACTGGGACCAAGGTCACCGTCCTAG	SYELTQPPSVSVAPGKTARITCGGNNIGSKSVHWYQQKPGQAPVLVIYYDSDRPSGIPERFSGSNSGNTATLTISRVEAGDEADYYCQVWDSSSDHYYVFGTGTKVTVL		18.25	n.d.	n.d.	n.d.	n.d.	n.d.	n.d.	n.d.	n.d.	n.d.	412.247	>10000
	C527	6.2m	VH3-33	JH6	CAGGTGCAGCTGGTGGAGTCTGGGGGAGGCGTGGTCCAGCCTGGGAGGTCCCTGAGACTCTCCTGTGCAGCGTCTGGATTCACCTTCAGCAGTTATGGCATGCACTGGGTCCGCCAGGCTCCAGGCAAGGGGCTGGAGTGGGTGGCACTTATAGGGTATGATGGAACTGACAAATACTATGCAGAAAACGTGAAGGGCCGATTCACCATCTCCAGAGACAATTCGAAGAACACGCTGTTTCTGCAAATGAACAGCCTGAGAGGCGGGGACACGGCTGTGTACCTCTGTGCGAGAGATGGTATTCCATTCAGATACGGTATGGACGTCTGGGGCCAAGGGACCACGGTCACCGTCTCCTCA	QVQLVESGGGVVQPGRSLRLSCAASGFTFSSYGMHWVRQAPGKGLEWVALIGYDGTDKYYAENVKGRFTISRDNSKNTLFLQMNSLRGGDTAVYLCARDGIPFRYGMDVWGQGTTVTVSS		VK1-5	JK1	GACATCCAGATGACCCAGTCTCCTTCCACCCTGTCTGCATCTGTCGGAGACAGAGTTACCATCACTTGCCGGGCCAGTCAGAGTATTGATATCTGGTTGGCCTGGTATCAGCAGAAACCAGGGAAAGCCCCTAAGTTCCTGATCCATAAGGCGTCCACTTTAGAAAGTGGGGTCCCATCAAGGTTCAGCGGCAGTGGATCTGGGACAGAATTCACTCTCACCATCAGCAGCCTGCAGCCTGATGATTTTGCAACTTATTACTGCCAACACTATCATAGTTATTCGGGGACGTTCGGCCAAGGGACCAAGGTGGAAATCAAAC	DIQMTQSPSTLSASVGDRVTITCRASQSIDIWLAWYQQKPGKAPKFLIHKASTLESGVPSRFSGSGSGTEFTLTISSLQPDDFATYYCQHYHSYSGTFGQGTKVEIK		13.44	n.d.	n.d.	n.d.	n.d.	n.d.	n.d.	n.d.	n.d.	n.d.	917.08	>10000
	C528	6.2m	VH3-13	JH2	GAGGTGCAGCTGGTGGAGTCTGGGGGAGGCTTGGTACAGCCTGGGGGGTCCCTGAGACTCTCCTGTGCAGCCTCTGGATTCACGTTCAGGAACTACGACATGCACTGGGTCCGCCAAGTTGCAGGAAAAGGTCTAGAGTGGGTCTCAGCTATTGGCACTTCTGGTGACACATACTATCCAGACTCCGTGAAGGGCCGATTCACCATCTCCAGAGAAAATGCCAAGAACTCCGTGTATCTTCAAATGAACAACTTGAGAGCCGGGGACACGGCTGTGTATTTCTGTGTAAGAGATCGGGAAATCAGTGGCTGGACCGGCTGGTACTTCGATCTCTGGGGCCGTGGCACCCTGGTCACCGTCTCCTCAG	EVQLVESGGGLVQPGGSLRLSCAASGFTFRNYDMHWVRQVAGKGLEWVSAIGTSGDTYYPDSVKGRFTISRENAKNSVYLQMNNLRAGDTAVYFCVRDREISGWTGWYFDLWGRGTLVTVSS		VK1-39	JK5	GACATCCAGATGACCCAGTCTCCATCCTCCCTGTCTGCATCTGTTGGAGACAGAGTCACCATCACTTGCCGGGCAAGTCAGACCATTCATAATTATTTAAATTGGTATCAACAAATACCAGGGAAAGCCCCTAGGCTCCTGATCTATGCTACAAACACTTTGCAAAGTGGGGTCCCATCAAGGTTCAGTGGCAGTGGATCTGGGACAGATTTCACTCTCACCATCACCGGTCTGCAACCTGAAGATTTTGCAACTTATTACTGTCAACAGAGTTACAGTACTCCCCCGATCACGTTCGGCCAGGGGACACGACTGGAGATTAAAC	DIQMTQSPSSLSASVGDRVTITCRASQTIHNYLNWYQQIPGKAPRLLIYATNTLQSGVPSRFSGSGSGTDFTLTITGLQPEDFATYYCQQSYSTPPITFGQGTRLEIK		5.664	n.d.	n.d.	n.d.	n.d.	n.d.	n.d.	n.d.	n.d.	n.d.	4005.3	>10000
	C529	6.2m	VH3-23	JH3	GAGGTGCAGCTGTTGGAGTCTGGGGGAGGCTTGGTACAGCCTGGGGGGTCCCTGAGACTCTCCTGTGCAGCCTCTGGATTCACCTTTAACAACTATGCCATGAACTGGGTCCGCCAGGCTCCAGGGAGGGGTCTGGAGTGGGTCTCAGGTATTAGTGGAAGTGGTGCTAACACATACTACGCGGACTCCGTGAAGGGCCGGTTCACCATCTCCAGAGACAATCCCAAGAACACGCTGTCTCTGCAAATGAACAGTCTGAGAGCCGAGGACACGGCCCTATATTACTGTGCGAAAGTCCTTTCCCCTACCTATTACGATTCTTGGAGTGGTCCTGATGCTTTTGATTTCTGGGGCCAAGGGACAATGGTCACCGTCTCTTCAG	EVQLLESGGGLVQPGGSLRLSCAASGFTFNNYAMNWVRQAPGRGLEWVSGISGSGANTYYADSVKGRFTISRDNPKNTLSLQMNSLRAEDTALYYCAKVLSPTYYDSWSGPDAFDFWGQGTMVTVSS		VK1-5	JK1	GACATCCAGATGACCCAGTCTCCTTCCACCCTGTCTGCATCTGTAGGAGACAGAGTCACCATCACTTGCCGGGCCAGCCAGACTATTAGTCCCTGGTTGGCCTGGTATCAGCAGAAACCAGGGAAAGCCCCTAACCTCCTGATCTATAAGGCGTCTAGTTTAGAAAGTGGGGTCCCATCAAGGTTCAGCGGCAGTGGATCTGGGACAGAATTCACTCTCACCATCAGCAGCCTGCAGCCTGATGATTTTGCAACTTATTACTGCCAACAGTATAATAGTTATTCTTCGTGGACGTTCGGCCAAGGGACCAAGGTGGAGATCAAAC	DIQMTQSPSTLSASVGDRVTITCRASQTISPWLAWYQQKPGKAPNLLIYKASSLESGVPSRFSGSGSGTEFTLTISSLQPDDFATYYCQQYNSYSSWTFGQGTKVEIK		7.995	n.d.	n.d.	n.d.	n.d.	n.d.	n.d.	n.d.	n.d.	n.d.	577.95	5512.55
	C530	6.2m	VH3-33	JH4	CAGGTGCAGCTGGTGGAGTCTGGGGGAGGCGTGGCCCAGCCTGGGAGGTCCCTGAGACTCTCCTGTGCAGCGTCTGGATTCACCTTCAGTAGATATGGCATGCACTGGGTCCGCCAGGCTCCTGGCAAGGGGCTGGAGTGGGTGGCAGTTATCTGGCATGATGGAAGTGATAAATACTGTGCAGACTTTGTGAAGGGCCGATTCACCATCTCCAGAGACAATTCCAAGAACACGTTGTATATGCAAATGGACAGCCTGAGAGCCGAGGACACGGCTGTGTATTACTGTGCGAGAGGCGGTAGGCCGGACCACGAAACGGGCATAGCAGTGCTTGGGGAATATTACTTTGACTCCTGGGGCCAGGGAACCCTGGTCACCGTCTCCTCAG	QVQLVESGGGVAQPGRSLRLSCAASGFTFSRYGMHWVRQAPGKGLEWVAVIWHDGSDKYCADFVKGRFTISRDNSKNTLYMQMDSLRAEDTAVYYCARGGRPDHETGIAVLGEYYFDSWGQGTLVTVSS		VL3-25	JL2	TCCTATGAGCTGACTCAGCCACCCTCGGTGTCAGTGTCCCCAGGACAGACGGCCAGGATCACCTGCTCTGGAGATGCATTTCCACTGCAATATGGTTATTGGTACCAGCAGAAGCCAGGCCAGGCCCCTGTATTGGTGATATATAAAGACAAAGAGAGGCCCTCAGGGATTTCTGAGCGATTCTCTGGCTCCAGCTCAGGGACAACAGTCACGTTGACCATCAGTGGCGTCCAGGCAGAAGACGAGGCTGACTATTACTGTCAATCAGCAGACACCAATGGGGTGGTATTCGGCGGAGGGACCAGCCTGACCGTCCTAG	SYELTQPPSVSVSPGQTARITCSGDAFPLQYGYWYQQKPGQAPVLVIYKDKERPSGISERFSGSSSGTTVTLTISGVQAEDEADYYCQSADTNGVVFGGGTSLTVL		10.46	n.d.	n.d.	n.d.	n.d.	n.d.	n.d.	n.d.	n.d.	n.d.	1068.11	>10000
	C531	6.2m	VH3-9	JH4	GAAGTGCAGCTGGTGGAGTCTGGGGGAGGCTTGGTACAGCCTGGCAGGTCCCTGAGACTCTCCTGTGTAGCCACTGGATTCACCTTTGATGATTTTGCCATGCACTGGGTCCGGCAGGCTCCAGGGAAGGGCCTGGAGTGGGTCTCAGGTATTAGTTGGAATGGTGGTATCATAGGCTATGTGGACTCTGTGAAGGGCCGATTCACCATTTCCAGAGACAACGCCAAGAACTCCCTATATCTGCAAATGAACAGTCTGAGACCTGAGGACACGGCCTTGTATTACTGTGTAAAAGGTTATCGCTACTATTACGATATTTTGACTGGTTATTACAACGACGCGGGGGCCTTTGACTACTGGGGCCAGGGAACCCTGGTCACCGTCTCCTCAG	EVQLVESGGGLVQPGRSLRLSCVATGFTFDDFAMHWVRQAPGKGLEWVSGISWNGGIIGYVDSVKGRFTISRDNAKNSLYLQMNSLRPEDTALYYCVKGYRYYYDILTGYYNDAGAFDYWGQGTLVTVSS		VK1-9	JK3	GACATCCAGTCGACCCAGTCTCCATCCTTCCTGTCTGCATCTGTAGGAGACAGAGTCGCCATCACTTGCCGGGCCAGTCAGGGCATTAGCAGTTATTTAGCCTGGTATCAGCAAAAACCAGGGAAAGCCCCTAAGCTCCTGATCTATCCTGCATCCACTTTGCAAAGTGGGGTCCCATCAGGGTTCAGCGGCAGTGGATCTGGGACAGAATTCACTCTCACAATCAGCAGCCTGCAGCCTGAAGATTTTGCAACTTATTACTGTCAACAGCTTAATGATTACCCCTTCACTTTCGGCCCTGGGACCAAAGTGGATATCAAAC	DIQSTQSPSFLSASVGDRVAITCRASQGISSYLAWYQQKPGKAPKLLIYPASTLQSGVPSGFSGSGSGTEFTLTISSLQPEDFATYYCQQLNDYPFTFGPGTKVDIK		6.843	n.d.	n.d.	n.d.	n.d.	n.d.	n.d.	n.d.	n.d.	n.d.	55.1755	719.619
	C532	6.2m	VH5-51	JH5	GAGGTGCAGCTGGTGCAGTCTGGAGCAGAGGTGAAAAAGCCCGGGGAGTCTCTGAAGATCTCCTGTAAGGGTTCTGGATACAGATTTACCAACTACTGGATCGGCTGGGTGCGCCAGATGCCCGGGAAAGGCCTGGAGTGGATAGGGAACATCTTTCCCGGTGACTCTGATTCCAGATACAGCCCGTCCTTCCAAGGCCAGGTCACCATCTCAGTCGACATGTCCATCACCACCGCCTACCTGCACTGGAGCAGCCTGAAGGCCTCGGACACCGCCATCTATTACTGTGCGAGACTCAGTGAGCGCTGGTACAGTCCGTTCGACTCCTGGGGCCAGGGAACCCTGGTCACCGTCTCCTCAG	EVQLVQSGAEVKKPGESLKISCKGSGYRFTNYWIGWVRQMPGKGLEWIGNIFPGDSDSRYSPSFQGQVTISVDMSITTAYLHWSSLKASDTAIYYCARLSERWYSPFDSWGQGTLVTVSS		VK3-15	JK3	GAAATAGTGATGACGCAGTCTCCAGCCACCCTGTCTGTGTCTCCAGGGGAAAGAGCCACCCTCTCCTGCAGGGCCAGTCAGAGTGTTAGCAGCAACTTAGCCTGGTACCAGCAGAAGCCTGGCCAGGCTCCCAGGCTCCTCATCTATGGTGCATCCACCAGGGCCACTGGTTTCCCAGCCAGGTTCAGTGGCAGTGGGTCTGGGACAGAGTTCACTCTCACCATCAGCAGCCTGCAGTCTGAAGATTTTGCAGTTTATTTCTGTCAGCAGTATAATAACTGGCCTCCGGGGGGATTCACTTTCGGCCCTGGGACCAAAGTGGATATCAAAC	EIVMTQSPATLSVSPGERATLSCRASQSVSSNLAWYQQKPGQAPRLLIYGASTRATGFPARFSGSGSGTEFTLTISSLQSEDFAVYFCQQYNNWPPGGFTFGPGTKVDIK		1	1.145	1.356	2.798	4.438	3.981	18.92	3.003	4.355	6.282	116.147	1779.53
	C533	6.2m	VH3-15	JH3	GAGGTGCAGCTGGTGGAGTCTGGGGGAAGCTTGGTAAAGCCTGGGGGGTCCCTAAGACTCTCCTGTGTAGCCTCTGGACTCACTTTCAATCACGCCTGGATGAGCTGGGTCCGCCAGGCTCCAGGGAAGGGGCTGGAGTGGGTTGGCCGTATTAAAAGTAAAATTGATGGTGGGACAACAGACTACGCTGCACCCGTGAAAGGCAGATTCACCATCTCAAGAGATGATTCAAAAAGCACGCAATATCTGCAAATGAACAGCCTGAAAACCGAGGACACAGCCGTATATTACTGTACCACAGATTGTTTTTGGCGCCTCGGGGGCACCACCTGCTACGAGCACGATGCTTTTGATGTCTGGGGCCAAGGGACAATGGTCACCGTCTCTTCAG	EVQLVESGGSLVKPGGSLRLSCVASGLTFNHAWMSWVRQAPGKGLEWVGRIKSKIDGGTTDYAAPVKGRFTISRDDSKSTQYLQMNSLKTEDTAVYYCTTDCFWRLGGTTCYEHDAFDVWGQGTMVTVSS		VK1-39	JK4	GACATCCAGATGACCCAGTCTCCATCCTCCCTGTCTGCATCTGTAGGAGACAGAGTCACCATCACTTGCCGGGCAAGTCAGGCCATTGCCACCTTTTTAAATTGGTATCAGCAGAAACCAGGGAAAGCCCCTAAGCTCCTGATCTATGCTGCGTCCAGTTTACAAAGTGGGGTCCCATCAAGGTTCAGTGGCAGTGGATCAGGGACAGATTTCACTCTCACCATCAGCAATCTGCAACCTGAAGATTTTGCAACTTACTACTGTCAACAGAGTTACAATTCCCTTCACTTCGGCGGAGGGACCAAGGTGGAGATCAAAC	DIQMTQSPSSLSASVGDRVTITCRASQAIATFLNWYQQKPGKAPKLLIYAASSLQSGVPSRFSGSGSGTDFTLTISNLQPEDFATYYCQQSYNSLHFGGGTKVEIK		1.61	n.d.	n.d.	n.d.	n.d.	n.d.	n.d.	n.d.	n.d.	n.d.	14.151	98.8723
	C534	6.2m	VH1-69	JH6	CAGGTGCAGCTGGTGCAGTCTGGGGCTGAGGTGAAGAAGCCTGGGTCGTCGGTGAGGGTTTCCTGCAAGGCTTCTGGAGGCACCTTCAGCAGGAATGTTATCAGTTGGGTGCGACAGGCCCCTGGACAAGGGCTTGAGTGGATGGGAGGGATCATCCCTATGTTTGCTACAGCAAACTATGCACAGAAATTCCAGGGCAGAGTCACGATTACCGCGGACGAATCCTCGAGCACAGCCTACATGGAGCTGAGCAGCCTGAGATCTGAGGACACGGCCGTGTATTACTGTGCGAGAGAAGATTTCATACTAGTATCAGCTCCTATACGAGAAAATTCCTACTACTACTACGGTATGGACGTCTGGGGCCAAGGGACCACGGTCACCGTCTCCTCA	QVQLVQSGAEVKKPGSSVRVSCKASGGTFSRNVISWVRQAPGQGLEWMGGIIPMFATANYAQKFQGRVTITADESSSTAYMELSSLRSEDTAVYYCAREDFILVSAPIRENSYYYYGMDVWGQGTTVTVSS		VK3-20	JK1	GAAATTGTGTTGACGCAGTCTCCAGGCACCCTGTCTTTGTCTCCAGGGGAAAGAGCCACCCTCTCCTGCAGGGCCAGTCAGAGTGTTAGCAGCAACTACTTAGCCTGGTACCAGCAGAAGCCTGGCCAGGCTCCCAGGCTCCTCATCTATGATGCATCCAGCAGGGCCACTGGCATCCCAGACAGGTTCAGTGGCAGCGGGTCTGGGACAGACTTCACTCTCACCATCAGCAGACTGGAGCCTGAAGATTTTGCAGTGTATTACTGTCAGCAGTATGGTGGCTCACCTCGCACGTTCGGCCAAGGGACCAAGGTGGAGATCAAAC	EIVLTQSPGTLSLSPGERATLSCRASQSVSSNYLAWYQQKPGQAPRLLIYDASSRATGIPDRFSGSGSGTDFTLTISRLEPEDFAVYYCQQYGGSPRTFGQGTKVEIK		4.849	n.d.	n.d.	n.d.	n.d.	n.d.	n.d.	n.d.	n.d.	n.d.	>10000	>10000
	C535	6.2m	VH3-9	JH4	GAAGTGCAGCTGGTGGAGTCTGGGGGAGCCTTGGTACAGCCTGGCAGGTCCCTGAGACTCTCCTGTGCAGCCTCCGGATTCACCTTTGATGATTATGCCATGCACTGGGTCCGGCAAGCTCCAGGGAAGGGCCTGGAGTGGGTCTCAAGTATTAGTTGGAATGGTGTTAGTATAGGCTATGCGGACTCTGTGAGGGGCCGATTCACCATCTCCAGAGACAACGCCAAGAACTCCCTGTATCTGCAAATGAACAGTCTGAAAATTGGGGACACGGCCTTCTATTACTGTGCAAGGGGCTTAGATGGTAGCTCGTCTGCCAGCCCGGACTCCTGGGGCCAGGGAACCCTGGTCACCGTCTCCTCAG	EVQLVESGGALVQPGRSLRLSCAASGFTFDDYAMHWVRQAPGKGLEWVSSISWNGVSIGYADSVRGRFTISRDNAKNSLYLQMNSLKIGDTAFYYCARGLDGSSSASPDSWGQGTLVTVSS		VK1D-1	JK4	GACATCCAGATGACCCAGTCTCCATCTTCTGTGTCTGCATCTGTAGGAGACAGAGTCACCATCACTTGTCGGGCGAGTCAGGGTATTGGCAGCTGGTTAGCCTGGTATCAGCAGAAGCCAGGGAAAGCCCCTAAACTCCTGATCTATCTTGCATCCAGTTTGCAAAGTGGGGTCCCATCAAGGTTCAGCGGCAGTGGATCTGGGACATATTTCACGCTCACTATTAGCGGCCTGCAGCCCGAAGATTTTGCAACTTACTATTGTCAACAGGGTAACAGTTTCCCCCTCACTTTCGGCGGAGGGACCAAGGTGGAAATCAAAC	DIQMTQSPSSVSASVGDRVTITCRASQGIGSWLAWYQQKPGKAPKLLIYLASSLQSGVPSRFSGSGSGTYFTLTISGLQPEDFATYYCQQGNSFPLTFGGGTKVEIK		2.46	n.d.	n.d.	n.d.	n.d.	n.d.	n.d.	n.d.	n.d.	n.d.	372.464	>10000
	C536	6.2m	VH3-49	JH3	CAGGTGCAGCTGGTGGAGTCTGGGGGAGGCTTGGTAAAGCCAGGGCGGTCCCTGAGACTCTCCTGTACAGTTTCTGGATTCACCTTTGGTGCTTATGCTATGAGCTGGTTCCGCCAGGCTCCAGGGAAGGGGCTGGAGTGGGTAGGTTTCATTAGAAGCAAAACTTATGGTGGGACAACAGAGTACGCCGCGTCTTTGAAAGGCAGATTCACCATCTCGAGAGATGATTCCAAAAGCATCGCCTTTCTGCAAATGAACAGCCTGAAGACCGAGGACACAGCCGTGTATTTTTGTTCTAGAGGAGGATATTATGATGGAAGTCCTTATTACTGGAACCGTCCTGATGCTTTTGATATCTGGGGCCTAGGGACAATGGTCACCGTCTCTTC	QVQLVESGGGLVKPGRSLRLSCTVSGFTFGAYAMSWFRQAPGKGLEWVGFIRSKTYGGTTEYAASLKGRFTISRDDSKSIAFLQMNSLKTEDTAVYFCSRGGYYDGSPYYWNRPDAFDIWGLGTMVTVS		VL1-44	JL2	CAGTCTGTGCTGACTCAGCCACCCTCAGCGTCTGGGACCCCCGGGCAGAGGATCACCATCTCTTGTTCTGGAAGCAGCTCCAACATCGGAAGTAATACTGTGAACTGGTACCAACAGCTCCCAGGAACGGCCCCCAAACTCCTCATCTATAGTAATAATCAACGGCCCTCAGGGGTCCCTGACCGATTCTCTGGCTCCAAGTCTGGCACCTCAGCCTCCCTGGCCATCAGTGGGGTCCAGTCTGAGGATGAGGCTGATTATTACTGTGCAGCATGGGATGACAGCCTGAATGGTCCAGATGTGGTATTCGGCGGAGGGACCAAGCTGACCGTCCTAG	QSVLTQPPSASGTPGQRITISCSGSSSNIGSNTVNWYQQLPGTAPKLLIYSNNQRPSGVPDRFSGSKSGTSASLAISGVQSEDEADYYCAAWDDSLNGPDVVFGGGTKLTVL		1.875	n.d.	n.d.	n.d.	n.d.	n.d.	n.d.	n.d.	n.d.	n.d.	91.1093	837.792
	C537	6.2m	VH4-39	JH3	CAGCTGCAGCTGCAGGAGTCGGGCCCAGGACTGGTGAAGCCTTCGGAGACCCTGTCCCTCACCTGCACTGTCTCTGGTGGCGCCATCAGCAGTAGGAATTACCACTGGGGCTGGATCCGCCAGCCCCCAGGGAAGGGACTGGAGTGGATTGGGAGCATCTATTATAGTGGGAGCACATACTACAGCCCGTCCCTCAAGAGTCGAGTCACCATATCCGTCGACACGTCCAAAAACCAATTCTCCCTGAGGCTGAGTTCTGTGACCGCCGCAGACACGGCTGTGTATTACTGTGCGAGACTGGAGACCAGTGGCTGGTACACGGAGGATGTTTTTGATATCTGGGGCCAAGGGACAATGGTCACCGTCTCTTCAG	QLQLQESGPGLVKPSETLSLTCTVSGGAISSRNYHWGWIRQPPGKGLEWIGSIYYSGSTYYSPSLKSRVTISVDTSKNQFSLRLSSVTAADTAVYYCARLETSGWYTEDVFDIWGQGTMVTVSS		VK1-39	JK2	GACATCCAGATGACCCAGTCTCCATCCTCCCTGTCTGCATCTGTAGGAGACAGAGTCACCATCACTTGCCGGGCAAGTCAGAGCATTAGCAGTTATTTAAATTGGTATCAGCAGAAACCAGGGAAAGCCCCTAAGCTCCTGATCTATGCTGCGTCCAGTTTACAAAGTGGGGTCCCATCAAGGTTCAGTGGCAGTGGATCTGGGACAGATTTCACTCTCACCATCAGCAGTCTTCTACCTGAAGATTTTGCAACTTACTACTGTCAACGGAGTTACAGTGCGATGTACACTTTTGGCCAGGGGACCAAGCTGGAGATCAAAC	DIQMTQSPSSLSASVGDRVTITCRASQSISSYLNWYQQKPGKAPKLLIYAASSLQSGVPSRFSGSGSGTDFTLTISSLLPEDFATYYCQRSYSAMYTFGQGTKLEIK		41.85	n.d.	n.d.	n.d.	n.d.	n.d.	n.d.	n.d.	n.d.	n.d.	>10000	>10000
	C538	6.2m	VH4-39	JH4	CAGCTGCAGCTGCAGGAGTCGGGCCCAGGACTGGTGAAGCCTTCGGAGACCCTGTCCCTCACCTGCACTGTCTCTGGAGGCTCCATCAGTAGTAGCTCTTACTACTGGGCCTGGATCCGCCAGCCCCCCGGAAAGGGACTGGAGTGGATTGGGAACATCTATTATAGTGGGATCACCTACTACAGCCCGTCCCTCAAGAGTCGAGTCACCATATCCGTAGACACGTCCAAGAACCAGTTCTCCCTGAAGTTGAGGTCTGTGACCGCCGCGGACACGGCTGTCTATTACTGTGCGAGACAACATCGTTATGGTTCGGGGAGTTCTGAGCTTCTGTGGGGCCAGGGAACCCTGGTCACCGTCTCCTCAG	QLQLQESGPGLVKPSETLSLTCTVSGGSISSSSYYWAWIRQPPGKGLEWIGNIYYSGITYYSPSLKSRVTISVDTSKNQFSLKLRSVTAADTAVYYCARQHRYGSGSSELLWGQGTLVTVSS		VL2-8	JL2	CAGTCTGCCCTGACTCAGCCTCCCTCCGCGTCCGGGTCTCCTGGACAGTCAGTCACCATCTCCTGCACTGGAACCAGCAGTGACGTTGGTAGTTATAACTATGTCTCCTGGTACCAACAGCACCCAGGCAAAGCCCCCAAACTCATGATTTATGAGGTCACTAAGCGGCCCTCAGGGGTCCCTGATCGCTTCTCTGGCTCCAAGTCTGGCAACACGGCCTCCCTGACCGTCTCTGGGCTCCAGGCTGACGATGAGGCTGATTATTATTGCAGTTCATATGCAGGCAGCAGCAATTTGATATTCGGCGGAGGGACCAAGCTGACCGTCCTAG	QSALTQPPSASGSPGQSVTISCTGTSSDVGSYNYVSWYQQHPGKAPKLMIYEVTKRPSGVPDRFSGSKSGNTASLTVSGLQADDEADYYCSSYAGSSNLIFGGGTKLTVL		3.945	n.d.	n.d.	n.d.	n.d.	n.d.	n.d.	n.d.	n.d.	n.d.	>10000	>10000
	C539	6.2m	VH3-9	JH4	GAAGTGCAGCTGGTGGAGTCTGGGGGAGGCTTGGTACAGCCTGGCAGGTCCCTGAGACTCTCCTGTGCAGCCTCTGGATTCACCTTTGATGATTATGCCTTGCACTGGGTCCGACAAGCTCCAGGGAAGGGCCTGGAATGGGTCTCAGGTATTAGTTGGAATGGTGATAGCATAGGCTATGCGGACTCTGTGAAGGGCCGATTCACCATCTCCAGAGACAACGCCAAGAACTCCCTCTCTCTGCAAATGAACAGTCTGACAGCTGAGGACACGGCCTTGTATTACTGTGCAAAAGGGGTCGAGTATAGCAGCTCGAGCAACTGTGACTACTGGGGCCAGGGAACCCTGGTCACCGTCTCCTCAG	EVQLVESGGGLVQPGRSLRLSCAASGFTFDDYALHWVRQAPGKGLEWVSGISWNGDSIGYADSVKGRFTISRDNAKNSLSLQMNSLTAEDTALYYCAKGVEYSSSSNCDYWGQGTLVTVSS		VK1D-1	JK4	GACATCCAGATGACCCAGTCTCCATCTTCTGTGTCTGCATCTGTAGGAGACAGAGTCACCATCACTTGTCGGGCGAGTCAGGATATTAGCAGCTGGTTAGCCTGGTATCAGCAGAAACCAGGGAAAGCCCCTAAACTCCTGATCTCTCTTGCATCCGGTTTGCAAAGTGGGGTCCCATCAAGGTTCAGCGGCAGTGGATCTGAGACAGATTTCACTCTCACTATCAGCAGCCTGCAGCCTGAAGATTTTGCAACTTACTATTGTCAACAGACTAACAGTTTCCCTCTCACTTTCGGCGGAGGGACCAAGGTGGAAATCAA	DIQMTQSPSSVSASVGDRVTITCRASQDISSWLAWYQQKPGKAPKLLISLASGLQSGVPSRFSGSGSETDFTLTISSLQPEDFATYYCQQTNSFPLTFGGGTKVEI		1.302	1.163	1.789	1.374	1.413	1.791	1.49	1.432	1.603	1.917	657.712	>10000
	C540	6.2m	VH3-13	JH2	GAGGTGCAGCTGGTGGAGTCTGGGGGAGGCTTGGTACAGCCTGGGGGGTCCCTGAGACTCTCCTGTGCAGCCTCTGGATTCACGTTCAGGAACTACGACATGCACTGGGTCCGCCAAGTTGCAGGAAAAGGTCTAGAGTGGGTCTCAGCTATTGGCACTTCTGGTGACACATACTATCCAGACTCCGTGAAGGGCCGATTCACCATCTCCAGAGAAAATGCCAAGAACTCCGTGTATCTTCAAATGAACAACTTGAGAGCCGGGGACACGGCTGTGTATTTCTGTGTAAGAGATCGGGAAATCAGTGGCTGGACCGGCTGGTACTTCGATCTCTGGGGCCGTGGCACCCTGGTCACCGTCTCCTCAG	EVQLVESGGGLVQPGGSLRLSCAASGFTFRNYDMHWVRQVAGKGLEWVSAIGTSGDTYYPDSVKGRFTISRENAKNSVYLQMNNLRAGDTAVYFCVRDREISGWTGWYFDLWGRGTLVTVSS		VK1-39	JK5	GACATCCAGATGACCCAGTCTCCATCCTCCCTGTCTGCATCTGTTGGAGACAGAGTCACCATCACTTGCCGGGCAAGTCAGACCATTCATAATTATTTAAATTGGTATCAACAAATACCAGGGAAAGCCCCTAGGCTCCTGATCTATGCTACAAACACTTTGCAAAGTGGGGTCCCATCAAGGTTCAGTGGCAGTGGATCTGGGACAGATTTCACTCTCACCATCACCGGTCTGCAACCTGAAGATTTTGCAACTTATTACTGTCAACAGAGTTACAGTACTCCCCCGATCACGTTCGGCCAGGGGACACGACTGGAGATTAAAC	DIQMTQSPSSLSASVGDRVTITCRASQTIHNYLNWYQQIPGKAPRLLIYATNTLQSGVPSRFSGSGSGTDFTLTITGLQPEDFATYYCQQSYSTPPITFGQGTRLEIK		2.904	1.716	2.319	1.774	1.783	2.617	1.962	1.881	2.429	2.392	7379.68	>10000
	C542	6.2m	VH3-66	JH4	GAGGTGCAGCTGGTGGAGTCTGGGGGAGGCTTGGTCCAGCCTGGGGGGTCCCTGAGACTCTCCTGTGCAGCCTCTGGACTCACCGTCACTAGCAATTACATGAGCTGGGTCCGCCAGGCTCCAGGGAGGGGCCTTGAGTGGGTCTCACTTATTTATCCCGGTGGAACCACTTACTACGCAGACTCCGTGAAGGGCCGATTCACCGTCTCCAGAGACAATTCTAAGAACACGCTGTATCTTCAAATGGACAGCCTGAGAGCTGAGGACACGGGTGTCTATTACTGTGCGAGAGAAACCCTTGGCAGGGGGGGCGACTGCTGGGGCCAGGGAACCCTGGTCACCGTCTCCTCAG	EVQLVESGGGLVQPGGSLRLSCAASGLTVTSNYMSWVRQAPGRGLEWVSLIYPGGTTYYADSVKGRFTVSRDNSKNTLYLQMDSLRAEDTGVYYCARETLGRGGDCWGQGTLVTVSS		VK1-33	JK2	GACATCCAGATGACCCAGTCTCCATCCTCCCTGTCCGCATCTGTAGGAGACAGAGTCACCATCACTTGCCAGGCGAGTCAGGACATAAGCAACTTTTTAAATTGGTATCAGCAGAAACCAGGGAAAGCCCCTAAGCTCCTGATCTACGATGCATCCAATTTGGAAACAGGGGTCCCATCAAGGTTCAGTGGAAGTAGATCTGGGACAGATTTTACTTTCACCATCAGCAGCCTGCAGCCTGACGATATTGCAACATATTACTGTCAACAGTATGATAATCTCCCTCGGAGTTTTGGCCAGGGGACCAAGCTGGAGATCAAAC	DIQMTQSPSSLSASVGDRVTITCQASQDISNFLNWYQQKPGKAPKLLIYDASNLETGVPSRFSGSRSGTDFTFTISSLQPDDIATYYCQQYDNLPRSFGQGTKLEIK		1.073	1.082	0.69	1.797	1.764	1.553	2.326	1.473	1.422	1.384	16.461	97.2496
	C543	6.2m	VH3-30	JH6	CAGGTGCAGCTGGTGGAGTCTGGGGGAGGCGTGGTCCAGCCTGGGAGGTCCCTGAGACTCTCCTGTACAGCCTCTGGATTCACCTTCAGTACCGCTGGCATGCACTGGGTCCGCCAGGCTCCAGGCAAGGGGCTGGAGTGGGTGGCAGTGATATCATATGATGGAAGTAATAAAGACTATGCAGACTCCGTGAAGGGCCGATTCACCATCTCCAGAGACAATTCCAAGAGCACGCTGTATTTGCAAATGAACAGCCTGAGACCTGAGGACACGGCTGTGTATTATTGTGCGAAAGATACCCCCGGAGGGGACGATATTATGACTGGCTGGGGGTTATACGGTATGGACGTCTGGGGCCAAGGGACCACGGTCACCGTCTCCTCA	QVQLVESGGGVVQPGRSLRLSCTASGFTFSTAGMHWVRQAPGKGLEWVAVISYDGSNKDYADSVKGRFTISRDNSKSTLYLQMNSLRPEDTAVYYCAKDTPGGDDIMTGWGLYGMDVWGQGTTVTVSS		VK1-39	JK1	GACATCCAGATGACCCAGTCTCCATCCTCCCTGTCTGCATCTGTAGGAGACAGAGTCACCATCACTTGCCGGGCAAGTCAGAGTATTAGCAGTTATTTAAATTGGTATCACCAGAAACCAGGGAAAGCCCCTAAGCTCCTGATCTATGCTGCAATCAGTTTGCAAAGTGGGGTCCCATCAAGGTTCAGTGGCAGTGGATTTGGGACAGATTTCACTCTCACCATCAGCAGTCTGCAACCTGAAGATTTTGCAATTTACTACTGTCAACAGAGTTACAGTACCCCCTGGACGTTCGGCCAAGGGACCAAGGTGGAGATCAAAC	DIQMTQSPSSLSASVGDRVTITCRASQSISSYLNWYHQKPGKAPKLLIYAAISLQSGVPSRFSGSGFGTDFTLTISSLQPEDFAIYYCQQSYSTPWTFGQGTKVEIK		1.28	1.411	1.226	3.842	4.641	2.778	2.229	1.663	2.278	1.851	1389.22	>10000
	C544	6.2m	VH1-8	JH2	CAGGTGCAGCTGGTGCAGTCTGGGGCTGAGGTGAAGAAGCCTGGGGCCTCAGTGAAGGTCTCCTGCAAGGCTTCTGGATACACCTTCTCCAGTCATGATATCAACTGGGTGCGACAGGCCACGGGACAAGGGCTTGAGTGGGTGGGATGGATGAACCCTAACAGTGGTAACACAGGCTCTGCACAGAGCTTCCAGGGCAGAGTCACCTTGACCAGGAACGCCTCCATAAGCACAGCCTATTTGGAACTGAGCAGCCTGAGATCTGAGGACACGGCCGTGTATTTCTGTGCGAGAGGGTTCAGCCTGACTTGGTACTTCGATCTCTGGGGCCGTGGCACCCTGGTCACCGTCTCCTCAG	QVQLVQSGAEVKKPGASVKVSCKASGYTFSSHDINWVRQATGQGLEWVGWMNPNSGNTGSAQSFQGRVTLTRNASISTAYLELSSLRSEDTAVYFCARGFSLTWYFDLWGRGTLVTVSS		VL3-21	JL2	TCCTATGAGCTGACTCAGCCACCCTCGGTGTCAGCGGCCCCAGGAAAGACGGCCAGGATTACCTGTGGGGGAAACAACATTGGAGGTAAAAATGTGCACTGGTACCAGCAGAAGCCAGGCCAGGCCCCTGTGTTGGTCGTCTTTGATGATAGCGACCGGCCCTCAGGGATCCCTGAGCGATTCTCTGGCTCCAACTCTGGGAACACGGCCACCCTGACCATCAGCAGGGTCGAAGCCGGGGATGAGGCCGACTATTACTGTCAGCTGTGGGATAGTACTAGTGATCATCCCGATGTGGTATTCGGCGGAGGGACCCAGCTGACCGTCCTAG	SYELTQPPSVSAAPGKTARITCGGNNIGGKNVHWYQQKPGQAPVLVVFDDSDRPSGIPERFSGSNSGNTATLTISRVEAGDEADYYCQLWDSTSDHPDVVFGGGTQLTVL		2.343	2.048	2.728	2.093	2.152	2.85	2.211	2	2.332	2.372	2413.78	>10000
	C545	6.2m	VH3-21	JH4	GAGGTGCAGCTGTTGGAGTCTGGGGGAGGCCTGGTCAAGCCTGGGGGGTCCCTGAGACTCTCCTGTGCAGCCTCTGGATTCACCTTCAGTGACTACAGTATGACCTGGGTCCGCCAGGCTCCAGGGAAGGGGCTGGAGTGGGTCTCATTCATTAGTAGTAGTAGTACTTACATATATTACGCAGACTCAGTGAAGGGCCGCTTCACCATCTCCAGAGACAACGCCAAGAGCTCACTGTATCTGCAAATGAATAGACTGAGAGCCGAGGACACGGCTGTATATTACTGTACGAGAGTTCAAGTGGGCGCTAGGGGGTGGGCTGACTACTGGGGCCAGGGAACCCTGGTCACCGTCTCCTCAG	EVQLLESGGGLVKPGGSLRLSCAASGFTFSDYSMTWVRQAPGKGLEWVSFISSSSTYIYYADSVKGRFTISRDNAKSSLYLQMNRLRAEDTAVYYCTRVQVGARGWADYWGQGTLVTVSS		VL6-57	JL3	AATTTTATGCTGACTCAGCCCCTCTCTGTGTCGGAGTCTCCGGGGAAGACGGTAACCATCTCCTGCACCCGCAGCAGTGGCAGCATTGCCAGCAACTATGTGCAGTGGTACCAGCAGCGCCCGGGCGGTGCCCCCACCACTGTCATCTATGAGGATACCCAAAGACCCTCTGGGGTCCCTGATCGGTTCTCTGGCTCCATCGACAGCTCCTCCAACTCTGCCTCCCTCACCATCTCTGGACTGAAGACTGAGGACGAGGCTGACTACTACTGTCAGTCTTGTGATACCATCAATTGGGTGTTCGGCGGAGGGACCAAGCTGACCGTCGTAG	NFMLTQPLSVSESPGKTVTISCTRSSGSIASNYVQWYQQRPGGAPTTVIYEDTQRPSGVPDRFSGSIDSSSNSASLTISGLKTEDEADYYCQSCDTINWVFGGGTKLTVV		3.677	1.839	2.074	1.542	3.426	2.74	2.624	1.377	1.192	1.655	2711.36	>10000
	C546	6.2m	VH3-23	JH5	GAGGTGCAGCTGTTGGAGTCTGGGGGAGGCTTGGTACACCCTGGGGGGTCCCTGAGACTCTCCTGTGCCGCCTCTGGATTCACCTTTAGCACCTATGCCATGCACTGGGTCCGCCAGGCTCCAGGGAAGGGGCTGGAGTGGGTCTCAGCTATTAGTGGTAGTGGTACTGGCACATTCTACGCAGACTCCGTGAAGGGCCGGTTCAGCATCTCCAGAGACAATTCCAAGAACACCCTGTATCTGCAAATGAACAGCCTGAGAGCCGAGGACACGGCCGTATATTACTGTGCGACAGAACGTATAGCAGTGTCTGATACGCGGATGTACAACTGGTTCGACCCCTGGGGCCAGGGAACCCTGGTCACCGTCTCCTCAG	EVQLLESGGGLVHPGGSLRLSCAASGFTFSTYAMHWVRQAPGKGLEWVSAISGSGTGTFYADSVKGRFSISRDNSKNTLYLQMNSLRAEDTAVYYCATERIAVSDTRMYNWFDPWGQGTLVTVSS		VK1-39	JK1	GACATCCAGATGACCCAGTCTCCATCCTCCCTGTCTGCATCTGTAGGAGACAGAGTCACCCTCACTTGCCGGGCAAGTCAGGGCATTAGCACCTATCTAAATTGGTATCAGCAGAAACCAGGGAAAGCCCCTAACCTCCTGATCTATGCTGCATCCAGTTTGCAAAGTGGGGTCCCATCAAGGTTCAGTGGCAGTGGATCTGGGACAGATTTCACTCTCACCATCAGCAGTCTGCAACCTGAAGATTTTGCAACTTACTACTGTCAACAGAGTTACAGTGCCCCTCCGTGGACGTTCGGCCAAGGGACCAAGGTGGAAATCAAAC	DIQMTQSPSSLSASVGDRVTLTCRASQGISTYLNWYQQKPGKAPNLLIYAASSLQSGVPSRFSGSGSGTDFTLTISSLQPEDFATYYCQQSYSAPPWTFGQGTKVEIK		3.57	2.28	2.438	10.79	24.5	25.91	38.13	10.85	12.37	8.973	>10000	>10000
	C547	1.3m	VH3-30	JH6	CAGGTGCAGCTGGTGGAGTCTGGGGGAGGCGTGGTCCAGCCTGGGAGGTCCCTGAGACTCTCCTGTGCAGCCTCTGGATTCACCTTCAGTAGCTATGGCATGCACTGGGTCCGCCAGGCTCCAGGCAAGGGGCTGGAGTGGGTGGCAGTTATATCATATGATGGAAGTAATAAATACTATGCAGACTCCGTGAAGGGCCGATTCACCATCTCCAGAGACAATTCCAAGAACACGCTGTATCTGCAAATGAACAGCCTGAGAGCTGAGGACACGGCTGTGTATTACTGTGCGAAAGATACCCCCGGAGGGGACGATATTTTGACTGGCTGGGGGTTATACGGTATGGACGTCTGGGGCCAAGGGACCACGGTCACCGTCTCCTCA	QVQLVESGGGVVQPGRSLRLSCAASGFTFSSYGMHWVRQAPGKGLEWVAVISYDGSNKYYADSVKGRFTISRDNSKNTLYLQMNSLRAEDTAVYYCAKDTPGGDDILTGWGLYGMDVWGQGTTVTVSS		VK1-39	JK1	GACATCCAGATGACCCAGTCTCCATCCTCCCTGTCTGCATCTGTAGGAGACAGAGTCACCATCACTTGCCGGGCAAGTCAGAGCATTAGCAGCTATTTAAATTGGTATCAGCAGAAACCAGGGAAAGCCCCTAAGCTCCTGATCTATGCTGCATTCAGTTTGCAAAGTGGGGTCCCATCAAGGTTCAGTGGCAGTGGATCTGGGACAGATTTCACTCTCACCATCAGCAGTCTGCAACCTGAAGATTTTGCAACTTACTACTGTCAACAGAGTTACAGTACCCCCTGGACGTTCGGCCAAGGGACCAAGGTGGAAATCAAAC	DIQMTQSPSSLSASVGDRVTITCRASQSISSYLNWYQQKPGKAPKLLIYAAFSLQSGVPSRFSGSGSGTDFTLTISSLQPEDFATYYCQQSYSTPWTFGQGTKVEIK		1.784	1.883	2.808	11.65	19.19	17.39	4.993	3.084	4.115	4.02	5301.94	>10000
	C548	1.3m	VH1-69	JH6	CAGGTGCAGCTGGTGCAGTCTGGGGCTGAGGTGAAGAAGCCTGGGTCCTCGGTGAAGGTCTCCTGCAAGGCTTCTGGAGGCACCTTCAGCAGCTATGCTATCAGCTGGGTGCGACAGGCCCCTGGACAAGGGCTTGAGTGGATGGGAGGGATCATCCCTATCTTTGGTACAGCAAACTACGCACAGAAGTTCCAGGGCAGAGTCACGATTACAGCGGACGAATCCACGAGCACAGCCTACATGGAGCTGAGCAGCCTGAGATCTGAGGACACGGCCGTGTATTACTGTGCGAGGAGGGAGGCCTATGGTCCACGGGATTACTACTACTACTACGGTATGGACGTCTGGGGCCAAGGGACCACGGTCACCGTCTCCTCA	QVQLVQSGAEVKKPGSSVKVSCKASGGTFSSYAISWVRQAPGQGLEWMGGIIPIFGTANYAQKFQGRVTITADESTSTAYMELSSLRSEDTAVYYCARREAYGPRDYYYYYGMDVWGQGTTVTVSS		VL9-49	JL3	CAGTCTGCCCTGACTCAGCCACCTTCTGCATCAGCCTCCCTGGGAGCCTCGGTCACACTCACCTGCACCCTGAGCAGCGGCTACAGTAATTATAAAGTGGACTGGTACCAGCAGAGACCAGGGAAGGGCCCCCGGTTTGTGATGCGAGTGGGCACTGGTGGGATTGTGGGATCCAAGGGGGATGGCATCCCTGATCGCTTCTCAGTCTTGGGCTCAGGCCTCAATCGGTACCTGACCATCAAGAACATCCAGGAAGAGGATGAGAGTGACTACCACTGTGGGGCAGACCAAGGCAGTGGGAGCAACTTCGTGGGGGTGTTCGGCGGAGGGACCAAGCTGACCGTCCTAG	QSALTQPPSASASLGASVTLTCTLSSGYSNYKVDWYQQRPGKGPRFVMRVGTGGIVGSKGDGIPDRFSVLGSGLNRYLTIKNIQEEDESDYHCGADQGSGSNFVGVFGGGTKLTVL		1.717	1.9395	>10000	49.38	1.778	1.545	1.68	1.486	1.349	1.452	30.5062	207.189
	C549	6.2m	VH1-69	JH6	CAGGTGCAGCTGGTGCAGTCTGGGGCTGAGGTGAAGAAGCCTGGGTCCTCGGTGAAGGTCTCCTGCAAGGCTTCTGGAGGCACCTTCAGCACCTCTGCTATCAGCTGGGTGCGACAGGCCCCTGGACAAGGGCTTGAGTGGATGGGAGGGATCATACCTTTCTTTGGAACACCAAACTACGCACAGAAATTCCAGGGCAGAGTCACGATTATCGCGGACGAATCCACGACCACAGCCTACATGGAGCTGAGTGGCCTGAGATTTGAGGACTCGGCCGTGTATTACTGTGCGAGGAGGGAGCCCTATGGTCCACGGGATTACTACTACTTTTTCGGTATGGACGTCTGGGGCCCAGGGACCACGGTCACCGTCTCCTCA	QVQLVQSGAEVKKPGSSVKVSCKASGGTFSTSAISWVRQAPGQGLEWMGGIIPFFGTPNYAQKFQGRVTIIADESTTTAYMELSGLRFEDSAVYYCARREPYGPRDYYYFFGMDVWGPGTTVTVSS		VL9-49	JL3	CAGTCTGCCCTGACTCAGCCACCTTTTGCATCAGCCTCCCTGGGAGCCTCGGTCACACTCACCTGCACCCTGAGCAGCGACTACAGTTATTATAAAGTGGACTGGTACCAGCAGAGACCAGGGAAGGGCCCCCGGTTTGTCATTCGAGTGGGCCCTGGTGGGATTGTGGGATCCAAGGGGGATGGCTTCCCTGATCGCTTCTCAGTCTTGGGCTCAGGCCTGAATCGGTCCCTGACCATCAACAACATCCAGGAGGAGGATGAGGGTGACTACCACTGTGGGGCAGACGAGGGCAGTGGGGGCACCTTCGTGGGGGTGTTCGGCGGAGGGACCAAACTGACCGTCC	QSALTQPPFASASLGASVTLTCTLSSDYSYYKVDWYQQRPGKGPRFVIRVGPGGIVGSKGDGFPDRFSVLGSGLNRSLTINNIQEEDEGDYHCGADEGSGGTFVGVFGGGTKLTV		1.758	1.914	1.475	1.478	2.132	2.612	2.395	2.285	2.341	2.64	14.0737	32.0867
	C550	1.3m	VH5-51	JH5	GAGGTGCAGCTGGTGCAGTCTGGAGCAGAGGTGAAAAAGCCCGGGGAGTCTCTGAAGATCTCCTGTAAGGGTTCTGGATACAGATTTACCAACTACTGGATCGGCTGGGTGCGCCAGATGCCCGGGAAAGGCCTGGAGTGGATGGGGATCATCTATCCTGGTGACTCTGATACCAGATACAGCCCGTCCTTCCAAGGCCAGGTCACCATCTCAGCCGACAAGTCCATCACCACCGCCTACCTGCAGTGGAGCAGCCTGAAGGCCTCGGACACCGCCATGTATTACTGTGCGAGACTCAGTGACCGCTGGTACAGTCCGTTCGACCCCTGGGGCCAGGGAACCCTGGTCACCGTCTCCTCAG	EVQLVQSGAEVKKPGESLKISCKGSGYRFTNYWIGWVRQMPGKGLEWMGIIYPGDSDTRYSPSFQGQVTISADKSITTAYLQWSSLKASDTAMYYCARLSDRWYSPFDPWGQGTLVTVSS		VK3-15	JK3	GAAATAGTGATGACGCAGTCTCCAGCCACCCTGTCTGTGTCTCCAGGGGAAAGAGCCACCCTCTCCTGCAGGGCCAGTCAGAGTGTTAGCAGCAACTTAGCCTGGTACCAGCAGAAACCTGGCCAGGCTCCCAGGCTCCTCATCTATGGTGCATCCACCAGGGCCACTGGTATCCCAGCCAGGTTCAGTGGCAGTGGGTCTGGGACAGAGTTCACTCTCACCATCAGCAGCCTGCAGTCTGAAGATTTTGCAGTTTATTACTGTCAGCAGTATAATAACTGGCCTCCGGGGGGATTCACTTTCGGCCCTGGGACCAAAGTGGATATCAAAC	EIVMTQSPATLSVSPGERATLSCRASQSVSSNLAWYQQKPGQAPRLLIYGASTRATGIPARFSGSGSGTEFTLTISSLQSEDFAVYYCQQYNNWPPGGFTFGPGTKVDIK		2.56	2.772	6.178	6.263	11.4	7.483	20.44	7.269	6.825	48.37	>10000	>10000
	C552	1.3m	VH3-30	JH4	CAGGTGCAGCTGGTGGAGTCTGGGGGAGGCGTGGTCCAGCCTGGGAGGTCCCTGAGACTCTCCTGTGCAGCCTCTGGATTCACCTTCAGTAGCTATGCTATGCACTGGGTCCGCCAGGCTCCAGGCAAGGGGCTAGAGTGGGTGGCACTTATATCATATGATGGAAGTAACAAACACTACGCAGACTCCGTGAAGGGCCGATTCACCATCTCCAGAGACAATTCCAAGAACACGCTGTATCTGCAAATGAACAGCCTGAGAGCTGAGGACACGGCTGTGTATTACTGTGCGAGAGCGGGAACTACTAATAGCGACTACTTTGACTACTGGGGCCAGGGAACCCTGGTCACCGTCTCCTCAG	QVQLVESGGGVVQPGRSLRLSCAASGFTFSSYAMHWVRQAPGKGLEWVALISYDGSNKHYADSVKGRFTISRDNSKNTLYLQMNSLRAEDTAVYYCARAGTTNSDYFDYWGQGTLVTVSS		VL3-21	JL3	TCCTATGAGCTGACACAGCCACCCTCAGTGTCAGTGGCCCCAGGAAAGACGGCCAGGATTACCTGTGGGGGAAACAACATTGGAAGTAAAAGTGTGCACTGGTACCAGCAGAAGCCAGGCCAGGCCCCTGTGCTGGTCATCTATTATGATACCGACCGGCCCTCAGGGATCCCTGAGCGATTCTCTGGCTCCAACTCTGGGAACACGGCCACCCTGACCATCAGCAGGGTCGAAGCCGGGGATGAGGCCGACTATTACTGTCAGGTGTGGGATAGTAGTAGTGCCCTTTGGGTGTTCGGCGGAGGGACCAAGCTGACCGTCCTAG	SYELTQPPSVSVAPGKTARITCGGNNIGSKSVHWYQQKPGQAPVLVIYYDTDRPSGIPERFSGSNSGNTATLTISRVEAGDEADYYCQVWDSSSALWVFGGGTKLTVL		1.081	1.162	1.14	1.408	1.366	2.166	1.771	1.476	1.908	1.989	3095.35	>10000
	C553	6.2m	VH3-30	JH4	CAGGTGCAGCTGGTGGAGTCTGGGGGAGGCGTGGTCCAGCCTGGGAGGTCCCTGAGACTCTCCTGTGCAGCCTCTGGATTCACCTTCAGTAACTATGAAATACACTGGGTCCGCCAGGCTCCAGGCAAGGGGCTAGAGTGGGTGGCAGGTATATCATATGATGGAAGTACTAAATACTACGCAGACTCCGTGAAGGGCCGATTCACCATCTCCAGAGACAATTCCAAGAACACGCTGTATCTGCAAATGAACAGCCTGAGACCTGAGGACACGGCTGTGTTTTACTGTGCGAGAGCGGGAACTACTAATAGCGACTACTTTGACTACTGGGGCCAGGGAACCCTGGTCACCGTCTCCTCAG	QVQLVESGGGVVQPGRSLRLSCAASGFTFSNYEIHWVRQAPGKGLEWVAGISYDGSTKYYADSVKGRFTISRDNSKNTLYLQMNSLRPEDTAVFYCARAGTTNSDYFDYWGQGTLVTVSS		VL3-21	JL3	TCCTATGAGCTGACTCAGCCACCCTCAGTGTCAGTGGCCCCAGGAATGACGGCCAGGATTACCTGTGGGGGAAACACCATTGGAAGTAAAAGTGTGCACTGGTACCAGCAGAAGGCAGGCCAGGCCCCTGTGTTGGTCATCTATTATGATAGCGACCGGCCCTCAGGGATCCCTGAGCGATTCTCTGGCTCCAACTCTGGGAACACGGCCACCCTGACCATCAGCAGGGTCGAAGCCGGGGATGAGGCCGACTATTACTGTCAGGTGTGGGATAGTAGTAGTGTCCTTTGGGTGTTCGGCGGAGGGACCAAGCTGACCGTCCTAG	SYELTQPPSVSVAPGMTARITCGGNTIGSKSVHWYQQKAGQAPVLVIYYDSDRPSGIPERFSGSNSGNTATLTISRVEAGDEADYYCQVWDSSSVLWVFGGGTKLTVL		1.194	1.266	1.129	1.772	1.729	2.476	2.109	1.9	2.284	2.384	687.374	>10000
	C554	1.3m	VH3-15	JH6	GAGGTGCAGCTGGTGGAGTCTGGGGGAGGCTTGGTAAAGCCTGGGGGGTCCCTTAGACTCTCCTGTGCAGCCTCTGGATTCACTTTCAGTAACGCCTGGATGAGCTGGGTCCGCCAGGCTCCAGGGAAGGGGCTGGAGTGGGTTGGCCGTATTAAAAGCAAAACTGATGGTGGGACAACAGACTACGCTGCACCCGTGAAAGGCAGATTCACCATCTCAAGAGATGATTCAAAAAACACGCTGTATCTGCAAATGAACAGCCTGAAAACCGAGGACACAGCCGTGTATTACTGTACCACAGATGACCCTGGGAGCTACTACTACGGTATGGACGTCTGGGGCCAAGGGACCACGGTCACCGTCTCCTCA	EVQLVESGGGLVKPGGSLRLSCAASGFTFSNAWMSWVRQAPGKGLEWVGRIKSKTDGGTTDYAAPVKGRFTISRDDSKNTLYLQMNSLKTEDTAVYYCTTDDPGSYYYGMDVWGQGTTVTVSS		VL7-46	JL3	CAGACTGTGGTGACCCAGGAGCCCTCACTGACTGTGTCCCCAGGAGGGACAGTCACTCTCACCTGTGGCTCCAGCACTGGAGCTGTCACCAGTGGTCATTATCCCTACTGGTTCCAGCAGAAGCCTGGCCAAGCCCCCAGGACACTGATTTATGATACAAGCAACAAACACTCCTGGACACCTGCCCGGTTCTCAGGCTCCCTCCTTGGGGGCAAAGCTGCCCTGACCCTTTCGGGTGCGCAGCCTGAGGATGAGGCTGAGTATTACTGCTTGCTCTCCTATAGTGGTGCTCGAGTGTTCGGCGGAGGGACCAAGCTGACCGTCCTAG	QTVVTQEPSLTVSPGGTVTLTCGSSTGAVTSGHYPYWFQQKPGQAPRTLIYDTSNKHSWTPARFSGSLLGGKAALTLSGAQPEDEAEYYCLLSYSGARVFGGGTKLTVL		8.2	2.357	7.007	>10000	11.96	19.72	32.37	10.86	5.703	7.508	>10000	>10000
	C555	6.2m	VH3-15	JH6	GAGGTGCAGCTGGTGGAGTCTGGGGGAGGCTTGGTAAAGCCTGGGGGGTCCCTTAGACTCTCCTGTGCAGCCTCTGGACTCACTTTCAGTACCACCTGGATGAGCTGGGTCCGCCAGGCTCCAGGGAAGGGGCTGGAGTGGGTTGGCCGAATTAAAAGCAAAGGTGATGGTGGGACAACAGACTTCGCTGGACCCGTGAAAGGCAGATTCTCCATCTCAAGAGATGATTCAAAAAACACTCTATATCTGCACATGAACAGCCTGAAAACCGAGGACACAGCCGTGTATTATTGTACCACAGATGACCCTGGGAGCTACTACTACGGAATGGACGTCTGGGGCCAAGGGACCACGGTCACCGTCTCCTCA	EVQLVESGGGLVKPGGSLRLSCAASGLTFSTTWMSWVRQAPGKGLEWVGRIKSKGDGGTTDFAGPVKGRFSISRDDSKNTLYLHMNSLKTEDTAVYYCTTDDPGSYYYGMDVWGQGTTVTVSS		VL7-46	JL3	CAGACTGTGGTGACCCAGGAGCCCTCACTGACTGTGTCCCCAGGAGGGACAGTCACTCTCACCTGTGCCTCCAGCACTGGAGCTGTCACCAGTGGTCATTATCCCTACTGGTTCCAGCAGAAGCCTGGCCAAGCCCCCCGGACACTGATTTATGCTACAAGCAACAAACACTCTTGGACACCTGCCCGGTTCTCAGGCTCCCTCCTTGGGGGCAAAGCTGCCCTGACCCTTTCGGGTGCGCAGCCTGAGGATGAGGCTGACTATTACTGCTTGCTCTCCTATAGTGGTGCTCGAGTGTTCGGCGGAGGGACCAAGCTGACCGTCCTAG	QTVVTQEPSLTVSPGGTVTLTCASSTGAVTSGHYPYWFQQKPGQAPRTLIYATSNKHSWTPARFSGSLLGGKAALTLSGAQPEDEADYYCLLSYSGARVFGGGTKLTVL		2.88	1.63	2.315	3.423	4.284	4.793	6.129	4.337	4.18	5.223	276.16	>10000
	C556	1.3m	VH1-46	JH4	CAGGTGCAGCTGGTGCAGTCTGGGGCTGAGGTGAAGAAGCCTGGGGCCTCAGTGAAGGTTTCCTGCAAGGCATCTGGATACACCTTCACCTACTACTATATGCACTGGGTGCGACAGGCCCCTGGACAAGGGCTTGAGTGGATGGGAATAATCAACCCTAGTGGTGGTAGCACAAGCTACGCACAGAAGTTCCAGGGCAGAGTCACCATGACCAGGGACACGTCCACGAGCACAGTCTACATGGAGCTGAGCAGCCTGAGATCTGAGGACACGGCCGTGTATTACTGTGCGAGACCCTTACTCCCTGGGGAAACGGGGAGTTTGAACCGACTTGACTACTGGGGCCAGGGAACCCTGGTCACCGTCTCCTCAG	QVQLVQSGAEVKKPGASVKVSCKASGYTFTYYYMHWVRQAPGQGLEWMGIINPSGGSTSYAQKFQGRVTMTRDTSTSTVYMELSSLRSEDTAVYYCARPLLPGETGSLNRLDYWGQGTLVTVSS		VK1-39	JK1	GACATCCAGATGACCCAGTCTCCATCCTCCCTGTCTGCATCTGTAGGAGACAGAGTCACCATCACTTGCCGGGCAAGTCAGAGCATTAGCAGCTATTTAAATTGGTATCAGCAGAAACCAGGGAAAGCCCCTAAGCTCCTGATCTATGCTGCATCCAGTTTGCAAAGTGGGGTCCCATCAAGGTTCAGTGGCAGTGGATCTGGGACAGATTTCACTCTCACCATCAGCAGTCTGCAACCTGAAGATTTTGCAACTTACTACTGTCAACAGAGTTACAGTACCTTATGGACGTTCGGCCAAGGGACCAAGGTGGAAATCAAAC	DIQMTQSPSSLSASVGDRVTITCRASQSISSYLNWYQQKPGKAPKLLIYAASSLQSGVPSRFSGSGSGTDFTLTISSLQPEDFATYYCQQSYSTLWTFGQGTKVEIK		1.364	1.88	2.286	1.348	1.532	1.443	1.242	1.124	1.101	0.8145	47.1826	738.163
	C557	6.2m	VH1-46	JH4	CAGGTGCAGCTGGTGCAGTCTGGGGCTGAAGTGAAGAAGCCTGGGGCCTCAGTGAAGGTTTCCTGCAAGGCATCTGGATACCCCTTCAGCAGATACTATATACACTGGGTGCGACAGGCCCCTGGACAAGGCCTTGAGTGGATGGGAATTATCAACCCTAGTGGTGGTAGCACAACCTACGCACAGAGGTTCCAGGGCAGAGTCACCATGACCAGGGACACGTCCGCGAGCACAGTCTACTTGGACCTAAGCAGCCTGGGATCTGAAGACTCGGCCGTGTATTACTGTGCGAGACCCTTACTCCCTGGGGAAACGGGGAATTTGAACCGACTTGACTACTGGGGCCAGGGAACCCTGGTCACCGTCTCCTCAG	QVQLVQSGAEVKKPGASVKVSCKASGYPFSRYYIHWVRQAPGQGLEWMGIINPSGGSTTYAQRFQGRVTMTRDTSASTVYLDLSSLGSEDSAVYYCARPLLPGETGNLNRLDYWGQGTLVTVSS		VK1-39	JK1	GACATCCAGATGACCCAGTCTCCATCCTCCCTGTCTGCATCTGTAGGAGACAGAGTCACCATCACTTGCCGGGCAAGTCAGAGCATTAGCAGCTATTTAAATTGGTATCAGCAGAAACCTGGGATAGCCCCTAAGCTCCTGATTTATGGTGCATCCAGTTTGCAAAGTGGGGTCCCATCAAGGTTCAGTGGCAGTGGATCTGGGACAGATTTCACTCTCACCATCAGCAGTGTGCAACCTGATGATTTTGCAACTTACTACTGTCAACAGAGTTACAGTACCTTATGGACGTTCGGCCAAGGGACCAAGGTGGAAATCAAAC	DIQMTQSPSSLSASVGDRVTITCRASQSISSYLNWYQQKPGIAPXLLIYGASSLQSGVPSRFSGSGSGTDFTLTISSVQPDDFATYYCQQSYSTLWTFGQGTKVEIK		2.179	1.254	2.261	1.238	1.693	2.013	1.341	1.178	0.9521	0.9152	21.521	2070.32
	C558	1.3m	VH5-51	JH4	GAGGTGCAGCTGGTGCAGTCTGGAGCAGAGGTGAAAAAGCCCGGGGAGTCTCTGAAGATCTCCTGTAAGGTTTCTGGATACACCTTTACCAACTACTGGATCGGCTGGGTGCGCCAGATGCCCGGGAAAGGCCTGGAGTGGATGGGGATCATCTATCCTGGTGACTCTGATACCAGATACAGCCCGTCCTTCCAAGGCCAGGTCACCATCTCAGCCGACAAGTCCATCATCACCGCCTACCTGCAGTGGAGCAGCCTGAAGGCCTCGGACACCGCCATGTATTACTGTGCGAGAGTCCCCTCCTCCTCGGACTACGGTGACTACGGGGGCTTTGAATACTGGGGCCAGGGAACCCTGGTCACCGTCTCCTCAG	EVQLVQSGAEVKKPGESLKISCKVSGYTFTNYWIGWVRQMPGKGLEWMGIIYPGDSDTRYSPSFQGQVTISADKSIITAYLQWSSLKASDTAMYYCARVPSSSDYGDYGGFEYWGQGTLVTVSS		VK1-39	JK2	GACATCCAGATGACCCAGTCTCCATCCTCCCTGTCTGCATCTGTAGGGGACAGAGTCACCATCACTTGCCGGGCAAGTCAGAGCATTAGCAGCTATTTAAATTGGTATCAGCAGAAACCAGGGAAAGCCCCTAAGCTCCTGATCTATGCTGCATCCAGTTTGCAGAGTGGGGTCCCATCAAGGTTCAGTGGCAGTGGATCTGGGACAGATTTCACTCTCACCATCAGCAGTCTGCAACCTGAAGATTTTGCAACTTACTACTGTCAACAGAGTTACAGTACCCCGTGCAGTTTTGGCCAGGGGACCAAGCTGGAGATCAAAC	DIQMTQSPSSLSASVGDRVTITCRASQSISSYLNWYQQKPGKAPKLLIYAASSLQSGVPSRFSGSGSGTDFTLTISSLQPEDFATYYCQQSYSTPCSFGQGTKLEIK		2.41	1.581	1.559	24.28	5.104	16.29	1.125	1.033	>10000	1.06	>10000	>10000
	C559	6.2m	VH5-51	JH4	GAGGTGCAGCTGGTGCAGTCTGGAGCAGAGGTGAAAAAGCCCGGGGAGTCTCTGAAGATCTCCTGTAAGGTCTCTGGATACACCTTTACCAACTACTGGATCGGCTGGGTGCGCCAGATGCCCGGGAAAGGCCTGGAGTGGATGGGAATCATCTTTCCTGGTGACTCTGATACGAGATACAGCCCGTCCTTCCAAGGCCAGGTCACCATCTCAGCCGACAGGTCCATCACCACCGCCTACCTGCAGTGGAGGAGCCTGAAGGCCTCGGACACCGCCATGTATTACTGTGCGAGAGTCCCCTCCTCCTCGGACTACGGTGACTACGGGGGCTTTGAATACTGGGGCCAGGGAACCCTGGTCACCGTCTCCTCAG	EVQLVQSGAEVKKPGESLKISCKVSGYTFTNYWIGWVRQMPGKGLEWMGIIFPGDSDTRYSPSFQGQVTISADRSITTAYLQWRSLKASDTAMYYCARVPSSSDYGDYGGFEYWGQGTLVTVSS		VK1-39	JK2	GACATCCAGATGACCCAGTCTCCATCCTCCCTGTCTGCATCTGTAGGAGACAGAGTCACCATCACTTGCCGGGCAAGTCAAACCATTACCATCTATTTAAATTGGTATCAGCAGAAACCAGGGAAAGCCCCTAAGCTCCTGATCTATGCTGCATCCAGTTTGCAGAGTGGGGTCCCATCTAGGTTCAGTGGCAGTGGATCTGGGACAGATTTCACTCTCACTATCAGCAGTCTGCAACCTGAAGATTTTGCAACGTACTACTGTCAACAGAGTTACAGTACCCCGTGTAGTTTTGGCCAGGGGACCAAGCTGGAGATCAAAC	DIQMTQSPSSLSASVGDRVTITCRASQTITIYLNWYQQKPGKAPKLLIYAASSLQSGVPSRFSGSGSGTDFTLTISSLQPEDFATYYCQQSYSTPCSFGQGTKLEIK		2.887	1.961	2	44.53	4.09	>10000	3.469	1.365	>10000	2.897	613.041	>10000
	C560	1.3m	VH3-9	JH3	GAAGTGCAGCTGGTGGAGTCTGGGGGAGGCTTGGTACAGCCTGGCAGGTCCCTGAGACTCTCCTGTGCAGCCTCTGGATTCACCTTTGATGATTATGCCATGCACTGGGTCCGGCAAGCTCCAGGGAAGGGCCTGGAGTGGGTCTCAGGTGTTAGTTGGAATAGTGGTACCATAGGCTATGCGGACTCTGTGAAGGGCCGATTCACCATCTCCAGAGACAACGCCAAGAACTCCCTGTATCTGCAAATGAACAGTCTGAGAGCTGAGGACACGGCCTTGTATTACTGTGCAAAAATCGCAGATATCGTCAGGGCTTACGATTTTTGGAGTGGCCAGCACTTTGATGCTTTTGATATCTGGGGCCAAGGGACAATGGTCACCGTCTCTTCAG	EVQLVESGGGLVQPGRSLRLSCAASGFTFDDYAMHWVRQAPGKGLEWVSGVSWNSGTIGYADSVKGRFTISRDNAKNSLYLQMNSLRAEDTALYYCAKIADIVRAYDFWSGQHFDAFDIWGQGTMVTVSS		VL1-44	JL2	CAGTCTGTGCTGACTCAGCCACCCTCAGCGTCTGGGACCCCCGGGCAGAGGGTCACCATCTCTTGTTCTGGAAGCAGCTCCAACATCGGAAGTAATACTGTAAACTGGTACCAGCAGCTCCCAGGAACGGCCCCCAAACTCCTCATCTATAGTAATAATCAGCGGCCCTCAGGGGTCCCTGACCGATTCTCTGGCTCCAAGTCTGGCACCTCAGCCTCCCTGGCCATCAGTGGGCTCCAGTCTGAGGATGAGGCTGATTATTACTGTGCAGCATGGGATGACAGCCTGGTGGTATTCGGCGGAGGGACCAAGCTGACCGTCCTAG	QSVLTQPPSASGTPGQRVTISCSGSSSNIGSNTVNWYQQLPGTAPKLLIYSNNQRPSGVPDRFSGSKSGTSASLAISGLQSEDEADYYCAAWDDSLVVFGGGTKLTVL		1.6	1.228	2.143	4.082	5.072	6.094	7.018	4.199	3.672	4.279	145.863	1947.93
	C561	6.2m	VH3-9	JH3	GAAGTGCAGCTGGTGGAGTCTGGGGGAGGCTTGGTACAACCTGGCAGGTCCCTGAGACTCTCCTGTGCAGCCTCTGGATTCACCTTTGATGATTATGCCATACACTGGGTCCGGCAAGCTCCAGGGAAGGGCCTGGAGTGGGTCTCTGGTGTTAGTTGGAATAGTGGTACCATAGGCTATGCGGACTCTGTGAAGGGCCGATTCTTCATCTCCAGAGACAACGCCAAGAACTCCCTGTATCTGCAAATGAACAGTCTGAGAGCTGAGGACACGGCCTGGTATTACTGTGCAAAAATCGCAGATTTGGTCGGGGCTTACGATTTTCGGAGTGGCCAGCACTTTGCTGCTTTTGATGTCTGGGGCCAAGGGACAATGGTCACCGTCTCTTCAG	EVQLVESGGGLVQPGRSLRLSCAASGFTFDDYAIHWVRQAPGKGLEWVSGVSWNSGTIGYADSVKGRFFISRDNAKNSLYLQMNSLRAEDTAWYYCAKIADLVGAYDFRSGQHFAAFDVWGQGTMVTVSS		VL1-44	JL2	CAGTCTGTGCTGACTCAGCCACCCTCAGCGTCTGGGACCCCCGGGCAGAGGGTCACCATCTCTTGTTCTGGAAGCAGCTCCAACATCGGAAGTAATACTGTAAACTGGTACCAGCATCTCCCAGGAACGGCCCCCAAACTCCTCATCTATAGTAATAATCAGCGGCCCTCAGGGGTCCCTGACCGATTCTCTGGCTCCAAGTCCGGCACCTCAGCCTCCCTGGCCATCAGTGGGCTCCAGTCTGAGGATGAGGCTGATTATTACTGTGCATCTTGGGATGACAGCCTGGTGGTATTCGGCGGAGGGACCAAGCTGACCGTCCTAG	QSVLTQPPSASGTPGQRVTISCSGSSSNIGSNTVNWYQHLPGTAPKLLIYSNNQRPSGVPDRFSGSKSGTSASLAISGLQSEDEADYYCASWDDSLVVFGGGTKLTVL		1.53	0.8889	1.087	2.561	2.722	2.478	2.864	2.87	3.174	3.192	47.0236	197.277
	C562	6.2m	VH3-33	JH4	GAAGTGCAGCTGGTGGAGTCTGGGGGAGGCGTGGTCCAGCCTGGGAAGTCCCTGAGACTCTCCTGTGCAGCGTCTGGATTCACCTTCAGGAGCTATGCCATGCACTGGGTCCGCCAGGCTCCAGGCAAGGGGCTGGAGTGGGTGGCAGTTATTTGGGATGATGGAAGTTCTAAACACTATTCAGACTCCGTGAAGGGCCACTTCACCATCTCCAGAGACAATTCCAAGAACACGCTGTATCTGCAAATGAACAGCCTGAGAGCCGAGGACACGGCTGTGTATTACTGTGCGAGAGATAGCAACGTGGATACAGTTATGGTTACGTGGTTTGACTACTGGGGCCAGGGAACAATGGTCACCGTCTCTTCAG	EVQLVESGGGVVQPGKSLRLSCAASGFTFRSYAMHWVRQAPGKGLEWVAVIWDDGSSKHYSDSVKGHFTISRDNSKNTLYLQMNSLRAEDTAVYYCARDSNVDTVMVTWFDYWGQGTMVTVSS		VK1-39	JK1	GACATCCAGATGACCCAGTCTCCATCCTCCCTGTCTGCATCTGTAGGAGACAGAGTCACCATCACTTGCCGGGCAAGTCAGAGCATTAGCAACTATTTAAATTGGTATCAGCAGAAACCGGGGAAAGCCCCTAACCTCCTGATCTATACTGCATCCAGTTTGCAAAGTGGGGTCCCATCAAGGTTCAGTGGCAGTGGATCTGGGACAGATTTCACTCTCACCATAAGCAGTCTGCAACCTGAAGATTTTGCAACTTACTACTGTCAACAGAGTTACAGTACCCCTCCCTGGACGTTCGGCCAAGGGACCAAGGTGGAAATCAAAC	DIQMTQSPSSLSASVGDRVTITCRASQSISNYLNWYQQKPGKAPNLLIYTASSLQSGVPSRFSGSGSGTDFTLTISSLQPEDFATYYCQQSYSTPPWTFGQGTKVEIK		2.554	n.d.	n.d.	n.d.	n.d.	n.d.	n.d.	n.d.	n.d.	n.d.	2552.29	>10000
	C563	6.2m	VH3-15	JH3	GAAGTGCAGCTGGTGGAGTCTGGGGGAGGCTTGGTAAAGCCGGGAGGGTCCCTTAGACTCTCCTGTGCAGCCTCTGGATTCCCTTTCACTAACGCCTGGATGAGCTGGGTCCGCCAGGCTCCAGGGAAGGGGCTGGAGTGGGTAGGCCACATTAAAGACTACACTGATGGTGGGACAACAGACTACGCTGCACCCGTGAAAGGCAAATTCACCATCTCAAGAGATGATTCAAAAAACACGCTCTATCTGCACATGAACAGCCTGAAAACCGAGGACACAGCCGTCTATTACTGTTCCACAGTGGGGTCGTATTACTATGATAGTCGTGGCCCTACCTCTGATGCTTTTGATATCTGGGGCCAAGGGACACTGGTCACCGTCTCCTCAG	EVQLVESGGGLVKPGGSLRLSCAASGFPFTNAWMSWVRQAPGKGLEWVGHIKDYTDGGTTDYAAPVKGKFTISRDDSKNTLYLHMNSLKTEDTAVYYCSTVGSYYYDSRGPTSDAFDIWGQGTLVTVSS		VK4-1	JK2	GACATCGTGATGACCCAGTCTCCAGACTCCCTGGCTGTGTCTCTGGGCGAGAGGGCCACCATCAACTGCAAGTCCAGCCAGAGTGTTTTATACAGCTCCAACAAAAAGAACTACTTAGCTTGGTACCGGCAGAAACCAGGACAGCCTCCTAAGTTGCTCATTTACTGGGCATCTACCCGGGAATCCGGGGTCCCTGACCGATTCAGTGGCAGCGGGTCTGGGACAGATTTCACTCTCACCATCAGCAGCCTGCAGGCTGAAGATGTGGCAGTTTATTACTGTCAGCAATATTATAGTACCCCGTACACTTTTGGCCAGGGGACCAAGCTGGAGATCAAAC	DIVMTQSPDSLAVSLGERATINCKSSQSVLYSSNKKNYLAWYRQKPGQPPKLLIYWASTRESGVPDRFSGSGSGTDFTLTISSLQAEDVAVYYCQQYYSTPYTFGQGTKLEIK		1.187	n.d.	n.d.	n.d.	n.d.	n.d.	n.d.	n.d.	n.d.	n.d.	4.51346	22.945
	C564	1.3m	VH3-23	JH5	GAGGTGCAGCTGTTGGAGTCTGGGGGAGGCTTGGTACAGCCTGGGACGTCCCTGAGACTCTCCTGTGCAGCCTCTGGATTCACCTTTAGCAGCTATGCCATGAGCTGGGTCCGCCAGGCTCCAGGGAAGGGGCTGGAGTGGGTCTCAGCTATTAGTAGTAGTGGTGGTAGCACATACTACGCAGACTCCGTGAAGGGCCGGTTCACCATCTCCAGAGACAATTCCAAGAACACGCTGTATCTGCACATGAACAGCCTGAGAGCCGAGGACACGGCCGTATATTACTGTGCGACAGAACGTATAGCAGTGGCTGGTACGCGGATGTACAACTGGTTCGACCCCTGGGGCCAGGGAACCCTGGTCACCGTCTCCTCAG	EVQLLESGGGLVQPGTSLRLSCAASGFTFSSYAMSWVRQAPGKGLEWVSAISSSGGSTYYADSVKGRFTISRDNSKNTLYLHMNSLRAEDTAVYYCATERIAVAGTRMYNWFDPWGQGTLVTVSS		VK1-39	JK1	GACATCCAGATGACCCAGTCTCCATCCTCCCTGTCTGCATCTGTAGGAGACAGAGTCACCCTCACTTGCCGGGCAAGTCAGAGCATTAGCAGCTATTTAAATTGGTATCAGCAGAAACCAGGGAAAGCCCCTAACCTCCTGATCTATGCTGCATCCAGTTTGCAAAGTGGGGTCCCATCAAGGTTCAGTGGCAGTGGATCTGGGACAGATTTCACTCTCACCATCAGCAGTCTGCAACCTGAAGATTTTGCAACTTACTACTGTCAACAGAGTTACAGTGCCCCTCCGTGGACGTTCGGCCAAGGGACCAAGGTGGAAATCAAAC	DIQMTQSPSSLSASVGDRVTLTCRASQSISSYLNWYQQKPGKAPNLLIYAASSLQSGVPSRFSGSGSGTDFTLTISSLQPEDFATYYCQQSYSAPPWTFGQGTKVEIK		14.64	6.592	9.81	251.1	233.2	2113	396.9	44.26	38.27	39.96	>10000	>10000
	C213	1.3m	VH3-21	JH4	GAGGTGCAGCTGGTGGAGTCTGGGGGAGGCCTGGTCAAGCCTGGGGGGTCCCTGAGACTCTCCTGTGCAGCCTCTGGATTCACCTTCAGTAGCTATAGCATGAACTGGGTCCGCCAGGCTCCAGGGAAGGGGCTGGAGTGGGTCTCATCCATTAGTAGTAGTAGTAGTTACATATATTACGCAGACTCAGTGAAGGGCCGATTCACCATCTCCAGAGACAACGCCAAGAACTCACTGTATCTGCAAATGAACAGCCTGAGAGCCGAGGACACGGCTGTGTATTACTGTGCGAGAGTACAAGTGGGAGCTAGGGGGTGGGTTGACTACTGGGGCCAGGGAACCCTGGTCACCGTCTCCTCAG	EVQLVESGGGLVKPGGSLRLSCAASGFTFSSYSMNWVRQAPGKGLEWVSSISSSSSYIYYADSVKGRFTISRDNAKNSLYLQMNSLRAEDTAVYYCARVQVGARGWVDYWGQGTLVTVSS		VL6-57	JL3	AATTTTATGCTGACTCAGCCCCACTCTGTGTCGGAGTCTCCGGGGAAGACGGTAACCATCTCCTGCACCCGCAGCAGTGGCAGCATTGCCAGCAACTATGTGCAGTGGTACCAGCAGCGCCCGGGCAGTGCCCCCACCACTGTGATCTATGAGGATAATGAAAGACCCTCTGGGGTCCCTGATCGGTTCTCTGGCTCCATCGACAGCTCCTCCAACTCTGCCTCCCTCACCATCTCTGGACTGAAGACTGAGGACGAGGCTGACTACTACTGTCAGTCTTATGATAGAATCAATTGGGTGTTCGGCGGAGGGACCAAGCTGACCGTCCTAG	NFMLTQPHSVSESPGKTVTISCTRSSGSIASNYVQWYQQRPGSAPTTVIYEDNERPSGVPDRFSGSIDSSSNSASLTISGLKTEDEADYYCQSYDRINWVFGGGTKLTVL		2.022	1.59	1.866	1.314	1.786	1.61	1.538	1.415	1.168	1.376	2128.97	>10000
	C217	1.3m	VH3-21	JH4	GAGGTGCAGCTGGTGGAGTCTGGGGGAGGCCTGGTCAAGCCTGGGGGGTCCCTGAGACTCTCCTGTGCAGCCTCTGGATTCACCTTCAGTAGCTATAGTATGAACTGGGTCCGCCAGGCTCCAGGGAAGGGGCTGGAGTGGGTCTCATTCATTAGTAGTAGGAGTAGTTACATATACTACGCAGACTCAGTGAAGGGCCGATTCACCATCTCCAGAGACAACGCCAAGAACTCACTGTATCTGCAAATGAACAGCCTGAGAGCCGAGGACACGGCTGTGTATTACTGTGCGAGAGTACAAGTGGGAGCTAGGGGGTGGGTTGACTACTGGGGCCAGGGAACCCTGGTCACCGTCTCCTCAG	EVQLVESGGGLVKPGGSLRLSCAASGFTFSSYSMNWVRQAPGKGLEWVSFISSRSSYIYYADSVKGRFTISRDNAKNSLYLQMNSLRAEDTAVYYCARVQVGARGWVDYWGQGTLVTVSS		VL6-57	JL3	AATTTTATGCTGACTCAGCCCCACTCTGTGTCGGAGTCTCCGGGGAAGACGGTAACCATCTCCTGCACCCGCAGCAGTGGCAGCATTGCCAGCAACTATGTGCAGTGGTACCAGCAGCGCCCGGGCAGTGCCCCCACCACTGTGATCTATGAGGATAACCAAAGACCCTCTGGGGTCCCTGATCGGTTCTCTGGCTCCATCGACAGCTCCTCCAACTCTGCCTCCCTCACCATCTCTGGACTGAAGACTGAGGACGAGGCTGACTACTACTGTCAGTCTTATGATAGCATCAATTGGGTGTTCGGCGGAGGGACCAAGCTGACCGTCCTAG	NFMLTQPHSVSESPGKTVTISCTRSSGSIASNYVQWYQQRPGSAPTTVIYEDNQRPSGVPDRFSGSIDSSSNSASLTISGLKTEDEADYYCQSYDSINWVFGGGTKLTVL		2.281	1.682	1.943	1.784	1.814	1.8	1.566	1.468	1.247	1.476	8055.33	>10000
COV57	C070	6.2m	VH3-30	JH4	AGGTGCAGCTGGTGGAGTCTGGGGGAGGCGTCGTCCAGCCGGGGGGGTCCCTGAGACTCTCCTGTGTAGCCTCTGGATTCGAATTCAGAGACTATGGCATGCACTGGGTCCGCCAGGCTCCAGGCAAGGGACTGCATTGGGTGGCAATTGTCCAATCTGATGGAAAGAATATCTATTATGCAGACTCCGTGAAGGGCCGATTCACCATCTCCAGAGACAATTCCAAGAGAAGCCAGTATCTGCAAATGAACAGCCTGAGACCTGAGGACACGGCTGTCTATTATTGTGCGAAAGAGAATTACCGGGGGACCGGCTACTTAGAATCTTGGGGCCAGGGAACCCTGGTCACCGTCTCCTCAG	VQLVESGGGVVQPGGSLRLSCVASGFEFRDYGMHWVRQAPGKGLHWVAIVQSDGKNIYYADSVKGRFTISRDNSKRSQYLQMNSLRPEDTAVYYCAKENYRGTGYLESWGQGTLVTVSS		VK1-5	JK2	GACATCCAGATGACCCAGTCTCCCTCCACCCTGGCTGCCTCTGTAGGAGACACAGTCACCATCACTTGCCGGGCCAGTTACGATGTTAAAAAGTGGGTGGCCTGGTATCAGCAGAAACCAGGAAAAGTCCCTAAGCTCCTGATCTATAAGGCGTCTACTTTAGAAGTTGGGGTCCCACTGAGATTCAGCGGCTCTGGATCTGGGACTGAATTCACTCTCACCATCAATGGCCTGCAGCCTGATGATTTCGCAACTTATTACTGCCAACACTTTCATAGTTATCCGTACTCTTTTGGCCAGGGGACCAAGCTGGAGATCAAAC	DIQMTQSPSTLAASVGDTVTITCRASYDVKKWVAWYQQKPGKVPKLLIYKASTLEVGVPLRFSGSGSGTEFTLTINGLQPDDFATYYCQHFHSYPYSFGQGTKLEIK		>10000	n.d.	n.d.	n.d.	n.d.	n.d.	n.d.	n.d.	n.d.	n.d.	>10000	>10000
	C073	6.2m	VH4-39	JH4	CAGCTGCAGCTGCAGGAGTCGGGCCCAGGACTGGTGAAGCCTTCGGAGACCCTGTCCCTCACCTGCACTGTCTCTGGTGCCTCCATCCCCAGTAGTACTTCCTACTGGGGCTGGATCCGCCAGCCCCCAGGGAAGGGACTAGAGTGGATTGGGAGTATCTATTATACTGGGAGCACCTACTACAACCCGTCCCTCAAGAGTCGAGTCACCATATCCGTAGACACGTCCAAGAACCACTTCTCCCTGATACTGAGCTCTGTGACCGCCGCAGACACGGCTGTGTATTACTGTGCGAGACGTAGTATAACACTGGCTGGTAGAGATTGTCTTGACTTCTGGGGCCAGGGAACCCTGGTCACCGTCTCCTCAG	QLQLQESGPGLVKPSETLSLTCTVSGASIPSSTSYWGWIRQPPGKGLEWIGSIYYTGSTYYNPSLKSRVTISVDTSKNHFSLILSSVTAADTAVYYCARRSITLAGRDCLDFWGQGTLVTVSS		VK1-39	JK3	GACATCCAGTTGACCCAGTCTCCATCCTCCCTGTCTGCATCTGTAGGAGACAGACTCACCATCACTTGCCGGGCAAGTCAGAGTATTACCACCTCTTTAAATTGGTATCAACAGAAACCAGGGAAAGCCCCTAAGCTCCTGATCTATGCTGCATCCAGTTTGCAAAGTGGGGTCCCATCTAGGTTCAGTGGCAGTGGATCTGGGACAGATTTCACTCTCGCCATCAGCAGTCTCCAACCTGAAGATTTTGCAACTTACTACTGTCAACAGAGTTACATTCCCTTGCTCACTTTTGGCGGAGGGACCAAAGTGGATATCAAAC	DIQLTQSPSSLSASVGDRLTITCRASQSITTSLNWYQQKPGKAPKLLIYAASSLQSGVPSRFSGSGSGTDFTLAISSLQPEDFATYYCQQSYIPLLTFGGGTKVDIK		20.61	n.d.	n.d.	n.d.	n.d.	n.d.	n.d.	n.d.	n.d.	n.d.	>10000	>10000
	C075	6.2m	VH6-1	JH6	GTGCAGCTGTTGGAGTCGGGTCCAGGACTGTTGAAGCCCTCGCAGACCCTCTCACTCACCTGTGCCATCTCCGGGGACAGTGTCTCTAGCAGCGGTGCTGCTTGGAACTGGATCAGGCAGTCCCCATCGAGAGGCCTTGAGTGGCTGGGAAGGACATACTACAAGTCCAAGTGGTATAATGATTATGCAGTATCTGTGAAAAGTCGAATAACCATCAACCCAGACACATCCAAGAACCAGTTCTCCCTGCAACTGAACTCTGTTACTCCCGAGGACACGGCTGTGTATTACTGTGCAAGAATGTGGGTAGTAGCAGGTACTACTGACGATTACTACTACCACTACGGTATGGACGTCTGGGGCCAAGGGACCACGGTCACCGTCTCCTCAG	VQLLESGPGLLKPSQTLSLTCAISGDSVSSSGAAWNWIRQSPSRGLEWLGRTYYKSKWYNDYAVSVKSRITINPDTSKNQFSLQLNSVTPEDTAVYYCARMWVVAGTTDDYYYHYGMDVWGQGTTVTVSS		VK1D-12	JK3	CATCCGGATGACCCAGTCTCCGTCTTCTGTGTCTGCATCTGTGGGAGACAGAGTCACCATAACTTGTCGGGCGAGTCAGGGTATTAGCAACTGGTTAGCCTGGTATCAACAGAAACCAGGGAAAGCCCCTAAGGTCCTACTCTATGCTGCATCCAGTTTGCGAAGTGGGGTCCCATCAAGGTTCAGCGGCAGTGGGTCTGGGACAGATTTCACTCTCACTATCAGCAGCCTGCAGCCTGAAGATTTTGCAACTTACTATTGTCAACAGACTAACACTCTCCCGCTCAGTTTCGGCGGAGGGACCAAAGTGGATATCAAAC	IRMTQSPSSVSASVGDRVTITCRASQGISNWLAWYQQKPGKAPKVLLYAASSLRSGVPSRFSGSGSGTDFTLTISSLQPEDFATYYCQQTNTLPLSFGGGTKVDIK		>10000	n.d.	n.d.	n.d.	n.d.	n.d.	n.d.	n.d.	n.d.	n.d.	>10000	>10000
	C077	6.2m	VH1-4	JH5	CAGGTGCAGCTGGTGCAGTCTGGGGCTGAGGTGAAGAAGCCTGGGGCCTCAGTGAAGGTTTCCTGCAAGGCTTCTGGATACACCTTCACTAGCTATGCTATGCATTGGGTGCGCCAGGCCCCCGGACAAAGGCTTGAGTGGATGGGATGGATCAACACTGACAATGGTAACACAAAATATTCACAGAAGTTCCAGGGCAGAGTCACCATTACCAGGGACACATCCGCGAGCACAGCCTACATGGAGCTGAGCAGCCTGAGATCTGAAGACACGGCTGTGTATTACTGTGCGAGAGAGGGAGCACTTACAAACTGGTTCGACCCCTGGGGCCAGGGAACCCTGGTCACCGTCTCCTCAG	QVQLVQSGAEVKKPGASVKVSCKASGYTFTSYAMHWVRQAPGQRLEWMGWINTDNGNTKYSQKFQGRVTITRDTSASTAYMELSSLRSEDTAVYYCAREGALTNWFDPWGQGTLVTVSS		VL3-21	JL2	TCCTATGAGCTGACTCAGCCACCCTCGGTGTCAGTGGCCCCAGGACAGACGGCCAGGATTCCCTGTGGGGGAAACAACATTGGAAGTAAAAGTGTGCACTGGTACCAGCAGAAGCCAGGCCAGGCCCCTGTGCTGGTCGTCTATGATGATAGCGACCGGCCCTCAGGGATCCCTGAGCGATTCTCTGGCTCCAACTCTGGGAACACGGCCACCCTGACCATCAGCAGGGTCGAAGCCGGGGATGAGGCCGACTATTACTGTCAGGTGTGGGATAGTAGTAGTGATCTCCATGTGGTATTCGGCGGAGGGACCAAGCTGACCGTCCTAG			45.95	n.d.	n.d.	n.d.	n.d.	n.d.	n.d.	n.d.	n.d.	n.d.	>10000	>10000
	C078	6.2m	VH4-34	JH4	CAGGTGCAGCTACAGCAGTGGGGCGCAGGACTGTTGAAGCCTTCGGAGACCCTGTCCCTCACCTGCGCTGTCTATGGTGGGTCCCTCAGTGCTTACTACTGGAGCTGGATCCGCCAGCCCCCAGGGAAGGGGCTGGAGTGGATTGGGGAAATCAATAATGGTGGAACAACCAACTACAACCCGTCCCTCAAGAGTCGAGTCACCTTATCAGTAGACACGTCCAAGAATCAATTCTCCCTGGAGCTGAGCTCTGTGACCGCCGCGGACACGGCTATATATTACTGTGCGAGACCGGGCATAACTGCAACTACGGGCTTTGACTTCTGGGGCCAGGGATCCCTGGTCACCGTCTCCTCAG	QVQLQQWGAGLLKPSETLSLTCAVYGGSLSAYYWSWIRQPPGKGLEWIGEINNGGTTNYNPSLKSRVTLSVDTSKNQFSLELSSVTAADTAIYYCARPGITATTGFDFWGQGSLVTVSS		VK1-39	JK4	GACATCCAGTTGACCCAGTCTCCATCCTCCCTGTCTGCATCTGTAGGAGACAGAGTCACCATCACTTGCCGGGCAAGTCAGAGCATTAGCACGTATTTAAATTGGTATCACCAAAAACCAGGGAAAGCCCCTAAGGTCCTGATCTATGCTGCATCCAGTTTGCAAGGTGGGGTCCCATCAACTTTCAGTGGCAGTGGATCTGGGACAGATTTCACTCTCACAATCAGCAGTCTGCAACCTGACGATTTTGGAACCTACTACTGTCAACAGAGTTACAATATGCCGCTCACTTTCGGCGGAGGGACCAAGGTGGAAATCAAAC	SYELTQPPSVSVAPGQTARIPCGGNNIGSKSVHWYQQKPGQAPVLVVYDDSDRPSGIPERFSGSNSGNTATLTISRVEAGDEADYYCQVWDSSSDLHVVFGGGTKLTVL		3859	n.d.	n.d.	n.d.	n.d.	n.d.	n.d.	n.d.	n.d.	n.d.	>10000	>10000
	C079	6.2m	VH3-30	JH4	AGGTGCAGCTGGTGGAGTCTGGGGGAGGCGTGGTCCAGCCTGGGGGGTCCCTGAGACTCTCCTGTGCAGCGTCTCTATTCAGTTTCAGTGACTATGGCATGCACTGGGTCCGCCAGGCTCCAGGCAAGGGGCTGGAGTGGGTGGCATTTATTTGGTATGATGGAACTAAAAAAGACTATACACATTCTGTGAAGGGCCGGTTCACCGTCTCCAGAGACAATTCTAAGAACACGCTGTATCTGCAAATGAACAGCCTGAGAGCAGAGGACACGGCTATGTATTACTGTGCGAAGGCCCGGGGCTTCCAGCACTACTTTGACCAATGGGGCCAGGGAACCCTGGTCACCGTCTCCTCAG	VQLVESGGGVVQPGGSLRLSCAASLFSFSDYGMHWVRQAPGKGLEWVAFIWYDGTKKDYTHSVKGRFTVSRDNSKNTLYLQMNSLRAEDTAMYYCAKARGFQHYFDQWGQGTLVTVSS		VL2-23	JL2	CAGTCTGCCCTGACTCAGCCTGCCTCCGTGTCTGGGTCTCCTGGACAGTCGATCACCATCTCCTGCACTGGAACCAGCAGTGATGTTGGGAGTTATAACCTTGTCTCCTGGTACCAACAACACCCAGGCAAAGCCCCCAAACTCCTGATTTATGAGGTCGGTAAGCGGCCCTCAGGGGTTTCTAATCGCTTCTCTGGCTCCAAGTCTGGCAACACGGCCTCCCTGACAATCTCTGGGCTCCAGGCTGAGGACGAGGCTGATTATTATTGCTGCTCATATGCAGGTAGTGGCACTCTCGGTGTGGTATTCGGCGGAGGGACCAAGCTGACCGTCCTAG	QSALTQPASVSGSPGQSITISCTGTSSDVGSYNLVSWYQQHPGKAPKLLIYEVGKRPSGVSNRFSGSKSGNTASLTISGLQAEDEADYYCCSYAGSGTLGVVFGGGTKLTVL		>10000	n.d.	n.d.	n.d.	n.d.	n.d.	n.d.	n.d.	n.d.	n.d.	>10000	>10000
	C080	6.2m	VH5-51	JH2	GAGGTGCAGCTGGTGCAGTCTGGAGCAGAGGTGAAAAAGCCCGGGGAGTCTCTGAACATCTCCTGTAAGGCTTCTGGATACAGCTTTACCATCTACTGGATCGCCTGGGTGCGCCAGTTGCCCGGTAAAGGCCTGGAGTGGATGGGGATCATCTATCCTGGTGACTCTGATACGAGATATAGTCCGTCCTTTCAAGGCCAGGTCACCATCTCAGCCGACAAGTCCATCAGCACCGCCTACCTGCAGTGGCGCAGCCTGAAGGCCTCGGACAGCGCCGTGTATTACTGTGCGAGAGGGGTAGCAGTGGACTGGTACTTCGATCTCTGGGGCCGTGGCACCCTGGTCACCGTCTCCTCAG	EVQLVQSGAEVKKPGESLNISCKASGYSFTIYWIAWVRQLPGKGLEWMGIIYPGDSDTRYSPSFQGQVTISADKSISTAYLQWRSLKASDSAVYYCARGVAVDWYFDLWGRGTLVTVSS		VL1-40	JL1	CAGTCTGTGCTGACTCAGCCGCCCTCAGTGTCTGGGGCCCCAGGACAGAGGGTCACCATCTCCTGCGCTGGGAGCAGCTCCAACATCGGGGCAGGTTTTGATGTATACTGGTACCAGCAGCTTCCAGGAACAGCCCCCAAACTCCTCATCTATGGTAATAACAATCGGCCCTCAGGGGTCCCTGACCGATTCTCTGGCTCCAAGTCTGGCACGTCAGCCTCCCTGGCCATCACTGGGCTCCAGGCTGAGGATGAGGCTGATTATTACTGCCAGTCCTCTGGCAGCGTCCTGAGTGACCTTTATGTCTTCGGAACTGGGACCAAGGTCACCGTCCTAG	QSVLTQPPSVSGAPGQRVTISCAGSSSNIGAGFDVYWYQQLPGTAPKLLIYGNNNRPSGVPDRFSGSKSGTSASLAITGLQAEDEADYYCQSSGSVLSDLYVFGTGTKVTVL		1.969	1.736	2.657	1.998	2.268	2.283	2.603	2.273	2.215	2.439	44.2833	1888.45
	C091	1.3m	VH1-69	JH6	CAGGTGCAGCTGGTGCAGTCTGGGGCTGAGGTGAAGAAGCCTGGGTCCTCGGTGAAGGTCTCCTGCAAGGCTTCTGGAGGCACCTTCAGCAGCTATACTATCAGCTGGGTGCGACAGGCCCCTGGACAAGGGCTTGAGTGGATGGGAAGGATCATCCCTATCCTTGGTATAGCAAACTACGCACAGAAGTTCCAGGGCAGAGTCACGATTACCGCGGACAAATCCACGAGCACAGCCTACATGGAGCTGAGCAGCCTGAGATCTGAGGACACGGCCGTGTATTACTGTGCGAGAGATAGTGGATATAGTGGCTACGGAAGCACATACTACATGGACGTCTGGGGCAAAGGGACCACGGTCACCGTCTCCTCAG	QVQLVQSGAEVKKPGSSVKVSCKASGGTFSSYTISWVRQAPGQGLEWMGRIIPILGIANYAQKFQGRVTITADKSTSTAYMELSSLRSEDTAVYYCARDSGYSGYGSTYYMDVWGKGTTVTVSS		VL1-40	JL1	CAGTCTGTGCTGACTCAGCCGCCCTCAGTGTCTGGGGCCCCAGGGCAGAGGGTCACCATCTCCTGCACTGGGAGCAGCTCCAACATCGGGGCAGGTTATGATGTACACTGGTACCAGCAGCTTCCAGGAACAGCCCCCAAACTCCTCATCTATGGTAACAGCAATCGGCCCTCAGGGGTCCCTGACCGATTCTCTGGCTCCAAGTCTGGCACCTCAGCCTCCCTGGCCATCACTGGGCTCCAGGCTGAGGATGAGGCTGATTATTACTGCCAGTCCTATGACAGCAGCCTGAGTGGTTCTGTCTTCGGAACTGTGACCAAGGTCACCGTCCTAG	QSVLTQPPSVSGAPGQRVTISCTGSSSNIGAGYDVHWYQQLPGTAPKLLIYGNSNRPSGVPDRFSGSKSGTSASLAITGLQAEDEADYYCQSYDSSLSGSVFGTVTKVTVL		89.45	3.533	8.09	3.762	3.038	23.38	4.281	3.467	117.9	25.24	56.6746	630.921
	C092	6.2m	VH1-69	JH6	CAGGTGCAGCTGGTGCAGTCTGGGGCTGAGGTGAAGAAGCCTGGGTCCTCGGTGAAGGTCTCCTGCAAGGCTTCTGGAGGCAGCTTCACCAACCATTTTATCAGTTGGGTGCGACAGGCCCCTGGACAAGGGCTTGAGTGGATGGGTAGGATCATCCCTATCCTTGGTACAGCAAACTACGCACAGAACTTCCAAGGCAGAGTCATGATGACCGCGGACAAATCCACGAGCACAGCCTACATGGAGCTAAGTAGCCTGAGATCTGAGGACACGGCCGTGTATTACTGTGCGAGAGATAGTGGATATAGTGGGTACGGAAGTACATACTATATGGACGTCTGGGGCAAAGGGACCACGGTCACCGTCTCCTCAG	QVQLVQSGAEVKKPGSSVKVSCKASGGSFTNHFISWVRQAPGQGLEWMGRIIPILGTANYAQNFQGRVMMTADKSTSTAYMELSSLRSEDTAVYYCARDSGYSGYGSTYYMDVWGKGTTVTVSS		VL1-40	JL1	CAGTCTGTGCTGACTCAGCCGCCCTCAGTGTCTGGGGCCCCAGGGCAGAGGGTCACCATCTCCTGCACTGGGAGCAACTCCAACATCGGGGCAGGTTATGATGTACACTGGTACCAGCAACTTCCAGGAGCAGCCCCCAAACTCCTCATCTATGGTAACAACAATCGGCCCTCAGGGGTCCCTGACCGATTCTCTGGCTCCAAGTCTGACACCTCAGCCTCCCTGGCCATCACTGGGCTCCAGGTTGAGGATGAGGCTGATTATTACTGTCAGTCCTATGACAGCAGTCTGAGTGATTCTGTCTTCGGAAGTGGGACCAAGGTCACCGTCCTAG	QSVLTQPPSVSGAPGQRVTISCTGSNSNIGAGYDVHWYQQLPGAAPKLLIYGNNNRPSGVPDRFSGSKSDTSASLAITGLQVEDEADYYCQSYDSSLSDSVFGSGTKVTVL		7.066	2.776	3.135	3.137	2.405	3.22	2.923	2.7	3.088	3.784	227.251	>10000
	C093	1.3m	VH4-59	JH5	CAGGTGCAGCTGCAGGAGTCGGGCCCAGGACTGGTGAAGCCTTCGGAGACCCTGTCCCTCACCTGCACTGTCTCTGGTGGCTCCATCAGTAGTTACTACTGGAGCTGGATCCGGCAGCCCCCAGGGAAGGGACTGGAGTGGATTGGGTATATCCATTACAGTGGGAGCACCAACTACAACCCCTCCCTCAAGAGTCGAGTCACCATATCAGTAGACACGTCCAAGAACCAGTTCTCCCTGAAGCTGAGCTCTGTGACCGCCGCAGACACGGCCGTGTATTACTGTGCGAGACATTACGATATTTTGACTGCCCTGAGCTGGTTCGACCCCTGGGGCCAAGGAACCCTGGTCACCGTCTCCTCAG	QVQLQESGPGLVKPSETLSLTCTVSGGSISSYYWSWIRQPPGKGLEWIGYIHYSGSTNYNPSLKSRVTISVDTSKNQFSLKLSSVTAADTAVYYCARHYDILTALSWFDPWGQGTLVTVSS		VL1-51	Jl3	CAGTCTGTGCTGACTCAGCCGCCCTCAGTGTCTGCGGCCCCAGGACAGAAGGTCACCATCTCCTGCTCTGGAAGCAGCTCCAACATTGGGAATAATTATGTATCCTGGTACCAGCAGCTCCCAGGAACAGCCCCCAAACTCCTCATTTATGACAATAATAAGCGACCCTCAGGGATTCCTGACCGATTCTCTGGCTCCAAGTCTGGCACGTCAGCCACCCTGGGCATCACCGGACTCCAGACTGGGGACGAGGCCGATTATTACTGCGGAACATGGGATAGCAGCCTGAGTGCCTATTGGGTGTTCGGCGGAGGGACCAAGCTGACCGTCCTAG	QSVLTQPPSVSAAPGQKVTISCSGSSSNIGNNYVSWYQQLPGTAPKLLIYDNNKRPSGIPDRFSGSKSGTSATLGITGLQTGDEADYYCGTWDSSLSAYWVFGGGTKLTVL		1.02	0.8772	37.05	235.6	2.918	3.201	2.351	2.418	3.192	2.505	22.8012	81.34
	C094	6.2m	VH4-59	JH5	CAGGTGCAGCTGCAGGAGTCGGGCCCAGGACTGGTGAAGCCTTCGGAGACCCTGTCCCTCACCTGCAATGTCTCTGGTGTCTCCATCAGTACTGACTACTGGAGCTGGATCCGGCAGCCCCCAGGGAAGGGACTGGAGTGGATTGGATATATCTATTACAGTGGGAACACCAAGGACTACAACCCCTCCCTCAAGAGTCGAGTCACCATATCAGTAGACACGTCCAAGAACCAGTTCTCCCTGATGCTGAGCTCTGTGACCGCCGCAGACACGGCCGTATATTACTGTGCGAGACATTACGATATTTTGACTTCCCTGAGTTGGTTCGATCCCTGGGGCCAGGGAACCCTGGTCACCGTCTCCTCAG	QVQLQESGPGLVKPSETLSLTCNVSGVSISTDYWSWIRQPPGKGLEWIGYIYYSGNTKDYNPSLKSRVTISVDTSKNQFSLMLSSVTAADTAVYYCARHYDILTSLSWFDPWGQGTLVTVSS		VL1-51	JL3	CAGTCTGTGCTGACTCAGCCGCCCTCAGTGTCTGCGGCCCCAGGACAGAAGGTCACCATCTCCTGCTCTATAACCAACTCCAACCTTGGGAATATTTATGTATCCTGGTACCAGCAGCTCCCAGGAACAGCCCCCAAACTCCTCATTTATGGCAATAATAAGCGACCCTCAGGGATTCCTGACCGATTCTCTGGCTCCAAGTCTGGCACGTCGGCCACCCTGGGCATCACCGGACTCCAGACTGGGGACGAGGCCCATTATTACTGCGGAACCTGGGATAGTAGCCTGAGTGCCAATTGGGTGTTCGGCGGAGGGACCAAGCTGACCGTCCTAG	QSVLTQPPSVSAAPGQKVTISCSITNSNLGNIYVSWYQQLPGTAPKLLIYGNNKRPSGIPDRFSGSKSGTSATLGITGLQTGDEAHYYCGTWDSSLSANWVFGGGTKLTVL		1.67	1.557	244.9	931.6	2.827	2.458	1.971	2.084	2.291	2.441	470.541	1472.13
	C034	1.3m	VH1-69	JH6	CAGGTGCAGCTGGTGCAGTCTGGGGCTGAGGTGAAGAAGCCTGGGTCCTCGGTGAAGGTCTCCTGCAAGGCTTCTGGAGGCACCTTCAGCAGCTATGCTATCAGCTGGGTGCGACAGGCCCCTGGACAAGGGCTTGAGTGGATGGGAAGGATCATCCCTATCCTTGGTATAGCAAACTACGCACAGAAGTTCCAGGGCAGAGTCACGATTACCGCGGACAAATCCACGAGCACAGCCTACATGGAGCTGAGCAGCCTGAGATCTGAGGACACGGCCGTGTATTACTGTGCGAGAGATTCCGAGTATAGCAGCAGCTGGTACTCACGGGGCTACTACGGTATGGACGTCTGGGGCCAAGGGACCACGGTCACCGTCTCCTCAG	QVQLVQSGAEVKKPGSSVKVSCKASGGTFSSYAISWVRQAPGQGLEWMGRIIPILGIANYAQKFQGRVTITADKSTSTAYMELSSLRSEDTAVYYCARDSEYSSSWYSRGYYGMDVWGQGTTVTVSS		VK2-28	JK4	GATATTGTGATGACTCAGTCTCCACTCTCCCTGCCCGTCACCCCTGGAGAGCCGGCCTCCATCTCCTGCAGGTCTAGTCAGAGCCTCCTGCATAGTAATGGATACAACTATTTGGATTGGTACCTGCAGAAGCCAGGGCAGTCTCCACAGCTCCTGATCTATTTGGGTTCTAATCGGGCCTCCGGGGTCCCTGACAGGTTCAGTGGCAGTGGATCAGGCACAGATTTTACACTGAAAATCAGCAGAGTGGAGGCTGAGGATGTTGGGGTTTATTACTGCATGCAAGCTCTACAAACTCCTCCCACTTTCGGCGGAGGGACCAAGGTGGAAATCAAAC	DIVMTQSPLSLPVTPGEPASISCRSSQSLLHSNGYNYLDWYLQKPGQSPQLLIYLGSNRASGVPDRFSGSGSGTDFTLKISRVEAEDVGVYYCMQALQTPPTFGGGTKVEIK		15.67	n.d.	n.d.	n.d.	n.d.	n.d.	n.d.	n.d.	n.d.	n.d.	1689.38	>10000
	C035	1.3m	VH3-7	JH4	GAGGTGCAGCTGGTGGAGTCGGGGGGAGGCTTGGTCCAGCCGGGGGGGTCCCTGCGACTCTCCTGTGCAGCCTCTGGATTCATTTTTAGTAGTTATTGGATGACATGGGTCCGCCAGGCTCCAGGGAAGGGGCTGGAGTGGGTGGCCAGCATAAAGTATAATGGAAATGAGAGGAACTATGTGGACTCTGTGAAGGGCCGATTCACCATCTCCAGAGACAACGCCAGGAATTCATTGTTTTTGCAACTCAACAACCTGGGAGCCGAAGACACGGCTGTCTATTACTGCGCGAGACAGCCCGAGAGTACTATCTGGTACTACTTTGATTACTGGGGCCAGGGAACCCTGGTCACCGTCTCCTCAG	EVQLVESGGGLVQPGGSLRLSCAASGFIFSSYWMTWVRQAPGKGLEWVASIKYNGNERNYVDSVKGRFTISRDNARNSLFLQLNNLGAEDTAVYYCARQPESTIWYYFDYWGQGTLVTVSS		VL3-25	JL2	TCCTATGAGCTGACACAGCCACCCTCGGTGTCAGTGTCCCCAGGACAGACGGCCAGGGTCACCTGCTCTGGACATGCCTTGCCAGACCAATACACTTATTGGTATCAACAGAGGCCAGGCCGGGCCCCTGTATTGGTTATATATGTAAACAATCAGAGGCCCTCAGGGATCCCTGACCGATTCTCTGCTACCACCTCAGGGACAACGGTCACCTTGACCATCAGTGGCGTCCAGGCAGAAGACGAGGCGGACTATTACTGTCAATCAGCAGACAGTAGTGGTTCTTATGTGGTTTTCGGCGGAGGGACCAAGCTGACCGTCCTAG	SYELTQPPSVSVSPGQTARVTCSGHALPDQYTYWYQQRPGRAPVLVIYVNNQRPSGIPDRFSATTSGTTVTLTISGVQAEDEADYYCQSADSSGSYVVFGGGTKLTVL		15.16	n.d.	n.d.	n.d.	n.d.	n.d.	n.d.	n.d.	n.d.	n.d.	>10000	>10000
	C520	6.2m	VH4-34	JH3	CAGGTGCAGCTACAGCAGTGGGGCGCAGGGCTGTTGAAGCCTTCGGAGACCCTGTCCCTCACCTGCGCTGTCTTTGGTGGATCCTTCAGTGGCTACTACTGGGGCTGGATCCGCCAGCCCCCGGGGAAGGGGCTGGAGTGGATTGCGGAAATCAATCATAGTGAAAACTCCCACTACAACCCGTCCCTCAAGAGTCGAGTCACCATATCAGTAGACACCTTCAAGAACCAGTTCTCCCTGAACCTGAGCTCTGTGACCGCCGCGGACACGGCTCTCTATTATTGTGTGAGACGTCCGCGAAGATATTGTAGTGGTGATACGTGCCGAGGAGCATTTGATATCTGGGGCCAGGGGACAATGGTCACCGTCTCTTCAG	QVQLQQWGAGLLKPSETLSLTCAVFGGSFSGYYWGWIRQPPGKGLEWIAEINHSENSHYNPSLKSRVTISVDTFKNQFSLNLSSVTAADTALYYCVRRPRRYCSGDTCRGAFDIWGQGTMVTVSS		VK1-27	JK3	GACATCCAGATGACCCAGTCTCCATCCTCCCTGTCTGCATCTGTAGGAGACCGAGTCACCATCACTTGCCGGGCGAGTCAGGACATTAGCAATTTCTTAGCCTGGTATCAGCAGAAACCAGGGAAAGTTCCTAGCCTCCTGATCTATGCAGCATCCATTTTGCAGCCAGGGGTCCCATCTCGCTTCAGTGGCAGTGGATCTGGGACAGATTTCACTCTCACCATCACCAGCCTGCAGCCTGAAGATGTTGCAACTTATTACTGTCAAAAGTATAAAATTGACCCATTCACTTTCGGCCCTGGGACCAAAGTGGATATCAAAC	DIQMTQSPSSLSASVGDRVTITCRASQDISNFLAWYQQKPGKVPSLLIYAASILQPGVPSRFSGSGSGTDFTLTITSLQPEDVATYYCQKYKIDPFTFGPGTKVDIK		>10000	n.d.	n.d.	n.d.	n.d.	n.d.	n.d.	n.d.	n.d.	n.d.	>10000	>10000
	C521	6.2m	VH3-66	JH6	GAGGTGCAGCTGGTGGAGTCTGGGGGAGGCTTGGTCCGGCCTGGGGGGTCCCTGACACTCTCCTGTGTAGCCTCTGGATTCACCGTCGGTAGCAATTTCATGAGCTGGGTCCGCCAGGCTCCAGGGAAGGGGCTGGAGTGGGTCTCACTTATTTATAACAGTGGTGGCACACATTACGCAGACTCCGTGAAGGGCCGATTCACCATCTCCAGAGACAGATCCAAGAACACACTGTATCTTCAAATGAACAGCCTGAGAGCTGAGGACACGGCTATTTATTACTGTGCGAACCACGGATACTACTATTACATGGACGTCTGGGGCAAAGGGACCACGGTCACCGTCTCC	EVQLVESGGGLVRPGGSLTLSCVASGFTVGSNFMSWVRQAPGKGLEWVSLIYNSGGTHYADSVKGRFTISRDRSKNTLYLQMNSLRAEDTAIYYCANHGYYYYMDVWGKGTTVTVS		VL2-14	JK3	CAGTCTGCCCTGACTCAGCCTGCCTCCGTGTCTGGGTCTCCTGGACAGTCGATCACCATCTCCTGCACTGGAACCGGCAGTGACATTGGTGCTTATAACTATGTCTCTTGGCACCAACACCACCCAGGCAAAGCCCCCAAACTCATTATTTATGACGTCAGTAATCGGCCCTCAGGGGTTTCTAATCGCTTCTCTGGCTCCAAGTCTGGCAACACGGCCTCCCTGACCATCTCTGGGCTCCAGGCTGAGGACGAGGCTGATTATTATTGCACCTCATATACAAACACCACCACTCCCTGGGTGTTCGGCGGAGGGACCAAGGTGACCGTCCTAG	QSALTQPASVSGSPGQSITISCTGTGSDIGAYNYVSWHQHHPGKAPKLIIYDVSNRPSGVSNRFSGSKSGNTASLTISGLQAEDEADYYCTSYTNTTTPWVFGGGTKVTVL		6.9	n.d.	n.d.	n.d.	n.d.	n.d.	n.d.	n.d.	n.d.	n.d.	11.3042	61.2166
	C522	6.2m	VH3-53	JH4	GAGGTGCAGCTGGTGGAGTCTGGAGGAGGCTTGATCCAGCCGGGGGGGTCCCTGAGACTCTCCTGTGCAGCCTCTGAGTTCATCGTCAGTCGCAACTACATGAGCTGGGTCCGCCAGGCTCCAGGGAAGGGGCTGGAGTGGGTCTCAGTTATTTATAGCGGTGGTAGCACATTCTACGCAGACTCCGTGAAGGGCCGATTCACCATCTCCAGAGACGAATCCAAGAACACGCTGTATCTTCAAATGAACAGCCTGAGAGCCGAGGACACGGCCATTTATTATTGTGCGAGAGACCGGGGCGGGGGGATACTTGACTACTGGGGCCAGGGAACCCTGGTCACCGTCTCCTC	EVQLVESGGGLIQPGGSLRLSCAASEFIVSRNYMSWVRQAPGKGLEWVSVIYSGGSTFYADSVKGRFTISRDESKNTLYLQMNSLRAEDTAIYYCARDRGGGILDYWGQGTLVTVS		VK1-33	JK2	GACATCCAGATGACCCAGTCTCCATCCTCCCTGTCTGCTTCTGTGGGAGACAGAGTCACCATCACTTGCCAGGCGAGTCAAGACATTAACATCTTTTTAAATTGGTATCAGCAGAAACCAGGGAAAGCCCCTAAACTCCTGATCTACGATGCATCCAGTTTGGAAACAGGGGTCCCTTCAAGGTTCAGTGGAAGTGGATCTGGGACAGACTTCACTTTCACCATCAGCAGCCTGCAGCCTGAGGATTTTGCAACATATTACTGTCAGCAGTATGGTAATCTCCCTAAGTACACTTTTGGCCAGGGGACCAAGCTGGAGATCAAAC	DIQMTQSPSSLSASVGDRVTITCQASQDINIFLNWYQQKPGKAPKLLIYDASSLETGVPSRFSGSGSGTDFTFTISSLQPEDFATYYCQQYGNLPKYTFGQGTKLEIK		0.93	n.d.	n.d.	n.d.	n.d.	n.d.	n.d.	n.d.	n.d.	n.d.	20.6443	73.9678
COV21	C095	6.2m	VH3-30	JH4	AGGTGCAGCTGGTGGAGGCCGGGGGAGGCGTGGTCCAGCCTGGGAGGTCCCTGAGACTCTCATGTGCAGCCTCTGGACTCGCCTTCAGTATCTATGGCATGCACTGGGTCCGCCAGGCTCCAGGCAAGGGGCTGGAGTGGGTGGCAATTGTAGCACAGGATGGAAGTAAGAAATACTATGCAGACTCCGTGAAGGGCCGATTCACCATCTCCAGAGACAATTCCAAGAACACCCTATATCTGGAAATGAACAGCCTGAGAACTGAGGACACGGCTGTGTATTACTGTGTAAAAGAGGGGAGACCATCTGATACTGTAGTGGTGGTGGCCTTTGACTACTGGGGCCAGGGAAGCCTGGTCACCGTCTCCTCAG	VQLVEAGGGVVQPGRSLRLSCAASGLAFSIYGMHWVRQAPGKGLEWVAIVAQDGSKKYYADSVKGRFTISRDNSKNTLYLEMNSLRTEDTAVYYCVKEGRPSDTVVVVAFDYWGQGSLVTVSS		VK1-39	JK1	GACATCCAGTTGACCCAGTCTCCATCCTCCCTGTCTGCATCTGTAGGAGACAGAGTCACCATCACTTGCCGGGCAAGTCAGAGCATTAGCAACTATTTAAATTGGTATCAGCAAAAACCAGGGAAAGCCCCTAAAGTCATCATCTATGCTGCATCCAGTTTGCAGAGTGGGGTCCCATCAAGGTTCAGTGGCAGTGGATCTGGGACAGATTTCACTCTCACCATCAGCAGTCTGCAACCTGAAGATTTTGCAACTTACTACTGTCAACAGAGTCACAGTATCCCTCGGACGTTCGGCCAAGGGACCAAGGTGGAAATCAAAC	DIQLTQSPSSLSASVGDRVTITCRASQSISNYLNWYQQKPGKAPKVIIYAASSLQSGVPSRFSGSGSGTDFTLTISSLQPEDFATYYCQQSHSIPRTFGQGTKVEIK		1.097	1.045	>10000	1.53	1.442	1.059	1.08	1.152	0.9391	1.069	11.2812	52.5618
	C096	6.2m	VH3-15	JH4	GAGGTGCAGCTGGTGGAGTCTGGGGGAGGCTTGGTCAAGCCGGGGGGGTCCCTTAGACTCTCCTGTGTAGCCTCTGGATTCACTTTCAGAAACGCCTGGATGAACTGGGTCCGCCAGGCTCCAGGGAAGGGGCTGGAGTGGGTTGGCCGTATTAAAGCCAATTCTGATGGTGGGACAATAGACTACGCTGAACCCGTGCAAGGCAGATTCACCATCTCAAGAGAAGATTCAAGAAACTCACTGTATCTGCAAATGAATAGCCTGAAAACCGAGGACACAGCCGTGTATTACTGTACCACAGGCCCTCAGTATGATGATTTTGGTCACTCGTACATTGTTGACTCCTGGGGCCCGGGAACCCTGGTCACCGTCTCCTCAG	EVQLVESGGGLVKPGGSLRLSCVASGFTFRNAWMNWVRQAPGKGLEWVGRIKANSDGGTIDYAEPVQGRFTISREDSRNSLYLQMNSLKTEDTAVYYCTTGPQYDDFGHSYIVDSWGPGTLVTVSS		VK2-28	JK4	GATATTGTGATGACTCAGTCTCCACTCTCCCTGCCCGTCACCCTTGGAGAGCCGGCCTCCATCTCCTGCAGGTCTAGTCAGAGCCTCCTGCATAGTAATGGATTCCACTTTTTGGAGTGGTACCTGCAGAAGCCAGGGCAGTCTCCACAGCTCCTGATCTATGTGGGTTCTAATCGGGCCTCCGGGGTCCCTGACAGGTTCAGTGGCAGTGGATCAGGCACAGATTTTACATTGAAAATCAGCAGAGTGGAGGCTGAGGATGTTGGGGTTTATTACTGCATGCAAACTCTACAGACTCCCCTCACTTTCGGCGGAGGGACCAAGGTGGAAATCAAAC	DIVMTQSPLSLPVTLGEPASISCRSSQSLLHSNGFHFLEWYLQKPGQSPQLLIYVGSNRASGVPDRFSGSGSGTDFTLKISRVEAEDVGVYYCMQTLQTPLTFGGGTKVEIK		5.18	n.d.	n.d.	n.d.	n.d.	n.d.	n.d.	n.d.	n.d.	n.d.	80.202	349.007
	C097	6.2m	VH4-31	JH4	CAGGTGCAGCTGCAGGAGTCGGGCCCAGGACTGGTGAAGCCTTCACAGACCCTGTCCCTCACCTGCACTGTCTCTGGTGGCTCAATCAGCAGTGGTCCTTACTACTGGAGTTGGATCCGCCAGCACCCAGGGAAGGGCCTGGAGTGGATTGGGTACATCTATTACAGTGGGAGCACCTACTACAACCCGTCCCTCAAGAGTCGAGTTACCATATCAGTGGACACGTCTAAGAAGCAGTTCTCCCTGAACCTGAACTCTGTGACTGCCGCGGACACGGCCGTGTATTACTGTGCGAGAGTTTGGCAATACTATGATAGTACTGGATCCTTTGACTACTGGGGCCAGGGAACCCTGGTCACCGTCTCCTCAG	QVQLQESGPGLVKPSQTLSLTCTVSGGSISSGPYYWSWIRQHPGKGLEWIGYIYYSGSTYYNPSLKSRVTISVDTSKKQFSLNLNSVTAADTAVYYCARVWQYYDSTGSFDYWGQGTLVTVSS		VK2-28	JK3	GATATTGTGATGACTCAGTCTCCACTCTCCCTGCCCGTCACCCCTGGAGAGCCGGCCTCCATCTCCTGCAGGTCTAGTCGGGGCCTCCTCCATAGTAATGGATACAACTATTTGGATTGGTACCTGCAGAAGCCAGGGCAGTCTCCACAGCTCCTGATCTATTTGGGTTCTAATCGGGCCTCCGGGGTCCCTGACAGGTTCAGCGGCAGTGGGTCAGTCACAGATTTTACACTGAACATCAGCAGAGTGGAGGCTGAGGATGTTGGGGTTTATTACTGCATGCAAGCTCTACAAACTCCATTCACTTTCGGCCCTGGGACCAAAGTGGATATCAAAC	DIVMTQSPLSLPVTPGEPASISCRSSRGLLHSNGYNYLDWYLQKPGQSPQLLIYLGSNRASGVPDRFSGSGSVTDFTLNISRVEAEDVGVYYCMQALQTPFTFGPGTKVDIK		3.447	2.698	3.583	4.876	2.829	2.233	2.366	2.354	2.124	2.45	9.59945	31.1079
	C098	1.3m	VH3-53	JH3	GAGGTGCAGCTGGTGGAGTCTGGAGGAGGCTTGATCCAGCCTGGGGGGTCCCTGAGACTCTCCTGTGCAGCCTCTGGGTTCACCGTCAGTAGCAACTACATGAGCTGGGTCCGCCAGGCTCCAGGGAAGGGGCTGGAGTGGGTCTCAGTTATTTATAGCGGTGGTAGCACATACTACGCAGACTCCGTGAAGGGCCGATTCACCATCTCCAGAGACAATTCCAAGAACACGCTGTATCTTCAAATGAACAGCCTGAGAGCCGAGGACACGGCCGTGTATTACTGTGCGAGAGACCTGTATAGCAGTGGCGGGACCGATATCTGGGGCCAAGGGACAATGGTCACCGTCTCTTCAG	EVQLVESGGGLIQPGGSLRLSCAASGFTVSSNYMSWVRQAPGKGLEWVSVIYSGGSTYYADSVKGRFTISRDNSKNTLYLQMNSLRAEDTAVYYCARDLYSSGGTDIWGQGTMVTVSS		VK3-20	JK1	GAAATTGTGTTGACGCAGTCTCCAGGCACCCTGTCTTTGTCTCCAGGGGAAAGAGCCACCCTCTCCTGCAGGGCCAGTCAGAGTGTTAGCAGCAGCTACTTAGCCTGGTACCAGCAGAAACCTGGCCAGGCTCCCAGGCTCCTCATCTATGGTGCATCCAGCAGGGCCACTGGCATCCCAGACAGGTTCAGTGGCAGTGGGTCTGGGACAGACTTCACTCTCACCATCAGCAGACTGGAGCCTGAAGATTTTGCAGTGTATTACTGTCAGCAGTATGGTAGCTCACCGGGGACGTTCGGCCAAGGGACCAAGGTGGAAATCAAAC	EIVLTQSPGTLSLSPGERATLSCRASQSVSSSYLAWYQQKPGQAPRLLIYGASSRATGIPDRFSGSGSGTDFTLTISRLEPEDFAVYYCQQYGSSPGTFGQGTKVEIK		7.698	12.94	676.5	1402	49.69	20.56	>10000	6.345	9.394	5.39	478.597	4246.68
	C099	6.2m	VH3-53	JH3	GAGGTGCAGCTGGTGGAGTCTGGAGGAGGCTTGATCCAGCCGGGGGGGTCCCTGAGACTCTCCTGTGCAGCCTCTGGGATCACCGTCAGTAGCAACTACATGAGTTGGGTCCGCCAGGCTCCAGGGAAGGGGCTGGAGTGGGTCTCAGTTATGTATGCCGGTGGCAGCACATTCTACGCAGACTCCGTGAAGGGCCGATTCACCATCTCCAGAGACGATTCCAAGAACACGCTGTTTCTTCAAATGAACAGCCTGAGAGCCGAGGACACGGCCATATATTACTGTGCGAGAGACCTGTATAGCAGTGGCGGGACCGATATCTGGGGCCAAGGGACAATGGTCACCGTCTCTTCAG	EVQLVESGGGLIQPGGSLRLSCAASGITVSSNYMSWVRQAPGKGLEWVSVMYAGGSTFYADSVKGRFTISRDDSKNTLFLQMNSLRAEDTAIYYCARDLYSSGGTDIWGQGTMVTVSS		VK3-20	JK1	GAAATTGTGTTGACGCAGTCTCCAGGCACCCTGTCATTGTCTCCAGGGGAAAGAGCCACCCTCTCCTGCAGGGCCAGTCAGAGTATTGGCAGCAGCTACTTAGCCTGGTACCAGCAGAAACCTGGCCTGGCTCCCAGACTCCTCATCTATGGTGCATCCAGGAGGGCCACTGGCATCCCAGACAAATTCAGTGGCAGTGGGTCTGGGGCAGACTTCACTCTCACCATCAGCAGACTGGAGCCTGAAGATTTTGCAGTGTATTACTGTCAGCAGTATGGAAGCTCACCGGGGACGTTCGGCCAAGGGACCAAGGTGGAAATCAAAC	EIVLTQSPGTLSLSPGERATLSCRASQSIGSSYLAWYQQKPGLAPRLLIYGASRRATGIPDKFSGSGSGADFTLTISRLEPEDFAVYYCQQYGSSPGTFGQGTKVEIK		2.446	2.245	7.614	3.952	1.853	1.941	1.828	1.642	1.549	1.541	27.2305	86.0809
	C043	6.2m	VH1-58	JH3	TGCAGCTGGTGCAGTCTGGGCCTGAGGTGAAGAAGCCTGGGACCTCGGTGAAGGTCTCCTGCAAGGCTTCTGGATTCACCTTTTATAACTCTGCTGTGCAATGGGTGCGACAGGCTCGTGGACAACGCCTTGAGTGGGTAGGATGGATCGTCGTTGGCAGTGGTAACACAGACTACGCACAGAAGTTCCAGGAAAGAGTCACCATGACCAGGGACTTGTCCACAAACACAGCCTACATGGAGGTGAACAGCCTGAGATCCGAGGACACGGCCGTCTATTACTGTGCGGCCCCTTATTGTAGTGGTGGTACCTGCTTAGATGGTTTTGATATCTGGGGCCAAGGGACAATGGTCACCGTCTCTTCAG	QLVQSGPEVKKPGTSVKVSCKASGFTFYNSAVQWVRQARGQRLEWVGWIVVGSGNTDYAQKFQERVTMTRDLSTNTAYMEVNSLRSEDTAVYYCAAPYCSGGTCLDGFDIWGQGTMVTVSS		VK3-20	JK1	GAAATTGTGTTGACGCAGTCTCCAGGCACCCTGTCTTTGTCTCCAGGGGAAAGAGGCACCCTCTCCTGCAGGGCCAGTCAGAGTGTTAGAAGCAACTACTTAGCCTGGTATAAGCAGAGACCTGGCCAGGCTCCCAGGCTCCTCGTCTATGGTGCATCCAGCAGGGCCACTGGCATCCCAGACAGGTTCAGTGGCAGTGGGTCTGGGACAGACTTCACTCTCACCATCAGCAGACTGGAGCCTGAAGATTTTGCAGTGTATTACTGTCAGCAGTATGGTAGTTCACCGTGGACGTTCGGCCAAGGGACCAAGGTGGAAATCAAAC	EIVLTQSPGTLSLSPGERGTLSCRASQSVRSNYLAWYKQRPGQAPRLLVYGASSRATGIPDRFSGSGSGTDFTLTISRLEPEDFAVYYCQQYGSSPWTFGQGTKVEIK		12.13	11.2	18.77	1.347	1.891	1.446	1.365	1.524	1.349	1.515	10.5614	74.4293
	C044	1.3m	VH3-48	JH5	GAGGTGCAGCTGGTGGAGTCTGGGGGAGGCTTGGTACAGCCTGGGGGGTCCCTGAGACTCTCCTGTGCAGCCTCTGGATTCACCTTCAGTAGCTATAGCATGAACTGGGTCCGCCAGGCTCCAGGGAAGGGGCTGGAGTGGGTTTCATACATTAGTAGTAGTAGTAGTACCATATACTACGCAGACTCTGTGAAGGGCCGATTCACCATCTCCAGAGACAATGCCAAGAACTCACTGTATCTGCAAATGAACAGCCTGAGAGACGAGGACACGGCTGTGTATTACTGTGCGAGAGAGGCCCACGACGGGGCTCTCACCGACTACGGTGACTACCTTAACTGGTTCGACCCCTGGGGCCAGGGAACCCTGGTCACCGTCTCCTCAG	EVQLVESGGGLVQPGGSLRLSCAASGFTFSSYSMNWVRQAPGKGLEWVSYISSSSSTIYYADSVKGRFTISRDNAKNSLYLQMNSLRDEDTAVYYCAREAHDGALTDYGDYLNWFDPWGQGTLVTVSS		VL3-21	JL3	TCCTATGAGCTGACTCAGCCACCCTCAGTGTCAGTGGCCCCAGGAAAGACGGCCAGGATTACCTGTGGGGGAAACAACATTGGAAGTAAAAGTGTGCACTGGTACCAGCAGAAGCCAGGCCAGGCCCCTGTGCTGGTCATCTATTATGATAGCGACCGGCCCTCAGGGATCCCTGAGCGATTCTCTGGCTCCAACTCTGGGAACACGGCCACCCTGACCATCAGCAGGGTCGAAGCCGGGGATGAGGCCGACTATTACTGTCAGGTGTGGGATAGTAGTAGTGATCATCTTTATTGGGTGTTCGGCGGAGGGACCAAGCTGACCGTCCTAG	SYELTQPPSVSVAPGKTARITCGGNNIGSKSVHWYQQKPGQAPVLVIYYDSDRPSGIPERFSGSNSGNTATLTISRVEAGDEADYYCQVWDSSSDHLYWVFGGGTKLTVL		1821	2.893	2747	2.204	2.62	40.21	94.12	2.127	2.635	2.525	>10000	>10000
	C045	6.2m	VH3-48	JH5	GAGGTGCAGCTGGTGGAGTCTGGGGGAGGCTTGGTGCAGCCTGGGGGGTCCCTGAGACTCTCCTGTGCAGCCTCTGGATTCACCTTCAGTACTTATAGCATGAACTGGGTCCGCCAGGCTCCAGGGAAGGGGCTGGAGTGGGTTTCATACATTAGTAGTAGTAGTAGTACCATACACTACGCAGACTCTGTGAAGGGCCGATTCACCATCTCCAGAGACAATGCCAAGAACTCACTGTATCTACAAATGAACAGCCTGAGAGACGAAGACACGGCTGTGTATTACTGTGCGAGAGAGGCCCACGACGGGGCTCTCACCGACTACGGTGACTACCTTAACTGGTTCGACCCCTGGGGCCAGGGAACCCTGGTCACCGTCTCCTCAG	EVQLVESGGGLVQPGGSLRLSCAASGFTFSTYSMNWVRQAPGKGLEWVSYISSSSSTIHYADSVKGRFTISRDNAKNSLYLQMNSLRDEDTAVYYCAREAHDGALTDYGDYLNWFDPWGQGTLVTVSS		VL3-21	JL3	TCCTATGAGCTGACTCAGCCACCCTCAGTGTCAGTGGCCCCAGGAAAGACGGCCAGAATTACCTGTGGGGGCACCAACATTGGAAGTAAAAATGTGCACTGGTACCAGCAGAAGCCAGGCCAGGCCCCTGTGCTGGTCATCTATTATGATAATGACCGGCCCTCAGGGATCCCTGAGCGATTCTCTGGCTCCAACTCTGGGAACACGGCCACCCTGACCATCAGCAGGGTCGAAGCCGGGGATGAGGCCGACTATTACTGTCAGGTGTGGGATACTACTAGTGATCATTTTTATTGGGTGTTCGGCGGAGGGACCAAGCTGACCGTCCTAG	SYELTQPPSVSVAPGKTARITCGGTNIGSKNVHWYQQKPGQAPVLVIYYDNDRPSGIPERFSGSNSGNTATLTISRVEAGDEADYYCQVWDTTSDHFYWVFGGGTKLTVL		7.002	1.772	4.159	1.744	4.835	3.584	4.043	1.606	1.742	1.774	>10000	>10000
	C046	6.2m	VH3-9	JH4	GAGGTGCAGCTGGTGGAGTCTGGGGGAGGCTTGGCACAGCCTGGCAGGTCCCTGAGACTCTCCTGTGCAGCCTCTGGATTCACCTTTGATGATTATGCCATGCACTGGGTCCGGCAAGCTCCAGGGAAGGGCCTGGAGTGGGTCTCAGGTATTAATTGGAATAGTGGTAGTCTAGGCTATGCGGACTCTGTGAAGGGCCGGTTCACCATCTCCAGAGGCATCGCCAAGAACTCCCTGTATCTGCAAATGAACAGTCTGAGACCTGAGGACACGGCCTTCTATTACTGTGCAAAAGCGGGCGTAAGGGGTATAGCAGCAGCTGGTCCCGACCTCAACTTTGACTACTGGGGCCAGGGAACCCTGGTCACCGTCTCCTCAG	EVQLVESGGGLAQPGRSLRLSCAASGFTFDDYAMHWVRQAPGKGLEWVSGINWNSGSLGYADSVKGRFTISRGIAKNSLYLQMNSLRPEDTAFYYCAKAGVRGIAAAGPDLNFDYWGQGTLVTVSS		VK3-11	JK5	GAAATTGTGTTGACACAGTCTCCAGCCACCCTGTCTTTGTCTCCAGGCGAAAGAGCCACCCTCTCCTGCAGGGCCAGTCAGAGTGTTAGCAGCTACTTAGCCTGGTACCAACAGAAACCTGGCCAGGCTCCCAGGCTCCTCATCTATGATGCATCCAACAGGGCCACTGGCATCCCAGCCAGGTTCATTGGCAGTGGGTCTGGGACAGACTTCACTCTCACCATCAGCAGCCTAGAGCCTGAAGATTTTGCAGTTTATTACTGTCAGCAGCGTATCACCTTCGGCCAAGGGACACGACTGGAGATTAAAC	EIVLTQSPATLSLSPGERATLSCRASQSVSSYLAWYQQKPGQAPRLLIYDASNRATGIPARFIGSGSGTDFTLTISSLEPEDFAVYYCQQRITFGQGTRLEIK		4.015	n.d.	n.d.	n.d.	n.d.	n.d.	n.d.	n.d.	n.d.	n.d.	8.69049	52.5871
	C047	6.2m	VH4-39	JH5	CAGGTGCAGCTGCAGGAGTCGGGCCCAGGACTGGTGAAGCCTTCGGAGACCCTGTCCCTCACCTGCACTGTCTCTGGTGGCTCCATCAGTAGTACTACTTACTACTGGGACTGGATCCGCCAGTCCCCAGGGAAGGGGCTGGAGTGGATTGGAAGTATCTTTTATACTGGGATCACCTACTACAGCCCGTCCCTCAAGAGTCGAGTCACCATATCCGTAGACACGTCCAAGAACCAGTTCTCCCTGAGGCTGAACTCTATGACCGCCGCAGACACGGCTGTCTATTATTGTGCGAGACGCCTGCGTCAACTATGGTTCGGACCCTGGTTCGACCCCTGGGGCCAGGGAACCCTGGTCACCGTCTCCTCAG	QVQLQESGPGLVKPSETLSLTCTVSGGSISSTTYYWDWIRQSPGKGLEWIGSIFYTGITYYSPSLKSRVTISVDTSKNQFSLRLNSMTAADTAVYYCARRLRQLWFGPWFDPWGQGTLVTVSS		VL2-8	JL3	CAGTCTGCCCTGACTCAGCCTCCCTCCGCGTCCGGGTCTCCTGGACAGTCAGTCACCATCTCCTGCACTGGAACCCGCAGTGACGTTGGTGATTATAACTATGTCTCCTGGTACCAACAACACCCAGACAAGGCCCCCAAACTCATAATTTATGAGGTCACTAAGCGGCCCTCAGGGGTCCCTGATCGCTTCTCTGGCTCCAAGTCTGGCAACACGGCCTCCCTGACCGTCTCTGGGCTCCAGGCTGAGGATGAGGCTGATTATTACTGCAGCTCATATGCAGGCAGCAACAATGTGATGTTCGGCGGAGGGACCAAGCTGACCGTCCTAG	QSALTQPPSASGSPGQSVTISCTGTRSDVGDYNYVSWYQQHPDKAPKLIIYEVTKRPSGVPDRFSGSKSGNTASLTVSGLQAEDEADYYCSSYAGSNNVMFGGGTKLTVL		11.1	n.d.	n.d.	n.d.	n.d.	n.d.	n.d.	n.d.	n.d.	n.d.	>10000	>10000
	C048	1.3m	VH4-61	JH3	GTGCAGCTGCAGGAGTCGGGCCCAGGACTGGTGAAGCCTTCGGAGACCCTGTCCCTCACCTGCGCTGTCTCTGGTGGCTCCGTCAGCAGTGGTAATTACTACTGGAACTGGATCCGGCAGCCCCCAGGGAAGGGACTGGAGTGGATTGGGTATATCTATTACAGTGGGAGCACCAACTACAACCCCTCCCTCAAGAGTCGAGTCACCATATCAGTAGACACGTCCAAGAACCAGTTCTCCCTGAAGCTGAACTCTGTGACCGCTGCGGACACGGCCGTATATCACTGTGCGAGAGAAACCTATTACTATGATAGTAGTGGTTATTATATATCCGATGCTTTTGATATCTGGGGCCAAGGGACAATGGTCACCGTCTCTTCAG	VQLQESGPGLVKPSETLSLTCAVSGGSVSSGNYYWNWIRQPPGKGLEWIGYIYYSGSTNYNPSLKSRVTISVDTSKNQFSLKLNSVTAADTAVYHCARETYYYDSSGYYISDAFDIWGQGTMVTVSS		VK1-5	JK2	GACATCCAGATGACCCAGTCTCCTTCCACCCTGTCTGCATCTGTAGGAGACAGAGTCACCATCACTTGCCGGGCCAGTCAGAGTATTAGTAGCTGGTTGGCCTGGTATCAGCAGAAACCAGGGAAAGCCCCTAAGCTCCTGATCTATAAGGCGTCTAGTTTAGAAAGTGGGGTCCCATCAAGGTTCAGCGGCAGTGGATCTGGGACAGAATTCACTCTCACCATCAGCAGCCTGCAGCCTGATGATTTTGCAACTTATTACTGCCAACAGTATAATAGTTTTTCGTACACTTTTGGCCAGGGGACCAAGCTGGAGATCAAAC	DIQMTQSPSTLSASVGDRVTITCRASQSISSWLAWYQQKPGKAPKLLIYKASSLESGVPSRFSGSGSGTEFTLTISSLQPDDFATYYCQQYNSFSYTFGQGTKLEIK		4.804	5.023	17.1	6.931	3.743	4.085	3.886	3.382	3.985	3.135	62.1951	522.837
	C049	6.2m	VH4-61	JH3	CAGGTGCAGCTGCAGGAGTCGGGCCCAGGACTGGTGAAGCCTTCGGAGACCCTGTCCCTCACCTGCACTGTCTCTGGTGGCTCCGTCAGCAGTGGTACTTTCTACTGGAGCTGGATCCGGCAGCCCCCAGGGAAGGGACTGGAGTGGATTGGGTATATCCATTACAGTGGGAGCACCAACTACAACCCCTCCCTCAAGAGTCGAGTCACCATATCAGTAGACACGTCCAAGAACCAGTTCTCCCTGAGGCTGAGCTCTGTGACCGCTGCGGACACGGCCGTATATTATTGTGCGAGAGAATCGTTTTATTATGATAGAAGTGGTTATTATGGGTCTGATGCTTTTGATATCTGGGGCCAAGGGACAATGGTCACCGTCTCTTCAG	QVQLQESGPGLVKPSETLSLTCTVSGGSVSSGTFYWSWIRQPPGKGLEWIGYIHYSGSTNYNPSLKSRVTISVDTSKNQFSLRLSSVTAADTAVYYCARESFYYDRSGYYGSDAFDIWGQGTMVTVSS		VK1-5	JK2	GACATCCAGATGACCCAGTCTCCTTCCACCCTGTCTTCATCTGTAGGAGACAGAGTCACCATCACTTGCCGGGCCAGTCAGAATATTAGTAGGTGGTTGGCCTGGTATCAGCAGAAACCAGGGAAAGCCCCTAAGCTCCTGATCTATAAGGCGTCTACTTTAGAAAGTGGGGTCCCATCAAGGTTCAGCGGCAGTGGATCTGGGACAAAATTCACTCTCACCATCAGCAGCCTGCAGCCTGATGATTTTGCAACTTATTACTGCCAACAATATAATAGTTACTTGTACACTTTTGGCCAGGGGACCAAGCTGGAGATCAAAC	DIQMTQSPSTLSSSVGDRVTITCRASQNISRWLAWYQQKPGKAPKLLIYKASTLESGVPSRFSGSGSGTKFTLTISSLQPDDFATYYCQQYNSYLYTFGQGTKLEIK		4.086	4.778	7.733	4.794	3.273	2.755	3.316	2.412	2.834	3.051	18.1244	129.107
	C710	6.2m	VH4-39	JH5	CAGGTGCAGCTGCAGGAGTCGGGCCCAGGACTGGTGAAGCCTTCGGAGACCCTGTCCCTCACCTGCATTGTCTCTGGTGGCTCCATCAATAGTACTACTTACTACTGGGACTGGATCCGCCAGTCCCCAGGGAAGGGGCTGGAGTGGATTGGAAGTATCTTTTATACTGGGATCACCTACTACAGTCCGTCCCTCAAGACTCGAGTCACCATATCCGTAGACACGTCCAAGAACCAGTTCTCCCTGAGGCTGAACTCTATGACCGCCGCAGACACGGCTGTCTATTATTGTGCGAGACGCCTGCGTCAATTATGGTTCGGACCCTGGTTCGACCCCTGGGGCCAGGGAACCCTGGTCACCGTCTCCTCAG	QVQLQESGPGLVKPSETLSLTCIVSGGSINSTTYYWDWIRQSPGKGLEWIGSIFYTGITYYSPSLKTRVTISVDTSKNQFSLRLNSMTAADTAVYYCARRLRQLWFGPWFDPWGQGTLVTVSS		VL2-8	JL3	CAGTCTGCCCTGACTCAGCCTCCCTCCGCGTCCGGGTCTCCTGGACAGTCAGTCACCATCTCCTGCACTGGAACCCGCAGTGACGTTGGTGATTATAACTATGTCTCCTGGTACCAACAACACCCAGACAAGGCCCCCAAACTCATAATTTTTGAGGTCACTAAGCGGCCCTCAGGGGTCCCTGATCGCTTCTCTGGCTCCAAGTCTGGCAACACGGCCTCCCTGACCGTCTCTGGGCTCCAGGCTGAGGATGAGGCTGATTATTACTGCAGCTCATATGCAGGCAGCAGCAATGTGATGTTCGGCGGAGGGACCAAGCTGACCGTCCTAG	QSALTQPPSASGSPGQSVTISCTGTRSDVGDYNYVSWYQQHPDKAPKLIIFEVTKRPSGVPDRFSGSKSGNTASLTVSGLQAEDEADYYCSSYAGSSNVMFGGGTKLTVL		17.8	n.d.	n.d.	n.d.	n.d.	n.d.	n.d.	n.d.	n.d.	n.d.	>10000	>10000
	C703	6.2m	VH3-23	JH4	GAGGTGCAGCTGTTGGAGTCGGGGGGAGGCCTGGTACAGCCTGGGGGGTCCCTGAGACTCTCCTGTGCAGGCTCTGGATTCACCTTTAGCCATTATGCCTTGAGCTGGGTCCGCCAGGCTCCAGGGAAGGGGCTGGAGTGGGTCTCTTGTATTAGTGGTACTGGTGGTAACTCACACTACGCAGACTCCGTGAAGGGCCGGTTCACCAGCTCCAGAGACAATTCGAAGAACATTCTGTATCTGCAAATGAACAGCCTGAGAGCCGAGGACACGGCCGTATATTTCTGTGCGAAAGGGGGGGATTTTTGGAGTGGTTATCTCATACCGTTTGACTCCTGGGGCCAGGGAACCCTGGTCACCGTCTCCTCAG	EVQLLESGGGLVQPGGSLRLSCAGSGFTFSHYALSWVRQAPGKGLEWVSCISGTGGNSHYADSVKGRFTSSRDNSKNILYLQMNSLRAEDTAVYFCAKGGDFWSGYLIPFDSWGQGTLVTVSS		VL3-21	JL3	TCCTATGAGCTGACTCAGTCACCCTCAGTGTCAGTGGCCCCAGGAAAGACGGCCAGGATCACCTGTGGCGGAGACAGTATTGGAAGCAAAAATGTGCACTGGTACCAGCAGAAGCCAGGCCAGGCCCCTGTGTTGGTCATGTATTATGATAACGACCGGCCCTCAGGGATCCCTGAGCGATTCTCTGGCTACAACTCTGGGAACACGGCCACCCTGAGCATCAGCAGGGTCGAAGCCGGGGATGAGGCCGACTACTACTGTCTGGTGTGGGACGGTAGTGGTGATCCCTGGGTGTTCGGCGGAGGGACCAAGTTGACCGTCCTAG	SYELTQSPSVSVAPGKTARITCGGDSIGSKNVHWYQQKPGQAPVLVMYYDNDRPSGIPERFSGYNSGNTATLSISRVEAGDEADYYCLVWDGSGDPWVFGGGTKLTVL		10.95	n.d.	n.d.	n.d.	n.d.	n.d.	n.d.	n.d.	n.d.	n.d.	681.462	>10000
	C704	6.2m	VH3-30	JH4	AGGTGCAGCTGGTGGAGTCTGGGGGCGGCGTGGTCCAGCCTGGGAGGTCCCTGAGACTCTCCTGTGCAGCCTCTGGATTCACCTTCAGTAGATATGGCATGCACTGGGTCCGCCAGGCTCCAGGCAAGGGGCTGGAGTGGGTGGCAGTTTCATCATATGATGGAAGTAATGAATACTATGCAAACTCCGTGAAGGGCCGATTCACCATCTCCAGAGACAATTCCAAGAACACGCTGTATTTACAAATGAACAGCCTGAGAGCTGAGGACACGGCTGTGTATTACTGCGCGAAAACAGGGGCCTCATATTGTGGTGGTGACTGCCCATTCCACTTTGACTACTGGGGCCAGGGAACCCTGGTCACCGTCTCCTCAG	VQLVESGGGVVQPGRSLRLSCAASGFTFSRYGMHWVRQAPGKGLEWVAVSSYDGSNEYYANSVKGRFTISRDNSKNTLYLQMNSLRAEDTAVYYCAKTGASYCGGDCPFHFDYWGQGTLVTVSS		VK1-33	JK5	GCCATCCGGATGACCCAGTCTCCATCCTCCCTGTCTGCATCTGTAGGAGACAGAGTCACCATCACTTGCCAGGCGAGTCAGGACATTAACAACTATTTAAATTGGTATCAGCAGAAACCAGGGAAAGCCCCTAAGCTCCTGATCTACGATGCATCCGATTTGGAAACAGGGGTCCCATCAAGGTTCAGTGGAGGTGGATCTGGGACAGATTTTACTTTCACCATCAGCAGCCTGCAGCCTGAAGATATTGCAACATATTACTGTCAACACTATAATAATCTCCCGATCACCTTCGGCCAAGGGACACGACTGGAGATTAAAC	IRMTQSPSSLSASVGDRVTITCQASQDINNYLNWYQQKPGKAPKLLIYDASDLETGVPSRFSGGGSGTDFTFTISSLQPEDIATYYCQHYNNLPITFGQGTRLEIK		13.38	n.d.	n.d.	n.d.	n.d.	n.d.	n.d.	n.d.	n.d.	n.d.	>10000	>10000
	C706	6.2m	VH3-15	JH4	GAGGTGCAGCTGGTGGAGTCTGGGGGAGGCTTGGTAAAGCCTGGGGGGTCCCTTAGACTCTCCTGTGCAGCCTCTGGATTCACTTTCAGTAACGTCTGGATGAGCTGGGTCCGCCAGGCTCCAGGGAAGGGGCTGGAGTGGGTTGGCCGCATTAAAAGCAAAATTGATGGTGGGACAACAGAGTACGCTGCACCCGTGAAAGGCAGATTCATCATCTCAAGAGATGATTCAAAAAACACGCTGTCTCTGCAAATGAACAGCCTGAAAACCGAAGACACAGCCGTGTATTACTGTACCACAGACCACGGGCGGGAGCCTCCCGTTCACTGGGGCCAGGGAACCCTGGTCACCGTCTCCTCAG	EVQLVESGGGLVKPGGSLRLSCAASGFTFSNVWMSWVRQAPGKGLEWVGRIKSKIDGGTTEYAAPVKGRFIISRDDSKNTLSLQMNSLKTEDTAVYYCTTDHGREPPVHWGQGTLVTVSS		Vk3-20	JK5	GAAATTGTGTTGACGCAGTCTCCAGGCACCCTGTCTTTGTCTCCAGGGGAGAGAGCCTCCCTCTCCTGCAGGGCCAGGCAGAGTGTTTATAGCAACTACTTAGCCTGGTACCAGCACAAATCTGGCCAGGCTCCCAGGCTCCTCTTCTATGGTGCGTCCAGCAGGGCCACTGACATCCCAGACAGGTTCAGTGCCAGTGGGTCTGGGACAGACTTCACTCTCACCATCAGCAGACTGGAGCCTGAAGATTTTGCAGTGTATTACTGTCTACAGTATGGTCCCTCACCGACCTTCGGCCCAGGGACACGACTGGAGATTAAAC	EIVLTQSPGTLSLSPGERASLSCRARQSVYSNYLAWYQHKSGQAPRLLFYGASSRATDIPDRFSASGSGTDFTLTISRLEPEDFAVYYCLQYGPSPTFGPGTRLEIK		73.48	n.d.	n.d.	n.d.	n.d.	n.d.	n.d.	n.d.	n.d.	n.d.	2030.41	>10000
	C707	6.2m	VH3-21	JH4	GAGGTGCAGCTGGTGGAGTCTGGGGGAGGCCTGGTCAAGCCTGGGGGGTCCCTGAGACTCTCCTGTGCAGCCTCTGGATTTACGTTCAGTAGCTATTCCATGAACTGGGTCCGCCAGGCTCCAGGGAAGGGGCTGGCGTGGGTCTCATCCATAAGTAGTAGTAATAATATCATATACTACGCAGACTCAGTGAAGGGCCGATTCACCATCTCCAGAGACGACGCCAAGGACTCACTTTATCTGCACATGAAAAGCCTGAGAGCCGACGACACGGCTGTGTATTTCTGTGCGAGAGTCCCCTCCTGGGCCCCGTACCAGCTGCTGCCCGGCCCCTTTGACTACTGGGGCCAGGGAATTCTGGTCACCGTCTCCTCAG	EVQLVESGGGLVKPGGSLRLSCAASGFTFSSYSMNWVRQAPGKGLAWVSSISSSNNIIYYADSVKGRFTISRDDAKDSLYLHMKSLRADDTAVYFCARVPSWAPYQLLPGPFDYWGQGILVTVSS		VK1-33	JK4	GCCATCCGGATGACCCAGTCTCCATCCTCCCTGTCTGCATCTGTGGGAGACAGAGTCACCATCACTTGCCAGGCGAGTCAGGCCATTGCCAGCTATTTAAGTTGGTATCAGCATAAACCAGGGAGAGCCCCTAAACTCCTGATCTACGATGCTTCCAATTTGGAAATAGGGGTCCCATCAAGGTTCAGTGGAAGTGGATCTGGGACAGATTTCACTTTCACCATCAGCAGCCTGCAGTCTGAAGATAATGCAACATATTACTGTCAACAGTATGAAAGTCTCCCTGGCACTTTCGGCGGAGGGACCAAGGTGGAAATCAAAC	IRMTQSPSSLSASVGDRVTITCQASQAIASYLSWYQHKPGRAPKLLIYDASNLEIGVPSRFSGSGSGTDFTFTISSLQSEDNATYYCQQYESLPGTFGGGTKVEIK		25.99	n.d.	n.d.	n.d.	n.d.	n.d.	n.d.	n.d.	n.d.	n.d.	>10000	>10000
	C708	6.2m	VH3-7	JH6	GAGGTGCAGCTGGTGGAGTCTGGGGGAGGCTTGGTCCAGCCTGGGGGGTCCCTGAGACTCTCCTGCGCAGCCTCTGGATTCAGCTTTAGTACATATTGGATGAGCTGGGTCCGCCAGGCTCCAGGGAAGGGGCTGGAGTGGGTGGCCGACATAAAGCAAGATGGAAGTGAGAAATACTTTGTGGACTCTGTGAAGGGCCGATTCACCATCTCCAGAGACAACGCCAAGAACTCCCTGTATCTGCACCTGAACAGCCTGAGAGCCGAGGACACGGCTGTATATTACTGTGCGAGAGAAATGGCGGGTTCGGGGAATTATTATTGGTTTGGGTACGGTATGGACGTCTGGGGCCAAGGGACCACGGTCACCGTCTCCTCAG	EVQLVESGGGLVQPGGSLRLSCAASGFSFSTYWMSWVRQAPGKGLEWVADIKQDGSEKYFVDSVKGRFTISRDNAKNSLYLHLNSLRAEDTAVYYCAREMAGSGNYYWFGYGMDVWGQGTTVTVSS		VK1D-12	JK4	CATCCGGATGACCCAGTCTCCATCTTCTGTGTCTGCATCTGTAGGAGACAGAGTCACCATCACTTGTCGGGCGAGTCAGGGCATTAGCAGTTGGTTAGCCTGGTATCAACAGAAACCAGGAAAAGCCCCTAAGCTCCTGATCTATGCTGCATCCAGTTTGCAAAGTGGGGTCCCATCAAGGTTCAGCGGCAGTGAATCTGGGACAGATTTCACTCTCACTATCAGCAGCCTGCAGCCTGAAGATTTTGCAACTTACTATTGTCAACAGGCTAACAGCTTCCCGCTCACTTTCGGCGGAGGGACCAAGGTGGAGATCAAAC	IRMTQSPSSVSASVGDRVTITCRASQGISSWLAWYQQKPGKAPKLLIYAASSLQSGVPSRFSGSESGTDFTLTISSLQPEDFATYYCQQANSFPLTFGGGTKVEIK		130	n.d.	n.d.	n.d.	n.d.	n.d.	n.d.	n.d.	n.d.	n.d.	488.951	8858.44
	C709	6.2m	VH1-8	JH4	CAGGTGCAGCTGGTGCAGTCTGGGGCTGAGGTGAGGAAGCCTGGGGCCTCAGTGAAGGTCTCCTGTATGGCGTCTGGGTACACCTTCAACACCTATGATATCAACTGGGTGCGACAGGGCACTGGACAAGGGCTTGAGTGGATGGGATGGATGAATCCTAACAGTGGAAACACAGGCCATGCACAGAAGTTCCAGGGCAGAGTCGCCATGACCGTGAACACCTCCATGAACACAGCCTACATGGAGTTGAGCAGCCTGAGATCTGAGGACACGGCCGTCTATTACTGTGCGAGAGGCGCCGATATGTTAAACGTTGCAGTGGGTGCCGACTTTGACTACTGGGGCCAGGGAACCCTGGTCACCGTCTCCTCAG	QVQLVQSGAEVRKPGASVKVSCMASGYTFNTYDINWVRQGTGQGLEWMGWMNPNSGNTGHAQKFQGRVAMTVNTSMNTAYMELSSLRSEDTAVYYCARGADMLNVAVGADFDYWGQGTLVTVSS		VL2-8	JL3	CAGTCTGCCCTGACTCAGCCTCCCTCCGCGTCCGGGTCTCCTGGACAGTCAGTCACCATCTCCTGCACTGGAACCAGCAGTGACGTTGGTGGTTATAACTTTGTCTCCTGGTTCCAACAACACCCAGGCAAAGCCCCCAAACTCATGATTTATGAGGTCAGTAAGCGGCCCTCAGGGGTCCCTGATCGCTTCTCTGGCTCCAAGTCTGCCAACACGGCCTCCCTGACCGTCTCTGGGCTCCAGGCTGAAGATGAGGCTGATTATTTCTGCAGCTCATATGCAGGCAGCAACAATTGGGTGTTCGGCGGAGGGACCAAGCTGACCGTCCTAG	QSALTQPPSASGSPGQSVTISCTGTSSDVGGYNFVSWFQQHPGKAPKLMIYEVSKRPSGVPDRFSGSKSANTASLTVSGLQAEDEADYFCSSYAGSNNWVFGGGTKLTVL		7.559	n.d.	n.d.	n.d.	n.d.	n.d.	n.d.	n.d.	n.d.	n.d.	406.544	>10000
COV107	C565	6.2m	VH3-53	JH3	GAGGTGCAGCTGGTGGAGTCTGGAGGAGGCTTGATCCAGCCTGGGGGGTCCCTGAGACTCTCCTGTGCAGCCTCTGGGTTAATTGTCAGTAGCAACTACATGAACTGGGTCCGCCAGGCTCCAGGGAAGGGGCTGGAGTGGGTCTCACTTCTTTATAGCGGTGGTAGCACATACTACGCAGATTCCGTGAAGGGCCGATTCACCATCTCCAGAGACAATTCCAAGAACACGCTGTATCTTCAGATGAACAGCCTGAGACCCGAGGACACGGCCGTGTATTACTGTGCGAGAGATTTATCCGTCGTGGGTGCTTTTGATATCTGGGGCCAAGGGACAATGGTCACCGTCTCTTCAG	EVQLVESGGGLIQPGGSLRLSCAASGLIVSSNYMNWVRQAPGKGLEWVSLLYSGGSTYYADSVKGRFTISRDNSKNTLYLQMNSLRPEDTAVYYCARDLSVVGAFDIWGQGTMVTVSS		VK3-20	JK3	GAAATTGTGTTGACGCAGTCTCCAGGCACCCTGTCTTTGTCTCCAGGGGAAAGAGCCACCCTCTCCTGCAGGGCCAGTCAGAGTCTTCCCAGCACCTACTTAGCCTGGTACCAGCAGAAACGTGGCCAGGCTCCCAGGCTCCTCATCTATGGTGCATCCAGCAGGGCCACTGGCATCCCAGACAGGTTCAGTGGCAGTGGGTCTGGGACAGACTTCACTCTCACCATCAGCAGACTGGAGCCTGAAGACTTTGCAGTGTATTACTGTCAGCAGTATGGTACCTCACCTCGGGTCACTTTCGGCCCTGGGACCAAAGTGGATATCAAAC	EIVLTQSPGTLSLSPGERATLSCRASQSLPSTYLAWYQQKRGQAPRLLIYGASSRATGIPDRFSGSGSGTDFTLTISRLEPEDFAVYYCQQYGTSPRVTFGPGTKVDIK		1.27	n.d.	n.d.	n.d.	n.d.	n.d.	n.d.	n.d.	n.d.	n.d.	25.5777	77.5874
	C566	6.2m	VH4-31	JH5	CAGGTGCAGCTGCAGGAGTCGGGCCCAGGACTGGTGAAGTCTTCACAGACCCTGTCCCTCAACTGCAGTGTCTTTGGTGCCTCCATCAGCAGTGGTGGTTACTACTGGACTTGGATCCGCCAGCACCCAGGGAAGGGCCTGGAGTGGATTGGGTACATCCATTATAGGGGGACCTACTACAACCCGTCCCTCAAGAGTCGAGTTACCATGTCAGTAGACACGTCTAAGAACCAGTTCTCCCTGAAGGTGAGATCTGTGAGTGCAGCGGACACGGCCATCTATTACTGTGCGAGAGCGATAGTGGTGGTTACCCTGAACTGGTTCGACCTCTGGGGCCAGGGAACCCTGGTCACCGTCTCCTCAG	QVQLQESGPGLVKSSQTLSLNCSVFGASISSGGYYWTWIRQHPGKGLEWIGYIHYRGTYYNPSLKSRVTMSVDTSKNQFSLKVRSVSAADTAIYYCARAIVVVTLNWFDLWGQGTLVTVSS		VL6-57	JL2	AATTTTATGCTGACTCAGCCCCACTCTGTGTCGGAGTCTCCGGGGAAGACGGTAACCATCTCCTGTTCCGGCAGCGGTGGCAGCATTGCCAGCAACTATGTGCAGTGGTACCAGCAGCGCCCGGGCAGTGCCCCCACCGCTGTGATCTATGAGGATAACCAAAGACCCTCTGGGGTCCCTGATCGATTCTCTGGCTCCATCGACAGCTCCTCCAACTCTGCCTCCCTCACCATCTCTGGACTGAAGACTGAGGACGAGGCTGACTACTACTGTCAGTCTTATGATACCAGCAATCCTGTGATATTCGGCGGAGGGACCAAACTGACCGTCCT	NFMLTQPHSVSESPGKTVTISCSGSGGSIASNYVQWYQQRPGSAPTAVIYEDNQRPSGVPDRFSGSIDSSSNSASLTISGLKTEDEADYYCQSYDTSNPVIFGGGTKLTV		5.884	n.d.	n.d.	n.d.	n.d.	n.d.	n.d.	n.d.	n.d.	n.d.	129.68	1776.43
	C567	6.2m	VH4-61	JH4	CAGGTGCAGCTGCAGGAGTCGGGCCCAGGACTGGTGAAGCCTTCGGAGACCCTGTCCCTCACCTGCACTGTCTCTGGTGGCTCCGTCATCAATGGTAGTTACTACTGGAGCTGGATCCGTCAGCCCCCAGGGAAGGGACTGGAGTGGATTGGATTTGTCTATTACAGTGGGAGCACCAACTACAACCCCTCCCTCAAGAGTCGGGTCACCATATCAGTAGACACGTCCAAGAACCAGTTCTCCCTAAACCTGAACTCTGTGACCGCTGCGGACACGGCCGTGTATTACTGTGCAACAGGGTCGAAGTCTTCGTACTACTTTGACTACTGGGGCCAGGGAACCCTGGTCACCGTCTCCTCAG	QVQLQESGPGLVKPSETLSLTCTVSGGSVINGSYYWSWIRQPPGKGLEWIGFVYYSGSTNYNPSLKSRVTISVDTSKNQFSLNLNSVTAADTAVYYCATGSKSSYYFDYWGQGTLVTVSS		VL1-51	JL1	CAGTCTGTGCTGACTCAGCCGCCCTCAGTGTCTGCGGCCCCAGGACAGAAGGTCACCATCTCCTGCTCTGGAAGCAGCTCCAACATTGGAAATAATTATGTATCCTGGTACCAGCAACTCCCAGGAGCAGCCCCCAAACTCCTCATCTATGAAAATAATATGCGACCCTCAGGGATTCCTGACCGATTCTCTGGCTCCAAGTCTGGCACGTCAGCCACCCTGGGCATCACCGGACTCCAGACTGGGGACGAGGCCGATTATTACTGCGGAACATGGGATAGCAGCCTGAGTGTTCCTTATGTCTTCGGAACTGGGACCAGGGTCACCGTCCTAG	QSVLTQPPSVSAAPGQKVTISCSGSSSNIGNNYVSWYQQLPGAAPKLLIYENNMRPSGIPDRFSGSKSGTSATLGITGLQTGDEADYYCGTWDSSLSVPYVFGTGTRVTVL		18.9	n.d.	n.d.	n.d.	n.d.	n.d.	n.d.	n.d.	n.d.	n.d.	>10000	>10000
	C568	6.2m	VH1-46	JH4	CAGGTGCAGCTGGTGCAGTCTGGAGCTGAGGTGAAGAAGCCTGGGGCCTCAGTGAAGGTTTCCTGCACGGCATCTGGATACACCTTCTCCAGCTACTATATACACTGGGTGCGACAGGCCCCTGGACAAGGGCTTGAGTGGATGGGAATAATCAACCCTGGTGCTGGTAGCACAAGCTACGCACAGAAGTTCCAGGGCAGAGTCGCCATGACCACGGACACGTCCACGAGGACAGTCTACATGGAGCTGAGCAGCCTGAGATCTGACGACACGGCCGTGTATTACTGTGCGAGAGATGAAGCCTTTCTACCATCTGCTATATTTGTCGGGGACTACTGGGGCCAGGGAACCCTGGTCACCGTCTCCTCAG	QVQLVQSGAEVKKPGASVKVSCTASGYTFSSYYIHWVRQAPGQGLEWMGIINPGAGSTSYAQKFQGRVAMTTDTSTRTVYMELSSLRSDDTAVYYCARDEAFLPSAIFVGDYWGQGTLVTVSS		VK1-17	JK1	GACATCCAGATGACCCAGTCTCCATCCTCCCTGTCTGCATCTGTAGGAGACAGAGTCACCATCACTTGCCGGGCAAGTCAGGGCATTAGAAATGATTTAGGCTGGTATCAGCAGAAACCAGGGAAAGCCCCTAAGCGCCTGATCTATGCTGCATCCAATTTGCAAAGTGGGGTCCCATCAAGGTTCAGCGGCAGTGGATCTGGGACAGAATTCACTCTCACAATCAGCAGCCTGCAGCCTGAAGATTTTGCAACTTATTACTGTCTGCAACATAGTACTTACCCTCACACGTGGACGTTCGGCCAAGGGACCAAGGTGGAAATCAAAC	DIQMTQSPSSLSASVGDRVTITCRASQGIRNDLGWYQQKPGKAPKRLIYAASNLQSGVPSRFSGSGSGTEFTLTISSLQPEDFATYYCLQHSTYPHTWTFGQGTKVEIK		5.99	n.d.	n.d.	n.d.	n.d.	n.d.	n.d.	n.d.	n.d.	n.d.	>10000	>10000
	C569	6.2m	VH3-30	JH4	CAGGTGCAGCTGGTGGAGTCGGGGGGAAACGTGGTCCAGCCTGGGAGGTCCCTGAGACTCTCCTGTGCAGCCTCTGGATTCACCTTCAGTAACTATGGCATGCACTGGATCCGCCAGGCTCCAGGCAAGGGGCTGGAGTGGGTGGCAGTTATATCATATGATGGAAGTGATAAATACTATGCAGACTCCGTGAAGGGCCGAGTCACCATCTCCAGAGACAACTCCAAGAACACGCTGTATCTGCAAATGAACAGCCTGAGAGCTGAGGACACGGCTGTATATTACTGTGCGAAAGGGGGTCCCTACGGTGACCACGTTCGTTCTGACTACTGGGGCCTGGGAACCCTGGTCACCGTCTCCTCAG	QVQLVESGGNVVQPGRSLRLSCAASGFTFSNYGMHWIRQAPGKGLEWVAVISYDGSDKYYADSVKGRVTISRDNSKNTLYLQMNSLRAEDTAVYYCAKGGPYGDHVRSDYWGLGTLVTVSS		VK1-33	JK2	GACATCCAGATGACCCAGTCTCCATCCTCCCTGTCTGCATCTGTAGGAGACAGAGTCACCATCACTTGCCAGGCGAGTCAGGACATTAGCAACTATTTAAATTGGTATCAACAGAAACCAGGGAAAGTCCCTAAGCTCCTGATCTACGACGCATCCAATTTGGAAACAGGGGTCCCATCAAGGTTCAGTGGAAGTGGATCTGGGACAGATTTTACTTTCACCATCAGCAGCCTGCAGCCTGAAGACATTGCAACATATTACTGTCAACAGTTTCATAATCTCCCTTTGACTTTTGGCCAGGGGACCAAGCTGGAGATCAAAC	DIQMTQSPSSLSASVGDRVTITCQASQDISNYLNWYQQKPGKVPKLLIYDASNLETGVPSRFSGSGSGTDFTFTISSLQPEDIATYYCQQFHNLPLTFGQGTKLEIK		11.05	n.d.	n.d.	n.d.	n.d.	n.d.	n.d.	n.d.	n.d.	n.d.	2427.93	>10000
	C570	6.2m	VH4-59	JH6	CAGGTGCAGCTGCAGGAGTCGGGCCCAGGACTGGTGAAGCCTTCGGAGACCCTGTCCCTCACCTGCACTGTCTCTGGTGCCTCCATCAGTAGTTATTACTGGAGCTGGATCCGGCAGCCCCCAGGGAAGGGACTGGAGTGGATTGGGTATATCTATTACAGTGGGAGCACCAACTACAACCCCTCCCTCAAGAGTCGAGTCACCATATCACTAGACACGTCCAAGAACCAGTTCTCCCTGCAGCTGAGCTCTGTGACCGCTGCGGACACGGCCGTGTATTACTGTGCGACTTATTACTTTGATAATAGTGGTTATTCATACGGTCTGGACGTCTGGGGCCAAGGGACCACGGTCACCGTCTCCTCA	QVQLQESGPGLVKPSETLSLTCTVSGASISSYYWSWIRQPPGKGLEWIGYIYYSGSTNYNPSLKSRVTISLDTSKNQFSLQLSSVTAADTAVYYCATYYFDNSGYSYGLDVWGQGTTVTVSS		VK1-39	JK1	GACATCCAGATGACCCAGTCTCCATCCTCCCTGTCTGCATCTGTAGGAGACAGAGTCACCATCGCTTGCCGGGCAAGTCAGAGCATTTCTAGTTATTTACATTGGTATCAGCAGCAGCCAGGGAAGGCCCCTAAGCTCCTGATCTATGCTGTAACCAATTTACAAAGTGGGGTCCCATCTAGGTTCAGTGGCAGTGGATCTGGGACAGATTTCACTCTCACCATCAGTAGTCTCCAACCTGAAGATTTTGCTACTTACTACTGTCAACAGAGTTACAGTCTCCCTCAGACGTTCGGCCAAGGGACCAAGGTGGAAATCAAAC	DIQMTQSPSSLSASVGDRVTIACRASQSISSYLHWYQQQPGKAPKLLIYAVTNLQSGVPSRFSGSGSGTDFTLTISSLQPEDFATYYCQQSYSLPQTFGQGTKVEIK		0.74	n.d.	n.d.	n.d.	n.d.	n.d.	n.d.	n.d.	n.d.	n.d.	207.049	>10000
	C571	6.2m	VH3-53	JH4	GAGGTGCAGCTGGTGGAGTCTGGAGGAGGGTTGATCCAGCCTGGGGGGTCCCTAAAACTCTCCTGTGTAGTCTCTGGGTTCACCGTCAGTCGCAACTACATCAGTTGGGTCCGCCAGGCCCCAGGCAAGGGGCTGGAATGGGTCTCAGTTCTTTTTGCCGGTGGTAGTACGTTCTACGCAGACTCCGTTAAGGGCCGATTCGCCATCTCCAGAGACAACTCCAACAACACACTGTTTCTTCAAATGAACAGCCTGAGAGTCGAGGACACGGCCATTTATTACTGTGCGAGAGGGGACGGGGAGTTAATCTTTGACCAGTGGGGCCAGGGAACCCTGGTCACCGTCTCCTCAG	EVQLVESGGGLIQPGGSLKLSCVVSGFTVSRNYISWVRQAPGKGLEWVSVLFAGGSTFYADSVKGRFAISRDNSNNTLFLQMNSLRVEDTAIYYCARGDGELIFDQWGQGTLVTVSS		VL1-40	JL3	CAGTCTGTGCTGACTCAGCCGCCCTCAGTGTCTGGGGCCCCAGGGCAGAGGGTCACCATCGTCTGCACTGGGACCAGTTCCAACATCGGGGCAGGTTATGATGTGCACTGGTACCAGCAACTTCCTGGAAGAGCCCCCAAAGTCCTCGTCTCTGGAAACAACATTCGGCCCTCAGAGGTCCCTGACCGATTCTCTGGCTCCAGGTCTGGCACCTCAGCCTCCCTGGCCATCACTAGTCTCCAGCCTGAGGATGAGGCTCAATATTACTGTCAGTCTTATGACAGCAATCTCTATGCGGTGTTCGGCGGAGGGACCAAGCTGACCGTCCTA	QSVLTQPPSVSGAPGQRVTIVCTGTSSNIGAGYDVHWYQQLPGRAPKVLVSGNNIRPSEVPDRFSGSRSGTSASLAITSLQPEDEAQYYCQSYDSNLYAVFGGGTKLTVL		4.625	2.828	26.56	1.929	4.104	4.783	>10000	3.791	3.51	3.281	326.238	2134.35
	C572	6.2m	VH3-49	JH4	GAGGTGCAGCTGGTGGAGTCTGGGGGAGGCTTGATAAAGCCAGGGCGGTCCCTGAGACTCTCTTGTACAGCCTCTGGATTCACCTTTGGTGATTATGCTATGACCTGGTTCCGCCAGGCTCCAGGGAAGGGACTGGAGTGGGTAGGTTTCATTAGAAGTAAAGCTTATGGTGGGACAACAGGATACGCCGCGTCTGTGAAATACAGATTTACCATCTCAAGAGATGATTCCAAAAGCATCGCCTATCTGCAAATGGACAGCCTGAAAACCGAGGACACAGCCGTGTATTACTGTACTAGGTGGGACGGATGGAGTCAACATGACTATTGGGGCCAGGGAACCCTGGTCACCGTCTCCTCAG	EVQLVESGGGLIKPGRSLRLSCTASGFTFGDYAMTWFRQAPGKGLEWVGFIRSKAYGGTTGYAASVKYRFTISRDDSKSIAYLQMDSLKTEDTAVYYCTRWDGWSQHDYWGQGTLVTVSS		VK2-28	JK2	GATATTGTGATGACTCAGTCTCCACTCTCCCTGTCCGTCACCCCTGGAGAGCCGGCCTCCATCTCCTGCAGGTCTAGTCAGAGCCTCCTGCACAGTAATGGAAACAACTATTTCGATTGGTACCTGCAGAAGCCAGGGCAGTCTCCACAGCTCCTGATCTATTTGGCTTCTAATCGGGCCTCCGGGGTCCCTGACAGGTTCAGTGGCAGTGGATCAGGCACAGATTTTACACTGAAGATCAGCAGAGTGGAGGCTGAGGATGTTGGGGTTTATTACTGCATGCAAGTTCTACAAATTCCGTACACTTTTGGCCAGGGGACCAAGCTGGAGATCAA	DIVMTQSPLSLSVTPGEPASISCRSSQSLLHSNGNNYFDWYLQKPGQSPQLLIYLASNRASGVPDRFSGSGSGTDFTLKISRVEAEDVGVYYCMQVLQIPYTFGQGTKLEI		2.903	2.432	3974	297.4	2.016	1.462	2.2	1.485	3.186	1.722	72.6285	1800.09
	C573	6.2m	VH4-4	JH3	CAGGTGCAGCTGCAGGAGTCGGGCCCAGGACTGGTGAAGCCTTCGGGGACCCTGTCCCTCACCTGCGCTGTCTCTGGTGGCTCCATCAGCACTGTTAACTGGTGGAGTTGGGTCCGCCAGCCCCCAGGGAAGGGGCTGGAGTGGATTGGGGAAATCCATCATAGTGGGAACACCAACCACAACCCGTCCCTCAGGAGTCGAGTCACCATATCAGTAGACAAGTCCAAGAACCAGTTCTCCCTGAAGCTGAGGTCTGTGACCGCCGCGGACACGGCCGTATATTACTGTGCGAGAGATGGAGGACGACCCGGGGATGCTTTTGATCTCTGGGGCCAAGGGACAATGGTCACCGTCTCTTCAG	QVQLQESGPGLVKPSGTLSLTCAVSGGSISTVNWWSWVRQPPGKGLEWIGEIHHSGNTNHNPSLRSRVTISVDKSKNQFSLKLRSVTAADTAVYYCARDGGRPGDAFDLWGQGTMVTVSS		VL2-14	JL1	CAGTCTGCCCTGACTCAGCCTGCCTCCGTGTCTGGGTCTCCTGGACAGTCGATCACCATCTCCTGCACTGGAACCAGCAGTGACGTTGGTGGTTATAACTATGTCTCCTGGTACCAACAACACCCAGGCAAAGTCCCCAAAGTCATGATATATGATGTCAGTAATCGGCCCTCAGGGATATCTAATCGCTTCTCTGGCTCCAAGTCTGGCAACACGGCCTCCCTGACCATCTCTGGGCTCCAGGCTGAGGACGAGGCTGATTATTACTGCAACTCATATAGAAGCAACAGCACTCGAGTCTTCGGAACTGGGACCAAGGTCACCGTCCT	QSALTQPASVSGSPGQSITISCTGTSSDVGGYNYVSWYQQHPGKVPKVMIYDVSNRPSGISNRFSGSKSGNTASLTISGLQAEDEADYYCNSYRSNSTRVFGTGTKVTV		2.202	3555	5.567	2.272	1.9	1.605	2.086	1.358	1.398	1.544	13.4072	117.644
	C574	1.3m	VH1-18	JH4	CAGGTTCAGCTGGTGCAGTCTGGAGCTGAGGTGAAGAAGCCTGGGGCCTCAGTGAAGGTCTCCTGCAAGGCTTCTGGTTACACCTTTACCAGCTATGGTTTCAGCTGGGTGCGACAGGCCCCTGGACAAGGGCTTGAGTGGCTGGGATGGATCAGCGCTTACAATGGTAACACAAACTATGCACAGAAGCTCCAGGGCAGAGTCACCATGACCACAGACACATCCACGAGCACAGCCTACATGGAGCTGAGGAGCCTGAGATCTGACGACACGGCCGTGTATTACTGTGCGAGAGCAATAGCAGTGGCTGGTACGAGCGGCGAATTTGACTACTGGGGCCAGGGAACCCTGGTCACCGTCTCCTCAG	QVQLVQSGAEVKKPGASVKVSCKASGYTFTSYGFSWVRQAPGQGLEWLGWISAYNGNTNYAQKLQGRVTMTTDTSTSTAYMELRSLRSDDTAVYYCARAIAVAGTSGEFDYWGQGTLVTVSS		VL1-44	JL2	CAGTCTGTGCTGACGCAGCCACCCTCAGCGTCTGGGACCCCCGGGCAGAGGGTCACCATCTCTTGTTCTGGAAGCAGCTCCAACATCGGAAGTAATACTGTAAACTGGTACCAGCAGCTCCCAGGAACGGCCCCCAAACTCCTCATCTATAGTAATAATCAGCGGCCCTCAGGGGTCCCTGACCGATTCTCTGGCTCCAAGTCTGGCACCTCAGCCTCCCTGGCCATCAGTGGGCTCCAGTCTGAGGATGAGGCTGATTATTACTGTGCAGCATGGGATGACAGCCTGAATGGTCATGTGGTATTCGGCGGAGGGACCAAGCTGACCGTCCTAG	QSVLTQPPSASGTPGQRVTISCSGSSSNIGSNTVNWYQQLPGTAPKLLIYSNNQRPSGVPDRFSGSKSGTSASLAISGLQSEDEADYYCAAWDDSLNGHVVFGGGTKLTVL		8.121	>10000	>10000	2.611	5.394	>10000	4.677	2.626	3.015	2.707	>10000	>10000
	C575	6.2m	VH1-18	JH4	CAGGTTCAGCTGGTGCAGTCTGGAGCTGAGGTGAAGAAGCCTGGGGCCTCAGTGATGCTCTCCTGCAAGGCTTCTGGTTACACCTTTACCAGCTATGGTATCAGCTGGGTGCGACAGGCCCCTGGACAAGGGCTTGAGTGGATGGGATGGATCAGCGCTTACAATGGTAACACAAACTATGCACAGAAGCTCCAGGGCAGAGTCTCCATGACCACAGACACATCCACGAGCACAGCCTACATGGAGCTGAGGAGCCTGAGATCTGACGACACGGCCGTGTATTACTGTGCGAGAGCAATGGCAGTGGCTGGTACGAGCGGCGACTTTGACTACTGGGGCCAGGGAACCCTGGTCACCGTCTCCTCAG	QVQLVQSGAEVKKPGASVMLSCKASGYTFTSYGISWVRQAPGQGLEWMGWISAYNGNTNYAQKLQGRVSMTTDTSTSTAYMELRSLRSDDTAVYYCARAMAVAGTSGDFDYWGQGTLVTVSS		VL1-44	JL2	CAGTCTGTGCTGACGCAGCCACCCTCAGCGTCTGGGACCCCCGGGCAGAGGGTCACCATCTCTTGTTCTGGAAGCAGCTCCAACATCGGAAGTAATACTGTAAACTGGTACCAGCAGCTCCCAGGAACGGCCCCCAAACTCCTCATCTATAGTAATAATCAGCGGCCCTCAGGGGTCCCTGACCGATTCTCTGGCTCCAAGTCTGGCACCTCAGCCTCCCTGGCCATCAGTGGGCTCCAGTCTGAGGATGAGGCTGATTATTACTGTGCAGCATGGGATGACAGCCTGAATGGTCATGTGGTATTCGGCGGAGGGACCAAGCTGACCGTCCTAG	QSVLTQPPSASGTPGQRVTISCSGSSSNIGSNTVNWYQQLPGTAPKLLIYSNNQRPSGVPDRFSGSKSGTSASLAISGLQSEDEADYYCAAWDDSLNGHVVFGGGTKLTVL		6.086	>10000	>10000	2.893	5.501	>10000	4.404	2.392	2.661	2.311	5394.51	>10000
	C576	1.3m	VH1-69	JH4	CAGGTGCAGCTGGTGCAGTCTGGGGCTGAGGTGAAGAAGCCTGGGTCCTCGGTGAAGGTCTCCTGCAAGGCTTCTGGAGGCACCTTCAGCATCTATGCTATCAGCTGGGTGCGACAGGCCCCTGGACAAGGGCTTGAGTGGATGGGAGGGATCATCCCTATCTTAGGTACAGCAAACTACGCACAGAAGTTCCAGGGCAGAGTCACGATTACCGCGGACGAATCCACGAGCACAGCCTACATGGAGCTGAGCAGCCTGAGATCTGAAGACACGGCCGTGTATTACTGTGCGAGCTTTCATGTAGCCTACGGTGACTACATCCCCTTTGACTACTGGGGCCAGGGAACCCTGGTCACCGTCTCCTCAG	QVQLVQSGAEVKKPGSSVKVSCKASGGTFSIYAISWVRQAPGQGLEWMGGIIPILGTANYAQKFQGRVTITADESTSTAYMELSSLRSEDTAVYYCASFHVAYGDYIPFDYWGQGTLVTVSS		VK3-20	JK1	GAAATTGTGTTGACGCAGTCTCCAGGCACCCTGTCTTTGTCTCCAGGGGAAAGAGCCACCCTCTCCTGCAGGGCCAGTCAAAGTGTTAGCAGCAGCTACTTAGCCTGGTACCAGCAGAAACCTGGCCAGGCTCCCAGGCTCCTCATCTATGGTGCATCCAGCAGGGCCACTGGCATCCCAGACAGGTTCAGTGGCAGTGGGTCTGGGACAGACTTCACTCTCACCATCAGCAGACTGGAGCGTGAAGATTTTGCAGTGTATTACTGTCAGCAGTATGGTAGGTCACCAACGTGGACGTTCGGCCAAGGGACCAAGGTGGAAATCAAAC	EIVLTQSPGTLSLSPGERATLSCRASQSVSSSYLAWYQQKPGQAPRLLIYGASSRATGIPDRFSGSGSGTDFTLTISRLEREDFAVYYCQQYGRSPTWTFGQGTKVEIK		5.29	2.792	7.882	2.682	3.065	4.368	2.628	2.611	2.544	2.267	16.185	312.741
	C577	6.2m	VH1-69	JH4	CAGGTGCAGCTGGTGCAGTCTGGGGCTGAGGTGAAGAAGCCTGGGTCTTCGGTGAAGGTCTCCTGTAAGGCTTCTGGAGACACCTTCAGCATCTATGCTTTCAGTTGGGTGCGACAGGCCCCTGGACAAGGGCTTCAGTGGATGGGGGCGATCATCCCTCTCCTTGGCACAACAAACTACGCTCAGAAATTCCTGGGCAGAGTCACGATTACCGCGGACGAATCCACGAGCACAACGTTCATGGAGCTGAGCAGCCTCACATCTGAGGACACGGCCGTCTATCACTGCGCGACCTTTCATGTAGCCTACGGTGACTACATCCCCTTTGACTCCTGGGGCCAGGGAACCCTGGTCACCGTCTCCTCAG	QVQLVQSGAEVKKPGSSVKVSCKASGDTFSIYAFSWVRQAPGQGLQWMGAIIPLLGTTNYAQKFLGRVTITADESTSTTFMELSSLTSEDTAVYHCATFHVAYGDYIPFDSWGQGTLVIVSS		VK3-20	JK1	GAAATTGTGTTGACGCAGTCTCCAGGCACCCTGTCTTTGTCTCCAGGGGAAAGAGCCACCCTCTCCTGCAGGGCCAGTCAGAGTGTTACCAGCAGCTACTTAGCCTGGTACCAGCAGAAACCTGGCCAGGCTCCCAGGCTCCTCATCTACGGTGCATCCAGCAGGGCCACTGGCATCCCAGACAGGTTCAGTGGCAGTGGGTCTGGGACAGACTTCACTCTCACCATCAGCAGACTGGAGCCTGAAGATTTTGCAGTGTATTACTGTCAGCAGTATGGTAGGTCACCAACCTGGACGTTCGGCCAAGGGACCAAGGTGGAAATCAAAC	EIVLTQSPGTLSLSPGERATLSCRASQSVTSSYLAWYQQKPGQAPRLLIYGASSRATGIPDRFSGSGSGTDFTLTISRLEPEDFAVYYCQQYGRSPTWTFGQGTKVEIK		1.3225	0.698	1.9705	1.872	1.837	1.889	1.661	1.704	1.793	1.829	419.377	>10000
	C578	1.3m	VH3-30	JH6	CAGGTGCAGCTGGTGGAGTCTGGGGGAGGCGTGGTCCAGCCTGGGAGGTCCCTGAGACTCTCCTGTGCAGCCTCTGGATTCACCTTCAGTAGCTCTGGCATGCACTGGGTCCGCCAGGCTCCAGGCAAGGGGCTGGAGTGGGTGGCAATTATATCATATGATGGAAGTAATAAATACTATGCAGACTCCGTGAAGGGCCGATTCACCATCTCCAGAGACAATTCCAAGAACACGCTGTCTCTGCAAATGAACAGCCTGAGAGCTGAGGACACGGCTGTGTATTACTGTGCGAAAGACCCATTGCCTTTTCGGGACTTCTTCTACTACTACATGGACGTCTGGGGCAAAGGGACCACGGTCACCGTCTCCTCA	QVQLVESGGGVVQPGRSLRLSCAASGFTFSSSGMHWVRQAPGKGLEWVAIISYDGSNKYYADSVKGRFTISRDNSKNTLSLQMNSLRAEDTAVYYCAKDPLPFRDFFYYYMDVWGKGTTVTVSS		VL2-14	JL1	CAGTCTGCCCTGACTCAGCCTGCCTCCGTGTCTGGGTCTCCTGGACAGTCGATCACCATCTCCTGCACTGGAACCAGCAGTGACGTTGGTGGTTATAACTATGTCTCCTGGTACCAACAACACCCAGGCAAAGCCCCCAAACTCATGATTTATGATGTCAGTAATCGGCCCTCAGGGGTTTCTAATCGCTTCTCTGGCTCCAAGTCTGGCAACACGGCCTCCCTGACCATCTCTGGGCTCCAGGCTGAGGACGAGGCTGATTATTACTGCAGCTCATATACAAGCAGCAGCACTCTCGGGGTCTTCGGAACTGGGACCAAGGTCACCGTCCTAG	QSALTQPASVSGSPGQSITISCTGTSSDVGGYNYVSWYQQHPGKAPKLMIYDVSNRPSGVSNRFSGSKSGNTASLTISGLQAEDEADYYCSSYTSSSTLGVFGTGTKVTVL		1.08	1.271	136.7	>10000	1.316	1.689	1.385	1.561	1.517	1.644	13.2727	150.358
	C579	6.2m	VH3-30	JH6	CAGGTGCAGCTGGTGGAGTCTGGGGGAGGCGTGGTCCAGCCTGGGAGGTCCCTGAGACTCTCCTGTGCAGCCTCTGGATTCACCTTCAGTAACTATGGCATGCACTTGGTCCGTCAGGCTCCAGGCAAGGGGCTGGAGTGGGTGGCAATTATATCATATGATGGAAGTAATAAATACTATGCGGACTCCGTGAAGGGCCGATTCACCATCTCCAGAGACAGTTCCAAGAACACGCTGTATCTGCAAATGAACAACCTGAGAGCTGAGGACACGGCTGTGTATTACTGTGCGAAAGACCCATTGCCTTTTCGGGACTATTATTACTACTACATGGACGTCTGGGGCAAAGGGACCACGGTCACCGTCTCCTCA	QVQLVESGGGVVQPGRSLRLSCAASGFTFSNYGMHLVRQAPGKGLEWVAIISYDGSNKYYADSVKGRFTISRDSSKNTLYLQMNNLRAEDTAVYYCAKDPLPFRDYYYYYMDVWGKGTTVTVSS		VL2-14	JL1	CAGTCTGCCCTGACTCAGCCTGCCTCCGTGTCTGGGTCTCCTGGACAGTCGATCACCATCTCCTGCACTGGAACCAGCAGTGACGTTGGTGGTTATAACTATGTCTCCTGGTACCAACAACACCCAGGCAAAGCCCCCAAACTCATGATTTATGATGTCAGTAATCGGCCCTCAGGGGTTTCTAATCGCTTCTCTGGCTCCAAGTCTGGCAACACGGCCTCCCTGACCATCTCTGGGCTCCAGGCTGAGGACGAGGCTGATTATTACTGCAGCTCATATACAAGCAGCAGCACTCTCGGGGTCTTCGGAACTGGGACCAAGGTCACCGTCCTAG	QSALTQPASVSGSPGQSITISCTGTSSDVGGYNYVSWYQQHPGKAPKLMIYDVSNRPSGVSNRFSGSKSGNTASLTISGLQAEDEADYYCSSYTSSSTLGVFGTGTKVTVL		3.48	2.365	2108	>10000	3.3	4.2	3.37	2.93	3.79	3.199	154.751	1054.97
	C580	6.2m	VH5-51	JH4	GAGGTGCAGCTGGTGCAGTCTGGAGCAGAGGTGAAAAAGGCCGGGGAGTCTCTCAAGATCTCCTGTAACAGTTCTGGATACAGCTTTACCAACTACTGGATCGCCTGGGTGCGCCAGGTGCCCGGGAAAGGCCTGGAGTGGATGGGGATCATCTATCTTGGTGACTCTGATACCAGGTACAGCCCGTCCTTCCAAGGCCGGGTCACCATCTCAGCCGACAAGTCCATCAGCGCCGCCTACCTGCACTGGAGCAGCCTGAAGGCCTCGGACACCGCCATCTATTACTGTGCGAGGGGAGGGCCCCCCGGGGGGGTCAAACTGGAATTGACTGACTTCTGGGGCCAGGGAACCCTGGTCACCGTCTCCTCAG	EVQLVQSGAEVKKAGESLKISCNSSGYSFTNYWIAWVRQVPGKGLEWMGIIYLGDSDTRYSPSFQGRVTISADKSISAAYLHWSSLKASDTAIYYCARGGPPGGVKLELTDFWGQGTLVTVSS		VL1-44	JL2	CAGTCTGTGCTGACGCAGCCACCCTCAGCGTCTGGGACCCCCGGGCAGAGGGTCACCATCTCTTGTTCTGGAAGCAACTCCAATATCGGTGATAATACTGTACATTGGTACCAGCAACTCCCAGGAACGGCCCCCAAACTCCTCATCTTTAATAATAATCAGCGGCCCTCAGGGGTCCCTGACCGATTCTCTGGCTCCAAGTCTGGCACCTCAGCCTCCCTGGCCATCAGTGGGCTCCAGTCTGACGATGAGGCTGATTATTACTGTGCAGCATGGGATGACAGCCTAGATGGTCCTGTGGTATTCGGCGGAGGGACCAAGCTGACCGTCCTAG	QSVLTQPPSASGTPGQRVTISCSGSNSNIGDNTVHWYQQLPGTAPKLLIFNNNQRPSGVPDRFSGSKSGTSASLAISGLQSDDEADYYCAAWDDSLDGPVVFGGGTKLTVL		1.815	1.69	2.504	1.832	2.206	1.925	1.988	2.03	1.747	2.112	116.794	575.017
	C581	1.3m	VH5-51	JH4	GAGGTGCAGCTGGTGCAGTCTGGAGCAGAGGTGAAAAAGCCCGGGGAGTCTCTGAAGATCTCCTGTAAGGGTTCTGGATACAGATTCACCAGCTACTGGATCGCCTGGGTGCGCCAGATGCCCGGGAAAGGCCTGGAGTGGATGGGGATCATCTATCCTGGTGACTCTGATACCAGATACAGCCCGTCCTTCCAAGGCCAGGTCACCATCTCAGCCGACCAGTCCATCAGCACCGCCTACCTGCAGTGGAGCAGCCTGAAGGCCTCGGACACCGCCATGTATTACTGTGCGAGGGGAGGGCCCCCCGGGGGGGTCAAACTGGAACTGACTGACTACTGGGGCCAGGGAGCCCTGGTCACCGTCTCCTCAG	EVQLVQSGAEVKKPGESLKISCKGSGYRFTSYWIAWVRQMPGKGLEWMGIIYPGDSDTRYSPSFQGQVTISADQSISTAYLQWSSLKASDTAMYYCARGGPPGGVKLELTDYWGQGALVTVSS		VL1-44	JL2	CAGTCTGTGCTGACTCAGCCACCCTCAGCGTCTGGGACCCCCGGGCAGAGGGTCACCATCTCTTGTTCTGGAAGCAGCTCCAACATCGGAAGTAATACTGTAAACTGGTACCAGCAGCTCCCAGGAACGGCCCCCCAACTCCTCATCTATAATAATTATCAGCGGCCCTCAGGGGTCCCTGACCGATTCTCTGGCTCCAAGTCTGGCACCTCAGCCTCCCTGGCCATCAGTGGGCTCCAGTCTGAGGATGAGGCTGATTATTACTGTGCAGCATGGGATGACAGCCTGAATGGTCCTGTGGTATTCGGCGGAGGGACCAAGCTGACCGTCCTAG	QSVLTQPPSASGTPGQRVTISCSGSSSNIGSNTVNWYQQLPGTAPQLLIYNNYQRPSGVPDRFSGSKSGTSASLAISGLQSEDEADYYCAAWDDSLNGPVVFGGGTKLTVL		1.583	3.042	2.746	1.533	1.77	1.809	1.737	1.837	1.586	4.255	31.5729	351.602
	C582	6.2m	VH3-30	JH4	CAGGTGCAGCTGGTGGAGTCTGGGGGAGGCGTGGTCCAGCCTGGGAGGTCCCTGAGACTCTCCTGTGTAGCCTCTGGATTCACCTTCAGTTACTTTGACATGCACTGGGTCCGCCAGGCTCCAGGCAAGGGGTTGGAGTGGGTGGCACTTATATCACATGATGGAAGTACTACATTCTATGGAGACTCCGCGAGGGGCCGATTCACCATCTCCAGAGACAATTCCAGGAACACGCTGGATTTGCAAATGAACAGCCTGAGACCTGAGGACACGGCTGTGTATTTCTGTGCGAAACCTGTGGATGCAGCTATGTTTGACTTCTGGGGCCAGGGAACCCTGGTCACCGTCTCCTC	QVQLVESGGGVVQPGRSLRLSCVASGFTFSYFDMHWVRQAPGKGLEWVALISHDGSTTFYGDSARGRFTISRDNSRNTLDLQMNSLRPEDTAVYFCAKPVDAAMFDFWGQGTLVTVS		VL3-21	JL2	TCCTATGAGCTGACTCAGCCACCCTCAGTGTCAGTGGCCCCAGGAAAGACGGCCAGGATTACCTGTGGGGGCAACAACATTGGAAGTAAAAGTGTGCACTGGTACCAGCAGAGGCCAGGCCAGGCCCCTGTGTTGGTCATCTATTATGATTCCGACCGGCCCTCTGGGATCCCTGAGCGATTCTCTGGCTCCAACTCTGGAAACACGGCCACCCTGACCATCAGCAGGGTCGAAGCCGGGGATGAGGCCGACTTCTACTGTCAGGTGTGGGATAGGAGTACTAATCATCTTGTGGTATTCGGCGGAGGGACCCAGCTGACCGTCCTAG	SYELTQPPSVSVAPGKTARITCGGNNIGSKSVHWYQQRPGQAPVLVIYYDSDRPSGIPERFSGSNSGNTATLTISRVEAGDEADFYCQVWDRSTNHLVVFGGGTQLTVL		8.432	n.d.	n.d.	n.d.	n.d.	n.d.	n.d.	n.d.	n.d.	n.d.	161.623	2079.03
	C583	6.2m	VH3-53	JH6	GAGGTGCAGCTGGTGGAGTCTGGAGGAGGCTTGATCCAGCCTGGGGGGTCCCTGAGACTCTCCTGTGCAGCCTCTATATTAACCGTCAGTAGGAACTACATGAGCTGGGTCCGCCAGGCTCCAGGGAAGGGGCTGGAGTGGGTCTCAAGTATTTATAGCGGTGGTACAACATACTACGCAGACTCAGTGAAGGGCCGATTCACCATCTCCAGAGACGATTCCAAGAACACGCTGTATCTTCAAATGAACAGCCTGAGAGCCGAGGACACGGCCGTCTATTACTGTGCGAGACCGGTGGTGGGGGGTCGGGCGGGTATGGACGTCTGGGGCCAAGGGACCACGGTCACCGTCTCCTCA	EVQLVESGGGLIQPGGSLRLSCAASILTVSRNYMSWVRQAPGKGLEWVSSIYSGGTTYYADSVKGRFTISRDDSKNTLYLQMNSLRAEDTAVYYCARPVVGGRAGMDVWGQGTTVTVSS		VK1-33	JK4	GACATCCAGATGACCCAGTCCCCATCCTCCCTGTCTGCATCTGTTGGAGACAGAGTCACCATCACTTGCCAGGCGAGTCAGGACATTAACAAGTATTTAAATTGGTATCAGCAGAAACCAGGGAAAGCCCCTAAGCTCCTGATCTACGATGCATCCAATTTGGAAACAGGGGTCCCATCAAGGTTCAGTGGAAGTGGATCTGGGACAGATTTTACTTTCACAATCAGTAGCCTGCAGCCTGAAGATATTGGAACATTTTACTGTCTACACAATGATAATCCCCCTCTCACTTTCGGCGGAGGGACCAAGGTGGAGATCAAAC	DIQMTQSPSSLSASVGDRVTITCQASQDINKYLNWYQQKPGKAPKLLIYDASNLETGVPSRFSGSGSGTDFTFTISSLQPEDIGTFYCLHNDNPPLTFGGGTKVEIK		4.424	n.d.	n.d.	n.d.	n.d.	n.d.	n.d.	n.d.	n.d.	n.d.	37.7149	103.786
	C584	6.2m	VH3-13	JH2	GAGGTGCAGCTGGTGGAGTCTGGGGGAGGCTTGGTACAGCCTGGGGGGTCCCTGAGACTCTCCTGTGCAGCCTCTGGATTCACCTTCAGTACCTACGACATGCACTGGGTCCGCCAAGCTACAGGAAAAGGTCTGGAATGGGTCTCAGCTATTGGTACTGCTGGTGACAAATACTATCCAGGCTCCGTGAAGGGCCGATTCACCATCTCCAGAGAAAATGCCAAGAACTCCTTGTATCTTCAAATGAACAGCCTGAGAGCCGGGGACACGGCTGTGTATTACTGTGTAAGAGCCGGGTACAGCAGTGGCTGGCCACTCTACTGGTACTTCGATCTCTGGGGCCGTGGCACACTGGTCACCGTCTCCTCAG	EVQLVESGGGLVQPGGSLRLSCAASGFTFSTYDMHWVRQATGKGLEWVSAIGTAGDKYYPGSVKGRFTISRENAKNSLYLQMNSLRAGDTAVYYCVRAGYSSGWPLYWYFDLWGRGTLVTVSS		VK1-39	JK3	GACATCCAGATGACCCAGTCTCCATCCTCCCTGTCTGCCTCTGTAGGAGACAGAGTCACCATCACTTGCCGGGCAAGTCAGAGCATTAGCAGCTATTTAAATTGGTATCAGCAGAAACCAGGGAAAGCCCCTAAGTTCCTGATCTATGCTGCATCCAGTTTGCAAAGTGGGGTCCCATCAAGGTTCAGTGGCAGTGGCTCTGGGACAGATTTCACTCTCACCATCAGCAATCTGCAACCTGAAGATTTTGCAACTTACTACTGTCAACAGAGTTACAGAACCCCTCCCGAATTCACTTTCGGCCCTGGGACCAAAGTGGATATCAAAC	DIQMTQSPSSLSASVGDRVTITCRASQSISSYLNWYQQKPGKAPKFLIYAASSLQSGVPSRFSGSGSGTDFTLTISNLQPEDFATYYCQQSYRTPPEFTFGPGTKVDIK		10.5	n.d.	n.d.	n.d.	n.d.	n.d.	n.d.	n.d.	n.d.	n.d.	3453.82	>10000
	C585	6.2m	VH4-59	JH4	CAGGTGCAGCTGCAGGAGTCGGGCCCAGGACTGGTGAAGCCTTCGGAGACCCTGTCCCTCACCTGCACTGTCTCTGGTGACTCCATCAGTAGTTACTTCTGGAGCTGGATCCGGCAGCCCCCAGGGAGGGGACTGGAGTGGATTGGATATATCCATGATAGTGTTAACACCAACTACAACCCCTCCCTCAAGAGTCGAGTCACCATATCAGTAGACACGTCCAAGAGCCAGTTCTCCCTGAGGCTGAGCTCTGTGACCGCTGCGGACACGGCCGTGTATTACTGTGCGCGATGCGCGTGGCTTCGAGGGTCCTTTGACTACTGGGGCCAGGGAACCCTGGTCACCGTCTCCTCAG	QVQLQESGPGLVKPSETLSLTCTVSGDSISSYFWSWIRQPPGRGLEWIGYIHDSVNTNYNPSLKSRVTISVDTSKSQFSLRLSSVTAADTAVYYCARCAWLRGSFDYWGQGTLVTVSS		VL6-57	JL1	AATTTTATGCTGACTCAGCCCCACTCTGTGTCGGAGTCTCCGGGGAAGACGGTAACCATCTCCTGCACCGGCAGCAGTGGCAGCATTGCCAGCAACTATGTGCAGTGGTACCAGCAGCGCCCGGGCAGTGCCCCCACCACTGTGATCTATGAGGATAATCAAAGACCCTCTGGGGTCCCTGATCGGTTCTCTGGCTCCATCGACAGCTCCTCCAACTCTGCCTCCCTCACCATCTCTGGACTTAAGACTGAGGACGAGGCTGACTACTACTGTCAGTCTTATGATTTCAGCAGTCATTATGTCTTCGGAACTGGGACCAAGGTCACCGTCCTAG	NFMLTQPHSVSESPGKTVTISCTGSSGSIASNYVQWYQQRPGSAPTTVIYEDNQRPSGVPDRFSGSIDSSSNSASLTISGLKTEDEADYYCQSYDFSSHYVFGTGTKVTVL		11	n.d.	n.d.	n.d.	n.d.	n.d.	n.d.	n.d.	n.d.	n.d.	222.004	1198.28
	C586	6.2m	VH3-53	JH6	GAGGTGCAGCTGGTGGAGTCTGGAGGAGGCTTGATCCAGCCTGGGGGGTCCCTGAGACTCTCCTGTACAGCCTCTGGCTTAATCGTCAGTAGCAACTACATGAGCTGGATCCGCCAGGCTCCAGGGAAGGGACTGGAGTGGGTCTCACTAATTTATAGCGGTGGGAGCACATTCTACGCAGACTCCGTGAAGGGCCGATTCACCATCTCCAGAGACAATTCCAAGAACACGCTGTTTCTTCACATGAACAGCCTGAGAGCCGAGGACACGGCCGTCTATTACTGTGCGAGACATCCCTACGGTACGGACGTCTGGGGCCAGGGGACCACGGTCACCGTCTCCTCA	EVQLVESGGGLIQPGGSLRLSCTASGLIVSSNYMSWIRQAPGKGLEWVSLIYSGGSTFYADSVKGRFTISRDNSKNTLFLHMNSLRAEDTAVYYCARHPYGTDVWGQGTTVTVSS		VK1-33	JK5	GACATCCAGATGACCCAGTCTCCATCCTCCCTGTCTGCATCTGTAGGAGACAGAGTCACCATCACTTGCCAGGCGAGTCAGGACATTGTCAAGTATCTAAATTGGTATCAGCAAAAATCAGGGAAAGCCCCTAAGCTCCTGATCCACGATGCATCCAATTTGGAAACAGGGGTCACATCAAGGTTCAGTGGAAGTGGATCTGGGACACATTTTACTTTCACCATCAGCAGCCTGCAGCCTGAAGATCTTGCAACATATTACTGTCAACAGTATGATAATCTCCCGATCACCTTCGGCCAAGGGACACGACTGGAGATTAAAC	DIQMTQSPSSLSASVGDRVTITCQASQDIVKYLNWYQQKSGKAPKLLIHDASNLETGVTSRFSGSGSGTHFTFTISSLQPEDLATYYCQQYDNLPITFGQGTRLEIK		5.422	n.d.	n.d.	n.d.	n.d.	n.d.	n.d.	n.d.	n.d.	n.d.	45.2	126.357
	C587	6.2m	VH1-69	JH4	CAGGTGCAGCTGGTGCAGTCTGGGGCTGAGGTGAAGAAGTCTGGGTCCTCGGTGAAGGTCTCCTGCAAGGCTTCTGGAGGCTCCTTCAGCAGCTATGCTATCAGCTGGGTGCGACAGGCCCCTGGACAAGGGCTTGAGTGGATGGGAGGGATCATCCCTATCTTTGGTACAGCAAAGTACGCACAAAAGTTCCAGGGCAGAGTCACGATTACCGCGGACGAATCCACGAGCACAGCCTACATGGAGCTGAGCAGCCTGAGATCTGAGGACACGGCCGTGTATTACTGTGCGAGTAGGTGGGAACAACTAAATGGTGGAAGTTGGCACTACTTTGACTACTGGGGCCAGGGAACCCTGGTCACCGTCTCCTCAG	QVQLVQSGAEVKKSGSSVKVSCKASGGSFSSYAISWVRQAPGQGLEWMGGIIPIFGTAKYAQKFQGRVTITADESTSTAYMELSSLRSEDTAVYYCASRWEQLNGGSWHYFDYWGQGTLVTVSS		VL2-23	JL3	CAGTCTGCCCTGACTCAGCCTGCCTCCGTGTCTGGGTCTCCTGGACAGTCGATCACCATCTCCTGCACTGGAACCAGAAGTGACGTTGGGAGGAATAACCTTGTCTCCTGGTACCAACACCACCCAGGCAAAGCCCCCAAAGTCATGATTTATGAGGGCAGTAAGCGACCCTCAGGGGTTTCTACTCGCTTCTCTGGCTCCAAGTCTGGCAACACGGCCTCCCTGACAATCTCTGGGCTCCAGGCTGAGGACGAGGCTGATTATTACTGCTGCTCATATGCAGGTAGTAGTACTTTCGAGGGGGTCTTCGGCGGAGGGACCAAGCTGACCGTCCTAG	QSALTQPASVSGSPGQSITISCTGTRSDVGRNNLVSWYQHHPGKAPKVMIYEGSKRPSGVSTRFSGSKSGNTASLTISGLQAEDEADYYCCSYAGSSTFEGVFGGGTKLTVL		4.392	n.d.	n.d.	n.d.	n.d.	n.d.	n.d.	n.d.	n.d.	n.d.	6.16903	31.0005
	C588	6.2m	VH3-73	JH5	GAGGTGCAGCTGGTGGAGTCCGGGGGAGGCTTGGTCCAGCCTGGGGGGTCCCTGAAACTCTCCTGTGCAGCCTCTGGGTTCACCTTCAGTGGCTCTGCTATGCACTGGGTCCGCCAGGCTTCCGGGAAAGGGCTGGAGTGGGTTGGCCGTATTAGAAACAAAGCTAACAGTTACGCGACAGCATATGGTGCGTCGGTGAGAGGCAGGTTCACCGTCTCCAGAGATGATTCAAAGAACACGGCGTATCTGCAAATGAACAGCCTGAAAATCGAGGACACGGCCGTGTATTACTGTACTAAAGATATAGCAGCTGGTATCCCTGCCCTTAACTGGTTCGACTCCTGGGGCCAGGGAACCCTGGTCACCGTCTCCTCAG	EVQLVESGGGLVQPGGSLKLSCAASGFTFSGSAMHWVRQASGKGLEWVGRIRNKANSYATAYGASVRGRFTVSRDDSKNTAYLQMNSLKIEDTAVYYCTKDIAAGIPALNWFDSWGQGTLVTVSS		VK3-11	JK4	GAAATTGTGTTGACACAGTCTCCAGCCACCCTGTCTTTGTCTCCAGGGGAAAGAGCCACCCTCTCCTGCAGGGCCAGTCAGAGTGTTAGCAGCTACTTAGCCTGGTACCAACAGAAACCTGGCCAGGCTCCCAGGCTCCTCATCTATGATGCATCCAACAGGGCCACTGGCATCCCAGCCAGGTTCAGTGGCAGTGGGTCTGGGACAGACTTCACTCTCACCATCAGCAGCCTAGAGCCTGAAGATTTTGCAGTTTATTACTGTCAGCAGCATACCAACTGGCCCCCGAGGATCACTTTCGGCGGAGGGACCAAGGTGGAAATCAAAC	EIVLTQSPATLSLSPGERATLSCRASQSVSSYLAWYQQKPGQAPRLLIYDASNRATGIPARFSGSGSGTDFTLTISSLEPEDFAVYYCQQHTNWPPRITFGGGTKVEIK		1.362	n.d.	n.d.	n.d.	n.d.	n.d.	n.d.	n.d.	n.d.	n.d.	12.0009	122.24
	C589	6.2m	VH4-30	JH1	CAGGTGCAGCTGCAGGAGTCGGGCCCAGGACTGGTGAAGCCTTCACAGACCCTGTCCCTCACCTGCACTGTCTCTGGTGGCTCCATCAGCAGTGGTGATTACTATTGGAGTTGGATCCGCCAGCCCCCAGGGAAGGGCCTGGAGTGGATTGGGTACATCTATTACAGTGGGAGCACCAACTACAACCCGTCCCTCAGGAGTCGAGTTACCATATCAGTAGACACGTCCAAGAACCAGTTCTCCCTGAGGCTGAGGTCTGTGACTGCCGCAGACACGGCCGTGTATTACTGTGCCAGAGATGCCATCGGGTCCGCGTCGTACGGTGTTGAATACTTCCAGCACTGGGGCCAGGGCACCCTGGTCACCGTCTCCTCAG	QVQLQESGPGLVKPSQTLSLTCTVSGGSISSGDYYWSWIRQPPGKGLEWIGYIYYSGSTNYNPSLRSRVTISVDTSKNQFSLRLRSVTAADTAVYYCARDAIGSASYGVEYFQHWGQGTLVTVSS		VK3-20	JK2	GAAATTGTGTTGACGCAGTCTCCAGGCACCCTGTCTTTGTCTCCAGGGGAAAGAGCCACCCTCTCCTGCAGGGCCAGTCAGAGTGTTAGTAGCAGATACTTAGCCTGGTACCAGCAGAAACCTGGCCAGGCTCCCAGGCTCCTCATCTATGGTGCATCCAGCAGGGCCACTGGCATCCCAGACAGGTTCAGTGGCAGTGGGTCTGGGACAGAGTTCACTCTCACCATCAGCAGACTGGAGCCTGAAGATTTTGCAGTGTATTACTGTCAGCAGTATGGTAGCTCACCTCCGTACACTTTTGGCCAGGGGACCAAGCTGGAGATCAAAC	EIVLTQSPGTLSLSPGERATLSCRASQSVSSRYLAWYQQKPGQAPRLLIYGASSRATGIPDRFSGSGSGTEFTLTISRLEPEDFAVYYCQQYGSSPPYTFGQGTKLEIK		6.614	n.d.	n.d.	n.d.	n.d.	n.d.	n.d.	n.d.	n.d.	n.d.	227.054	2760.53
	C590	6.2m	VH1-24	JH4	CAGGTCCAGCTGGTACAGTCTGGGGCTGAGGTGAAGAAGCCTGGGGCCTCAGTGAAGGTCTCCTGCAAGGTTTCCGGATACAACCTCACTGAATTATCCATGTACTGGGTGCGACAGGCTCCTGGAAAAGGGCTTGAGTGGATGGGAGGTTTTGATCCTGAAGATGGTGGACCAATCCACGCACAGAAATTCCAGGGCAGAGTCACCATGACCGAAGACCCATCTACAGACACAGCCTACATGGAGCTGCGCAGCCTGAGATCTGAAGACACGGCCCTGTATTACTGTGCAACGGGGGGGTTATTTATGATTCGGGGACTTGAGATATGGGGCCGGGGAACCCTGGTCACCGTCTCCTCAG	QVQLVQSGAEVKKPGASVKVSCKVSGYNLTELSMYWVRQAPGKGLEWMGGFDPEDGGPIHAQKFQGRVTMTEDPSTDTAYMELRSLRSEDTALYYCATGGLFMIRGLEIWGRGTLVTVSS		VK3-20	JK4	GAAATTGTGTTGACGCAGTCTCCAGGCACCCTGTCTTTGTCTCCAGGGGAAAGAGCCACCCTCTCCTGCAGGGCCAGTCAGAGTATCAGCTACACCTCCTTAGCCTGGTACCAGCAGAAACCTGGCCAGGCTCCCAGGCTCCTCATCTTTGGTGCATCCAGGGGGGCCACTGGCACCCCAGACAGGTTCAGTGGCAGTTGGTCTGGGACAGACTTCACTCTCACCATCAGCAGACTGGAGCCTGAAGATTTTGCAGTGTATTACTGTCAGCAGTACGGTAACTCACCTCGGCTCAGTTTCGGCGGAGGGACCAAGGTGGAGATCAAA	EIVLTQSPGTLSLSPGERATLSCRASQSISYTSLAWYQQKPGQAPRLLIFGASRGATGTPDRFSGSWSGTDFTLTISRLEPEDFAVYYCQQYGNSPRLSFGGGTKVEIK		2.812	n.d.	n.d.	n.d.	n.d.	n.d.	n.d.	n.d.	n.d.	n.d.	96.6488	425.473
	C591	1.3m	VH1-2	JH6	CAGGTGCAGCTGGTGCAGTCTGGGGCTGAGGTGAAGAAGCCTGGGGCCTCAGTGAAGGTCTCCTGCAAGGCTTCTGGATACATCTTGACCGACTACTTTATTCACTGGGTGCGACAGGCCCCTGGACAAGGGCTTGAGTGGATGGGATGGATCAACCCTAACAGTGGTGGCACAAACTATGCACAGAAGTTTCAGGGCAGGGTCACCATGACCAGGGACACGTCCATCAGCACAGCCTACATGGAGCTGAGCAGGCTGAGATCTGACGACACGGCCGTGTATCACTGTGCGAGATACAAGGGGACTACGGTGAACACAAACTACTACTACGGTATGGACGTCTGGGGCCAAGGGACCACGGTCACCGTCTCCTCA	QVQLVQSGAEVKKPGASVKVSCKASGYILTDYFIHWVRQAPGQGLEWMGWINPNSGGTNYAQKFQGRVTMTRDTSISTAYMELSRLRSDDTAVYHCARYKGTTVNTNYYYGMDVWGQGTTVTVSS		VL3-1	JL2	TCCTATGAGCTGACTCAGCCACCCTCAGTGTCCGTGTCCCCAGGACAGACAGCCAGCATCACCTGCTCTGGAGATAAATTGGGGGATAAATATGCTTGCTGGTATCAGCAGAAGGCAGGCCAGTCCCCTGTGTTGGTCATCTATCAAGATAGCAAGCGGCCCTCAGGGATCCCTGAGCGATTCTCTGGCTCCAAGTCTGGGAACACAGCCACTCTGACCATCAGCGGGACCCAGGCTATGGATGAGGCTGACTATTACTGTCAGGCGTGGGACAGCAGCACTGTGGTATTCGGCGGAGGGACCAAGCTGACCGTCCTAG	SYELTQPPSVSVSPGQTASITCSGDKLGDKYACWYQQKAGQSPVLVIYQDSKRPSGIPERFSGSKSGNTATLTISGTQAMDEADYYCQAWDSSTVVFGGGTKLTVL		3.832	3.951	>10000	5.374	5.255	4.304	4.205	3.149	3.663	3.259	245.652	2213.79
	C592	6.2m	VH1-2	JH6	CAGGTGCAGCTGGTGCAGTCTGGGGCTGAGGTGAAGAAGCCTGGGGCCTCAGTGAAGGTCTCCTGCAAGGCTTCTGGATACACCTTCACCGACTACTTTAATCACTGGGTGCGACAGGCCCCTGGACAAGGGCTTGAGTGGATGGGATGGATCAACCCTAACAGTGGTGGCACAAACTCTGCACAGAAGTTTCAGGGCAGGGTCACCATGACCAGGGACACGTCCATCACCACAGTCTACATGGAGCTGAGCAGGCTGAGATCTGACGACACGGCCGTGTATTACTGTGCGAGATACAAGGGGACTACGGTGAACACAAACTACTACTACGGTATGGACGTCTGGGGCCAAGGGACCACGGTCACCGTCTCCTCA	QVQLVQSGAEVKKPGASVKVSCKASGYTFTDYFNHWVRQAPGQGLEWMGWINPNSGGTNSAQKFQGRVTMTRDTSITTVYMELSRLRSDDTAVYYCARYKGTTVNTNYYYGMDVWGQGTTVTVSS		VL3-1	JL2	TCCTATGAGCTGACTCAGCCACCCTCAGTGTCCGTGTCCCCAGGACAGACAGCCAGCATCACCTGCTCTGGAGATAAATTGAGAAATAAATATGCTTGCTGGTATCAGCAGAAGGCAGGCCAGTCCCCTATGCTGGTCATCTATCAAGATACCAAGCGGCCCTCAGGGATCCCTGAGCGATTCTCTGGCTCCAACTCTGGGAACACAGCCACTCTGACCATCAGCGGGACCCAGGCTATGGATGAGGCTGACTATTACTGTCAGGCGTGGGACATCAGCACTGTGGTATTCGGCGGAGGGACCAAGCTGACCGTCCTAG	SYELTQPPSVSVSPGQTASITCSGDKLRNKYACWYQQKAGQSPMLVIYQDTKRPSGIPERFSGSNSGNTATLTISGTQAMDEADYYCQAWDISTVVFGGGTKLTVL		5.998	6.34	>10000	5.872	4.48	5.831	5.035	5.101	5.374	5.581	18.9554	160.711
	C593	6.2m	VH1-8	JH6	CAGGTGCAGCTGGTGCAGTCTGGGGCTGAGGTGAAGAAGCCTGGGGCCTCAGTGAAGGTCTCCTGCAAGGCTTCTGGATACACCTTCACCAGTTATGATATCAACTGGGTGCGACAGGCCCCTGGACAAGGGCTTGAGTGGATGGGATGGATGAACCCTAACAGTGGTAACACAGACTATGCACAGAAGTTCCAGGGCAGATTCACCATGACCAGGAACACCTCCATAAGCACAGCCTACATGGAGCTGAGCAGCCTGAGATCTGAGGACACGGCCGTGTATTACTGTGCGAGCAGGCGTTGGGACCCTTTGACATTCTACTACTACATGGTCGTCTGGGGCAAAGGGACCACGGTCACCGTCTCCTCA	QVQLVQSGAEVKKPGASVKVSCKASGYTFTSYDINWVRQAPGQGLEWMGWMNPNSGNTDYAQKFQGRFTMTRNTSISTAYMELSSLRSEDTAVYYCASRRWDPLTFYYYMVVWGKGTTVTVSS		VK2-28	JK4	GATATTGTGATGACTCAGTCTCCACTCCCCCTGCCCGTCACCCCTGGAGAGCCGGCCTCCATCTCCTGCAGGTCTAGTCAGAGCCTCCTGTATAGTAATGGATACAACTATTTGGATTGGTACCTGCAGAAGCCAGGGCAGTCTCCACAGCTCCTGATCTATTTGGGTTCTAATCGGGCCTCCGGGGTCCCTGACAGGTTCAGTGGCAGTGGATCAGGCACAGATTTCACACTGAAAATCAGCAGAGTGGAGGCTGAGGATGTTGGGGTTTATTTCTGCATGCAAGCTCTACAAACTCCTCCCACTTTCGGCGGAGGGACCAAGGTGGAGATCAAAC	DIVMTQSPLPLPVTPGEPASISCRSSQSLLYSNGYNYLDWYLQKPGQSPQLLIYLGSNRASGVPDRFSGSGSGTDFTLKISRVEAEDVGVYFCMQALQTPPTFGGGTKVEIK		4.359	n.d.	n.d.	n.d.	n.d.	n.d.	n.d.	n.d.	n.d.	n.d.	10.2449	45.2812
	C594	1.3m	VH3-30	JH5	CAGGTGCAGCTGGTGGAGTCTGGGGGAGGCGTGGTCCAGCCTGGGAGGTCCCTGAGACTCTCCTGTGCAGCCTCTGGATTCACCTTCAGTAGCTATGGCATGCACTGGGTCCGCCAGGCTCCAGGCAAGGGGCTGGAGTGGGTGGCAGTTATATCAGATGATGGAAGTAATAAATACTATGCAGACTCCGTGAAGGGCCGATTCACCATCTCCAGAGACAATTCCAAGAACACGCTGTATCTGCAAATGAACAGCCTGAGAGCTGAGGACACGGCTGTGTATTATTGTGCGAAAAGTTGGTGGTTATCAGAGAACTGGTTCGACCCCTGGGGCCAGGGAACCCTGGTCACCGTCTCCTCAG	QVQLVESGGGVVQPGRSLRLSCAASGFTFSSYGMHWVRQAPGKGLEWVAVISDDGSNKYYADSVKGRFTISRDNSKNTLYLQMNSLRAEDTAVYYCAKSWWLSENWFDPWGQGTLVTVSS		VK3-15	JK4	GAAATAGTGATGACGCAGTCTCCAGCCACCCTGTCTGTGTCTCCAGGGGAAAGAGCCACCCTCTCCTGCAGGGCCAGTCAGAGTGTTAGCAGCAACTTAGCCTGGTACCAGCAGAAACCTGGCCAGGCTCCCAGGCTCCTCATCTATGGTGCATCCACCAGGGCCACTGGTATCCCAGCCAGGTTCAGTGGCACTGGGTCTGGGACAGAGTTCACTCTCACCATCAGCAGCCTGCAGTCTGAAGATTTTGCAGTTTATTACTGTCAGCAGTATAATAACTGGCCTCTCACTTTCGGCGGAGGGACCAAGGTGGAGATCAAAC	EIVMTQSPATLSVSPGERATLSCRASQSVSSNLAWYQQKPGQAPRLLIYGASTRATGIPARFSGTGSGTEFTLTISSLQSEDFAVYYCQQYNNWPLTFGGGTKVEIK		2.632	6.299	37.37	1.762	17.83	7.225	2.045	1.78	2.009	1.839	158.539	855.335
	C595	6.2m	VH3-30	JH5	CAGGTGCAGCTGGTGGAGTCTGGGGGAGGCGTGGTCCAGGCTGGGAGGTCCCTGAGACTCTCCTGTGCAGCCTCTGGATTCACCTTCAGTAGCTTTGGATTGCACTGGGTCCGCCAGGCTCCAGGCAAGGGGCTGGAGTGGGTGGCAGTTATATCAGATGATGGAGCTAATAAATACTATGCAGACTCCGTGAAGGGCCGATTCACCATCTCCAGAGACAATTCCAAGAACACATTGTATCTGCAAATGAACAGCCTGAGAGCTGACGACACGGCTAAGTATTATTGTGCGAAAAGTTGGTGGTTATCAGAGAACTGGTTCGACCCCTGGGGCCAGGGAACCCTGGTCACCGTCTCCTCAG	QVQLVESGGGVVQAGRSLRLSCAASGFTFSSFGLHWVRQAPGKGLEWVAVISDDGANKYYADSVKGRFTISRDNSKNTLYLQMNSLRADDTAKYYCAKSWWLSENWFDPWGQGTLVTVSS		VK3-15	JK4	GAAATAGTGATGACGCAGTCTCCAGCCACCCTGTCTGTGTCTCCAGGGGAAAGAGCCACCCTCTCCTGCAGGGCCAGTCAGAGTGTCAGAAGCAACTTAGCCTGGTACCAGCAGAAACCTGGCCAGGCTCCCAGGCTCCTCATCTATGGTGCATCCACCAGGGCCACTGGTATTCCAGCCAGGTTCAGTGGCAGTGGGTCTGGGACAGACTTCACTCTCACCATCAGCAGCCTGCAGTCTGAAGATTTTGCAGTTTATTACTGTCAGCAGTATAATAACTGGCCTCTCACTTTCGGCGGAGGGACCAAGGTGGAGATCAAAC	EIVMTQSPATLSVSPGERATLSCRASQSVRSNLAWYQQKPGQAPRLLIYGASTRATGIPARFSGSGSGTDFTLTISSLQSEDFAVYYCQQYNNWPLTFGGGTKVEIK		2.039	1.668	4.487	1.034	9.203	3.194	2.298	1.948	2.082	1.854	53.208	636.88
	C596	6.2m	VH3-30	JH4	CAGGTGCAGCTGGTGGAGTCTGGGGGAGGCGTGGTCCAGCCTGGGAGGTCCCTGAGACTCTCCTGTGCAGCCTCTGGAATCACCTTCAGTCACTATGGCATGCACTGGGTCCGCCAGGCTCCCGGCAAGGGGCTGGAGTGGGTGGCACTTATCTCATCTGATGGAAGTAAGAAATACTACGCAGACTCCGTGAAGGGCCGATTCACCATCTCCAGAGACAATTCCAAGAGCACGCTGTATCTGCAAATGAACAGCCTGAGAGCTGAGGACACGGCTATATATTACTGTGCGAAAGATTTGGGGTATTACTATGGTCCACCCTACGGACCTGACTACTGGGGCCAGGGAACCCTGGTCACCGTCTCCTCAG	QVQLVESGGGVVQPGRSLRLSCAASGITFSHYGMHWVRQAPGKGLEWVALISSDGSKKYYADSVKGRFTISRDNSKSTLYLQMNSLRAEDTAIYYCAKDLGYYYGPPYGPDYWGQGTLVTVSS		VK1-33	JK2	GACATCCAGATGACCCAGTCTCCATCCTCCCTGTCTGCATCTGTAGGAGACAGAGTCACCATCACTTGCCAGGCGAGTCAGGACGTCAGCAACTCTTTAAATTGGTATCAGCAGAAACCAGGGAAAGCCCCTAAGCTCCTGATCTACGATGCATCCAATTTGGAAACAGGGGTCCCATCACGGTTCAGTGGAAGTGGATCTGGGACAGATTTTAGTTTCACCATTAGCAGCCTGCAGCCTGAAGATATTGCAACATATTACTGTCTACAGTATGATAATTTCTCGATGTACACTTTTGGCCAGGGGACCAAGCTGGAGATCAAAC	DIQMTQSPSSLSASVGDRVTITCQASQDVSNSLNWYQQKPGKAPKLLIYDASNLETGVPSRFSGSGSGTDFSFTISSLQPEDIATYYCLQYDNFSMYTFGQGTKLEIK		21.02	n.d.	n.d.	n.d.	n.d.	n.d.	n.d.	n.d.	n.d.	n.d.	965.511	>10000
